# Supplementary material for: Integrated Metabolic Profiling and Gene Expression Analysis Reveals Therapeutic Modalities in Breast Cancer
Source: Research Square preprint supplement (doi:10.21203/rs.3.rs-117384/v1), 2020-12-09
Supplement: Supplementary file 1 [file 5f2fe079d015aaf7efdb14c1.xlsx]

## Sheet: Table S5
Supplementary Table 5. Top 200 genes high expressed in the tumors of Arginine Biosynthesis-Enriched metabolite profile
Gene Name	Entrez Gene ID	Score(d)	Numerator(r)	Denominator(s+s0)	q-value(%)	localfdr(%)
MYH11	4629	7.82735	13.827	1.7665	0	0
BTNL9	153579	7.8197	10.4475	1.33605	0	0
ADAMTS9-AS2	100507098	7.80351	8.56161	1.09715	0	0
CAPN11	11131	7.64524	9.5056	1.24333	0	0.00477652
PRCD	768206	7.50866	7.20467	0.959515	0	0.0157391
FOSB	2354	7.49138	14.1928	1.89455	0	0.0171302
AGAP11	119385	7.46913	11.3534	1.52004	0	0.0189229
CTTNBP2	83992	7.34113	9.94004	1.35402	0	0.0292549
CBX7	23492	7.30244	6.5317	0.894454	0	0.032378
CEP68	23177	7.25633	4.51832	0.622672	0	0.0360969
PDE2A	5138	7.22766	9.63339	1.33285	0	0.0384072
EGR3	1960	7.19636	13.4375	1.86726	0	0.0409259
ASPA	443	7.1921	9.78209	1.36012	0	0.0412681
GPIHBP1	338328	7.17853	11.0191	1.53501	0	0.0423586
FXYD1	5348	7.17072	11.879	1.65659	0	0.0429856
C7	730	7.10504	17.6799	2.48836	0	0.04824
PGM5	5239	7.09596	11.9974	1.69074	0	0.048963
CCDC8	83987	7.04306	12.3633	1.75538	0	0.053152
F10	2159	7.03815	8.71805	1.23868	0	0.0535388
PRKN	5071	6.98638	6.42502	0.91965	0	0.0575864
RUNDC3B	154661	6.98055	6.89581	0.98786	0	0.0580379
PDK4	5166	6.96906	14.9698	2.14803	0	0.0589256
TSPAN7	7102	6.93194	9.66637	1.39447	0	0.0617655
CCL14	6358	6.82967	14.0892	2.06293	0	0.0693116
USHBP1	83878	6.81642	8.12525	1.19201	0	0.070253
DIXDC1	85458	6.80777	4.44543	0.652994	0	0.0708625
RAPGEF3	10411	6.80725	8.10273	1.19031	0	0.0708985
DLG2	1740	6.76824	9.26755	1.36927	0	0.0735907
CD300LG	146894	6.73419	11.4568	1.70128	0	0.0758618
FAM13C	220965	6.69576	11.5735	1.72847	0	0.0783279
ATP1B2	482	6.69416	9.02005	1.34745	0	0.0784281
CNN1	1264	6.69031	13.9951	2.09185	0	0.0786684
TXNIP	10628	6.67682	6.96501	1.04316	0	0.0795003
ANKRD29	147463	6.6419	10.8095	1.62747	0	0.0815766
ADAM33	80332	6.6382	13.6088	2.05008	0	0.08179
ATOH8	84913	6.62693	10.0925	1.52295	0	0.0824302
DAAM2-AS1	100505635	6.6149	8.44329	1.2764	0	0.0830994
FZD4	8322	6.57032	8.0847	1.23049	0	0.0854337
ACKR1	2532	6.5378	14.876	2.27538	0	0.0869811
LMOD1	25802	6.52423	13.2649	2.03317	0	0.0875845
TCEAL7	56849	6.52067	6.89677	1.05768	0	0.0877384
CAVIN2	8436	6.51744	14.1522	2.17143	0	0.0878766
MYOM1	8736	6.51153	6.40596	0.983788	0	0.0881255
CASQ2	845	6.50304	8.94239	1.37511	0	0.0884741
KLF3-AS1	79667	6.49607	7.50438	1.15522	0	0.0887523
NAALAD2	10003	6.46632	8.37516	1.2952	0	0.0898551
ABCB1	5243	6.459	10.4307	1.61491	0	0.0901048
FHL5	9457	6.44368	9.38884	1.45706	0	0.0905989
LIMS2	55679	6.42201	8.81886	1.37322	0	0.0912288
LOC101928307	101928307	6.40207	6.38902	0.997962	0	0.0917349
CARMN	728264	6.4002	11.4854	1.79453	0	0.0917787
KL	9365	6.3935	7.53603	1.1787	0	0.0919298
TLL1	7092	6.38837	10.3144	1.61456	0	0.0920397
EMCN	51705	6.38751	13.0627	2.04504	0	0.0920577
ABCA8	10351	6.38137	14.4297	2.26122	0	0.0921816
MEOX2	4223	6.37633	11.6157	1.82169	0	0.0922778
ABCA9	10350	6.32463	13.2617	2.09683	0	0.0929614
MRGPRF	116535	6.30467	9.99604	1.5855	0	0.0930685
HRC	3270	6.30358	7.68951	1.21986	0	0.0930717
CLDN5	7122	6.29397	11.5351	1.83273	0	0.0930879
GSTM5	2949	6.27577	10.062	1.60331	0	0.0930576
EEPD1	80820	6.21755	5.3619	0.86238	0	0.0923932
FABP4	2167	6.21492	14.6912	2.36386	0	0.0923414
ADRB2	154	6.21242	8.01056	1.28944	0	0.0922904
NPR1	4881	6.21225	7.79733	1.25515	0	0.0922869
ADRA2A	150	6.20649	11.8426	1.9081	0	0.0921625
ITGA7	3679	6.1983	7.84022	1.2649	0	0.091969
CHL1	10752	6.18658	12.5254	2.02461	0	0.0916575
FAM172A	83989	6.18406	3.4562	0.558888	0	0.0915849
CIRBP	1153	6.18178	4.84303	0.783435	0	0.091518
KIF17	57576	6.17725	6.27806	1.01632	0	0.0913796
FAM162B	221303	6.16124	7.82851	1.27061	0	0.0908405
FLRT2	23768	6.15847	12.9014	2.0949	0	0.0907388
SELP	6403	6.15371	10.8606	1.76489	0	0.0905588
HSPB6	126393	6.15112	14.0963	2.29166	0	0.0904574
PELI2	57161	6.15016	8.4279	1.37036	0	0.0904193
KANK3	256949	6.14893	9.44761	1.53646	0	0.0903704
PIWIL2	55124	6.1395	6.5905	1.07346	0	0.0899769
ARHGAP6	395	6.13886	9.67739	1.57641	0	0.0899491
GRID1	2894	6.12938	8.38749	1.36841	0	0.0895214
GALNT15	117248	6.12752	11.3151	1.84661	0	0.0894339
PDE1A	5136	6.12569	9.92007	1.61942	0	0.0893468
HSPA12B	116835	6.12317	9.42135	1.53864	0	0.089225
RERG	85004	6.11977	9.03592	1.47651	0	0.0890572
C2orf40	84417	6.11511	11.4403	1.87082	0	0.0888207
CYP4F12	66002	6.11404	8.98378	1.46937	0	0.088765
APH1B	83464	6.11268	4.60821	0.753877	0	0.0886941
ZNF366	167465	6.08532	8.57361	1.4089	0	0.0871262
MYCT1	80177	6.08121	10.1656	1.67164	0	0.086867
INKA1	389119	6.08095	4.19722	0.690224	0	0.0868508
PTGER3	5733	6.07916	11.7356	1.93046	0	0.0867358
FAM47E	100129583	6.07825	8.05389	1.32503	0	0.0866766
CCM2L	140706	6.0756	8.45296	1.3913	0	0.0865034
DNAJC18	202052	6.07456	4.28643	0.705636	0	0.0864348
FPGT-TNNI3K	100526835	6.06385	7.64427	1.26063	0	0.0857037
LIN7A	8825	6.06178	9.12129	1.50472	0	0.0855578
CFAP69	79846	6.04034	6.4904	1.07451	0	0.0839445
NKAPL	222698	6.03836	4.96271	0.821864	0	0.0837866
STEAP4	79689	6.00106	11.7978	1.96595	0	0.0805122
LRRN4CL	221091	5.9964	9.51076	1.58608	0	0.0800626
LDB2	9079	5.99632	10.3792	1.73093	0	0.080055
SEMA3D	223117	5.99365	9.36796	1.56298	0	0.0797934
INMT	11185	5.98432	9.76948	1.63251	0	0.078854
ABCA10	10349	5.98176	11.4722	1.91787	0	0.0785904
KLHDC1	122773	5.9788	7.33106	1.22618	0	0.0782811
CORO2B	10391	5.9716	7.00773	1.17351	0	0.0775139
LRRC2	79442	5.96656	7.57915	1.27027	0	0.0769622
ITM2A	9452	5.96269	11.396	1.91122	0	0.0765324
VWF	7450	5.94254	12.164	2.04693	0	0.0741815
RGS5	8490	5.94151	12.0949	2.03567	0	0.0740556
MOCS1	4337	5.93871	6.26554	1.05503	0	0.0737137
UBAP1L	390595	5.91473	6.06985	1.02622	0	0.0706288
EBF2	64641	5.91083	10.4423	1.76664	0	0.0701007
EDNRB	1910	5.90022	10.9983	1.86405	0	0.0686288
MICU3	286097	5.8967	8.15247	1.38255	0	0.0681277
ARHGEF15	22899	5.89058	12.2575	2.08087	0	0.0672423
NOSTRIN	115677	5.87665	8.26006	1.40557	0	0.0651582
MASP2	10747	5.87467	4.56886	0.777721	0	0.0648536
NDNF	79625	5.87218	8.41825	1.43358	0	0.0644672
CLDN11	5010	5.86146	10.3901	1.77261	0	0.0627711
FAM198B-AS1	285505	5.85864	8.09004	1.38087	0	0.0623139
GNG11	2791	5.85226	12.171	2.0797	0	0.0612675
PREX2	80243	5.85191	11.849	2.02481	0	0.0612079
KCND3	3752	5.84607	11.4544	1.95933	0	0.0602302
GAS2	2620	5.84044	6.56503	1.12407	0	0.059268
NRIP2	83714	5.83591	5.4633	0.936153	0	0.0584833
SOX18	54345	5.83521	6.08217	1.04232	0	0.0583598
RUNX1T1	862	5.81869	11.6724	2.00602	0	0.0553948
C1QTNF7	114905	5.79735	9.38878	1.61949	0	0.0513376
BMX	660	5.79198	8.06166	1.39186	0	0.0502761
CES1	1066	5.78766	10.0042	1.72854	0	0.0494099
PRICKLE2	166336	5.78744	6.40117	1.10605	0	0.0493645
RAMP2	10266	5.78357	8.5484	1.47805	0	0.0485792
AMY2B	280	5.78342	6.61252	1.14336	0	0.0485486
PDLIM3	27295	5.77851	6.84169	1.18399	0	0.0475394
PLCXD3	345557	5.77381	8.96669	1.55299	0	0.0465583
FAXDC2	10826	5.77108	6.34462	1.09938	0	0.045983
JAM2	58494	5.77085	11.0859	1.92101	0	0.045935
LINC00982	440556	5.76666	6.98884	1.21194	0	0.0450437
AOC3	8639	5.76095	12.9696	2.2513	0	0.0438118
GPR17	2840	5.75915	7.64095	1.32675	0	0.0434177
PLIN1	5346	5.75468	15.6772	2.72426	0	0.0424342
MYRIP	25924	5.74989	9.77244	1.69959	0	0.0413687
NOVA1	4857	5.74572	9.48591	1.65095	0	0.040427
CHRDL1	91851	5.74297	12.3538	2.15112	0	0.039802
INPP4B	8821	5.74224	9.3943	1.636	0	0.0396341
PHLDB2	90102	5.74203	5.62509	0.979635	0	0.0395852
LEPR	3953	5.73851	7.73787	1.34841	0	0.0387753
LIFR	3977	5.71888	5.87828	1.02787	0	0.0341154
EGR1	1958	5.71727	8.59622	1.50355	0	0.0337214
ADCYAP1R1	117	5.71189	10.4321	1.82638	0	0.0323969
PCDHB5	26167	5.70967	6.95177	1.21754	0	0.0318434
WDR86	349136	5.70635	5.90352	1.03455	0	0.0310111
CYB5D2	124936	5.70621	3.94448	0.691261	0	0.0309751
C16orf45	89927	5.6889	10.121	1.77907	0	0.0265202
AVPR2	554	5.68397	7.0616	1.24237	0	0.025213
CCNDBP1	23582	5.68005	3.99824	0.70391	0	0.0241635
MAPKBP1	23005	5.6715	2.94301	0.518912	0	0.0218399
MMRN2	79812	5.66985	11.2843	1.99024	0	0.0213859
FAM110D	79927	5.66918	6.38441	1.12616	0	0.0211994
LINC01537	101928555	5.66691	6.20562	1.09506	0	0.0205719
COX4I2	84701	5.66155	6.63177	1.17137	0	0.0190696
CAV1	857	5.65265	5.98576	1.05893	0	0.0165368
PPP2R2B	5521	5.65064	6.71756	1.18881	0	0.0159566
IL33	90865	5.64226	10.7954	1.91331	0	0.0135102
ABCA6	23460	5.63997	11.1713	1.98074	0	0.0128312
PDGFD	80310	5.63678	10.0113	1.77607	0	0.0118813
DIPK2B	79742	5.63505	13.5019	2.39606	0	0.0113632
ANKRD65	441869	5.63275	8.96522	1.59162	0	0.0106707
FRY	10129	5.62154	6.68433	1.18906	0	0.0072451
SEMA3E	9723	5.61059	9.53519	1.6995	0	0.00380794
ECSCR	641700	5.60096	10.5052	1.8756	0	0.000716068
NOVA2	4858	5.59148	9.00463	1.61042	0	0
CADM3	57863	5.58816	9.02797	1.61555	0	0
NAP1L2	4674	5.57838	7.39736	1.32608	0	0
LRRC70	100130733	5.57734	7.54249	1.35234	0	0
TAL1	6886	5.57687	8.00231	1.43491	0	0
RASIP1	54922	5.56227	7.92371	1.42455	0	0
SLC7A2	6542	5.5566	14.1741	2.55085	0	0
ARL15	54622	5.55255	4.15299	0.747942	0	0
TRABD2B	388630	5.54234	8.79436	1.58676	0	0
PHYHIP	9796	5.53976	7.26235	1.31095	0	0
SEMA6B	10501	5.53606	9.17421	1.65718	0	0
TNS2	23371	5.52993	5.65341	1.02233	0	0
ACOX2	8309	5.52452	8.19458	1.48331	0	0
DUSP1	1843	5.52231	8.1806	1.48137	0	0
LRRTM2	26045	5.52205	6.01361	1.08902	0	0
PTH1R	5745	5.50853	7.22519	1.31164	0	0
STARD9	57519	5.49366	5.3196	0.968315	0	0
JAM3	83700	5.48788	9.70715	1.76883	0	0
AASS	10157	5.47456	10.7452	1.96275	0	0
IGFN1	91156	5.46544	9.00139	1.64697	0	0
TEK	7010	5.45633	9.75035	1.78698	0	0
RNF125	54941	5.455	6.7039	1.22895	0	0
HGF	3082	5.45484	10.9401	2.00558	0	0
GIMAP1	170575	5.45186	8.4683	1.55329	0	0
NDN	4692	5.44561	11.5127	2.11413	0	0
ROBO4	54538	5.44465	11.3799	2.09011	0	0
MYO15B	80022	5.43848	4.98637	0.916868	0	0
EBF1	1879	5.42965	9.31545	1.71566	0	0
