# Supplementary material for: Integrated Metabolic Profiling and Gene Expression Analysis Reveals Therapeutic Modalities in Breast Cancer
Source: Research Square preprint supplement (doi:10.21203/rs.3.rs-117384/v1), 2020-12-09
Supplement: Supplementary file 2 [file 73a2d25af32c6fc46ef5f569.xlsx]

## Sheet: Table S1
Supplementary Table 1. Patient sample used for this study.
SAMPLE TYPE	NO.	SAMPLE CODE	TISSUE CODE DESCRIPTION	NAME IN CLUSTER
NORMAL_TUMOR PAIRS (9)
	1	010332N	Non-Malignant	Normal-1
	2	090658N	Non-Malignant	Normal-2
	3	030188N	Non-Malignant	Normal-3
	4	020300N	Non-Malignant	Normal-4
	5	000471N	Non-Malignant	Normal-5
	6	020185N	Non-Malignant	Normal-6
	7	050066N	Non-Malignant	Normal-7
	8	130560N	Non-Malignant	Normal-8
	9	121242N	Non-Malignant	Normal-9
ER+ TUMORS (9)
	1	010332T	Tumor ER+	ER1
	2	090658T	Tumor ER+	ER2
	3	030188T	Tumor ER+	ER3
	4	020300T	Tumor ER+	ER4
	5	000471T	Tumor ER+	ER5
	6	020185T	Tumor ER+	ER6
	7	050066T	Tumor ER+	ER7
	8	130560T	Tumor ER+	ER8
	9	121242T	Tumor ER+	ER9
TNBC TUMORS (15)
	1	047064	Tumor TNBC	TNBC1
	2	117023	Tumor TNBC	TNBC2
	3	077190	Tumor TNBC	TNBC3
	4	057282	Tumor TNBC	TNBC4
	5	047052	Tumor TNBC	TNBC5
	6	047044	Tumor TNBC	TNBC6
	7	057314	Tumor TNBC	TNBC7
	8	027055	Tumor TNBC	TNBC8
	9	037239	Tumor TNBC	TNBC9
	10	027035	Tumor TNBC	TNBC10
	11	037091	Tumor TNBC	TNBC11
	12	037170	Tumor TNBC	TNBC12
	13	037154	Tumor TNBC	TNBC13
	14	057203	Tumor TNBC	TNBC14
	15	067032	Tumor TNBC	TNBC15
PDX TOMORS (7)
WHIM30	1	JU161	PDX TNBC	WHIM30-1
	2	JU162	PDX TNBC	WHIM30-2
	3	JU232	PDX TNBC	WHIM30-3
	4	JU233	PDX TNBC	WHIM30-4
WHIM2	5	JU294	PDX TNBC	WHIM2-1
	6	JU295	PDX TNBC	WHIM2-2
	7	JU354	PDX TNBC	WHIM2-3
