# Supplementary material for: Integrated Metabolic Profiling and Gene Expression Analysis Reveals Therapeutic Modalities in Breast Cancer
Source: Research Square preprint supplement (doi:10.21203/rs.3.rs-117384/v1), 2020-12-09
Supplement: Supplementary file 5 [file bdd3851e8611fd7a5cf36c57.xlsx]

## Sheet: Table S4
Supplementary Table 4. Top 200 genes high expressed in the tumors of Nucleotide-Enriched metabolite profile
Gene Name	Entrez Gene ID	Score(d)	Numerator(r)	Denominator(s+s0)	q-value(%)	localfdr(%)
ERICH5	203111	7.46936	8.58773	1.14973	0	0.0103643
KIF18B	146909	7.10326	10.31	1.45145	0	0.0439553
SGO1	151648	6.83499	10.1381	1.48327	0	0.0674398
E2F1	1869	6.63198	8.055	1.21457	0	0.0829747
SKA3	221150	6.58464	8.81574	1.33883	0	0.0860916
KIF20A	10112	6.49425	10.0157	1.54223	0	0.0912719
MASTL	84930	6.44159	5.14826	0.799221	0	0.0937377
MYBL2	4605	6.44054	10.8761	1.68869	0	0.0937825
KIFC1	3833	6.40525	8.5512	1.33503	0	0.0951679
CKAP2L	150468	6.33821	9.36617	1.47773	0	0.0971513
TPX2	22974	6.32115	9.99795	1.58167	0	0.0975048
BIRC5	332	6.298	10.1579	1.61288	0	0.097876
E2F7	144455	6.29224	7.98926	1.2697	0	0.0979482
HJURP	55355	6.25201	9.33709	1.49345	0	0.0982167
CDC25C	995	6.21479	8.7757	1.41207	0	0.0980728
EEF1AKMT4	110599564	6.20257	6.15045	0.991598	0	0.097938
FOXM1	2305	6.16413	9.01066	1.46179	0	0.0972146
MCM10	55388	6.1636	10.2322	1.6601	0	0.0972012
PKMYT1	9088	6.15225	8.31209	1.35106	0	0.0968953
PTTG1	9232	6.14997	8.48242	1.37926	0	0.0968285
EXO1	9156	6.14028	9.63492	1.56913	0	0.0965261
SPC25	57405	6.08928	8.0233	1.31761	0	0.0943954
CDC20	991	6.08081	10.0379	1.65076	0	0.0939507
BUB1	699	6.03191	8.84618	1.46656	0	0.0908387
CDT1	81620	6.03039	7.53673	1.24979	0	0.0907267
STIL	6491	6.01048	6.31247	1.05024	0	0.0891683
AURKA	6790	6.00776	8.44041	1.40492	0	0.0889422
ESPL1	9700	5.98459	7.87968	1.31666	0	0.0868852
CDCA8	55143	5.97258	8.59845	1.43965	0	0.0857254
WDR62	284403	5.96143	7.94678	1.33303	0	0.0845878
IQGAP3	128239	5.93644	10.2026	1.71864	0	0.0818274
RAD54L	8438	5.93521	8.05014	1.35634	0	0.0816848
PRR11	55771	5.91248	7.81935	1.32252	0	0.078896
CDC45	8318	5.91094	8.51878	1.44119	0	0.0786974
DEPDC1	55635	5.8918	9.44228	1.60261	0	0.0761306
ASPM	259266	5.87825	10.3693	1.76402	0	0.0741977
CENPE	1062	5.87218	8.5731	1.45995	0	0.0733
DTL	51514	5.85905	7.45614	1.27259	0	0.071288
BRIP1	83990	5.85503	5.73956	0.980279	0	0.070653
TOP2A	7153	5.848	8.83932	1.51151	0	0.0695213
BAK1	578	5.82928	3.48658	0.598114	0	0.0663702
UBE2C	11065	5.8228	9.91623	1.703	0	0.0652315
MKI67	4288	5.81014	9.69548	1.66872	0	0.0629362
GPRIN1	114787	5.78283	7.40417	1.28037	0	0.0576563
CDC6	990	5.78074	6.89247	1.19232	0	0.0572338
NEK2	4751	5.78026	9.65697	1.67068	0	0.0571366
KIF14	9928	5.77947	10.0236	1.73434	0	0.0569765
CDCA5	113130	5.77434	7.63877	1.32288	0	0.0559219
NUF2	83540	5.76934	8.29119	1.43711	0	0.0548777
TROAP	10024	5.76674	7.69582	1.33452	0	0.0543298
HMMR	3161	5.7542	8.88712	1.54446	0	0.0516217
HASPIN	83903	5.74715	6.49152	1.12952	0	0.0500556
CCNB2	9133	5.7364	8.41593	1.46711	0	0.0476042
CCNA2	890	5.72514	8.22993	1.43751	0	0.0449531
RACGAP1	29127	5.72184	6.14343	1.07368	0	0.044162
NCCRP1	342897	5.69673	11.6124	2.03842	0	0.0378849
ORC6	23594	5.6707	7.82584	1.38005	0	0.0309101
KIF2C	11004	5.66972	8.48357	1.49629	0	0.0306377
ANLN	54443	5.65639	9.04525	1.59912	0	0.0268715
KIF4A	24137	5.64899	9.88014	1.74901	0	0.0247212
CDC25A	993	5.6483	7.44292	1.31773	0	0.0245192
MSL3P1	151507	5.61681	6.75413	1.20248	0	0.0149022
POLQ	10721	5.6087	7.47852	1.33338	0	0.0123024
CHAF1B	8208	5.60681	5.11313	0.911951	0	0.0116882
CCNB1	891	5.5882	6.80621	1.21796	0	0.00549839
CLSPN	63967	5.58439	8.36066	1.49715	0	0.0041976
SKA1	220134	5.57448	8.50439	1.52559	0	0.000760391
CIT	11113	5.5513	5.70613	1.02789	0	0
PRAME	23532	5.54987	14.7406	2.65602	0	0
MND1	84057	5.5484	7.92557	1.42844	0	0
CENPI	2491	5.53606	7.61706	1.3759	0	0
C17orf53	78995	5.53471	4.32387	0.781227	0	0
FANCB	2187	5.53332	5.64116	1.01949	0	0
GINS1	9837	5.52408	6.90755	1.25044	0	0
NCAPG2	54892	5.50335	5.02017	0.912202	0	0
AURKB	9212	5.49401	8.84958	1.61077	0	0
MELK	9833	5.49169	9.39088	1.71002	0	0
CCNE1	898	5.48936	8.65109	1.57597	0	0
APBA2	321	5.48203	5.2405	0.955943	0	0
PLK4	10733	5.47467	6.3225	1.15486	0	0
LMNB1	4001	5.46661	6.3581	1.16308	0	0
PLK1	5347	5.45798	8.17567	1.49793	0	0
SHCBP1	79801	5.45725	7.28194	1.33436	0	0
MAD2L1	4085	5.45496	7.48209	1.37161	0	0
GTSE1	51512	5.45383	7.99429	1.46581	0	0
CENPA	1058	5.43268	8.7557	1.61167	0	0
UHRF1	29128	5.42451	7.28248	1.34251	0	0
PIMREG	54478	5.41758	8.59219	1.58598	0	0
ASF1B	55723	5.41219	6.15654	1.13753	0	0
XRCC2	7516	5.40441	7.66708	1.41867	0	0
TONSL	4796	5.40111	6.89198	1.27603	0	0
ERCC6L	54821	5.39342	8.05724	1.4939	0	0
KIF23	9493	5.3926	6.89095	1.27785	0	0
GINS4	84296	5.39146	7.83682	1.45356	0	0
CENPF	1063	5.39144	8.50144	1.57684	0	0
NCAPG	64151	5.38671	7.23871	1.34381	0	0
PCLAF	9768	5.38656	7.15547	1.32839	0	0
EZH2	2146	5.37839	5.77604	1.07394	0	0
TEDC2	80178	5.37488	6.02981	1.12185	0	0
CIP2A	57650	5.36378	5.44725	1.01556	0	0
CEP55	55165	5.3426	8.04928	1.50662	0	0
FEN1	2237	5.34054	4.02519	0.753705	0	0
TUBG1	7283	5.33095	3.27834	0.614963	0	0
CDCA4	55038	5.31165	3.76219	0.70829	0	0
CDK1	983	5.2992	7.8367	1.47885	0	0
NEIL3	55247	5.29467	9.39677	1.77476	0	0
KPNA2	3838	5.28883	6.01787	1.13785	0	0
RRM2	6241	5.28415	8.01012	1.51588	0	0
LMNB2	84823	5.28276	4.56065	0.863309	0	0
CENPN	55839	5.28116	5.81906	1.10185	0	0
SPAG5	10615	5.28113	5.46834	1.03545	0	0
PSMD14	10213	5.28055	3.25996	0.617352	0	0
AUNIP	79000	5.27873	6.92425	1.31172	0	0
DLGAP5	9787	5.2726	9.12196	1.73007	0	0
E2F3	1871	5.26487	4.04377	0.768066	0	0
PSMD4	5710	5.25748	3.2605	0.620164	0	0
SRPK1	6732	5.2498	4.01307	0.764423	0	0
CBX2	84733	5.23877	8.82649	1.68484	0	0
GLDC	2731	5.22082	11.8548	2.27068	0	0
RECQL4	9401	5.21824	6.77269	1.29789	0	0
ARHGAP11A	9824	5.21822	6.95937	1.33367	0	0
TACC3	10460	5.21635	4.54507	0.871311	0	0
ALG3	10195	5.20852	3.06217	0.587916	0	0
POC1A	25886	5.20576	5.00031	0.960533	0	0
JPT1	51155	5.20429	5.03129	0.96676	0	0
CDCA2	157313	5.19867	8.67522	1.66874	0	0
E2F2	1870	5.18399	6.85217	1.32179	0	0
PARPBP	55010	5.18105	4.9685	0.958974	0	0
SAP30	8819	5.13915	4.21696	0.820555	0	0
LRFN1	57622	5.11099	5.96231	1.16657	0	0
DIAPH3	81624	5.10845	8.3072	1.62617	0	0
PDIA4	9601	5.09695	3.79428	0.744422	0	0
NUSAP1	51203	5.08211	7.00983	1.37931	0	0
CKS2	1164	5.06999	6.26917	1.23653	0	0
MRPL12	6182	5.06733	4.52742	0.893452	0	0
TK1	7083	5.0619	7.29457	1.44107	0	0
NCAPH	23397	5.05506	7.41073	1.466	0	0
UBE2SP2	440406	5.04911	6.1545	1.21893	0	0
KIF15	56992	5.04466	6.84172	1.35623	0	0
ORC1	4998	5.04313	6.51129	1.29112	0	0
CDCA3	83461	5.0422	5.88054	1.16626	0	0
RPS10-NUDT3	100529239	5.03931	5.14569	1.02111	0	0
KNL1	57082	5.03748	7.45988	1.48088	0	0
KIF11	3832	5.02629	6.40193	1.27369	0	0
BUB1B	701	5.01259	7.99049	1.59408	0	0
RFC4	5984	5.0091	3.79077	0.756778	0	0
H2AFZ	3015	5.00843	5.08685	1.01566	0	0
H2AFX	3014	5.00258	4.90761	0.981016	0	0
DEPDC1B	55789	5.0002	7.83504	1.56695	0	0
FANCA	2175	4.97298	5.75857	1.15797	0	0
E2F8	79733	4.96136	7.56128	1.52403	0	0
CDK16	5127	4.9604	3.20731	0.646583	0	0
NDC80	10403	4.95992	7.48844	1.50979	0	0
WDR4	10785	4.94907	3.86886	0.781734	0	0
RAD51AP1	10635	4.93297	6.01846	1.22005	0	0
MAGEF1	64110	4.92663	3.04638	0.618349	0	0
TIMM23	100287932	4.91542	2.68851	0.546955	0	0
CHAC1	79094	4.90398	5.34652	1.09024	0	0
HMGA1	3159	4.89771	5.76873	1.17784	0	0
ATP5MC3	518	4.89766	2.9797	0.608393	0	0
CDCA7	83879	4.89458	7.13737	1.45822	0	0
TICRR	90381	4.88145	7.0807	1.45053	0	0
BARD1	580	4.87927	3.47931	0.71308	0	0
MCM2	4171	4.87435	4.73934	0.972303	0	0
RAD51	5888	4.87126	6.36643	1.30694	0	0
CBS	875	4.86866	10.1588	2.08656	0	0
PIF1	80119	4.86706	5.99255	1.23124	0	0
SNRPC	6631	4.85687	2.76801	0.569915	0	0
ZNF695	57116	4.84864	9.68237	1.99692	0	0
PYCR1	5831	4.84006	5.89531	1.21803	0	0
UBE2SP1	246719	4.83563	6.33716	1.31052	0	0
NME1	4830	4.82874	3.68189	0.762494	0	0
SHMT2	6472	4.81736	3.52105	0.730908	0	0
SPC24	147841	4.809	6.97105	1.44958	0	0
SIM2	6493	4.80899	8.01844	1.66739	0	0
INCENP	3619	4.79159	4.48282	0.935562	0	0
HDGF	3068	4.78841	3.64996	0.762248	0	0
UBE2S	27338	4.78814	5.41629	1.13119	0	0
HCCS	3052	4.78617	3.01881	0.630735	0	0
FAM208B	54906	4.78565	4.88856	1.0215	0	0
SAPCD2	89958	4.78283	7.87265	1.64602	0	0
LOC100288637	100288637	4.78181	5.51257	1.15282	0	0
TUBBP1	92755	4.77277	3.77523	0.790993	0	0
SPDL1	54908	4.77147	4.13138	0.86585	0	0
CDK2AP1	8099	4.76981	4.13575	0.867068	0	0
TIMELESS	8914	4.76819	3.71961	0.780088	0	0
DDIAS	220042	4.76768	5.39006	1.13054	0	0
PBK	55872	4.75231	8.0695	1.69802	0	0
OLA1P1	246785	4.74815	3.34803	0.705124	0	0
RNFT2	84900	4.7391	5.24993	1.10779	0	0
KIF20B	9585	4.73057	3.49422	0.738646	0	0
SLC7A11	23657	4.7074	6.9133	1.4686	0	0
MYO3A	53904	4.70184	6.90516	1.46861	0	0
ZWINT	11130	4.69519	5.77173	1.22929	0	0
CHEK1	1111	4.69144	6.02866	1.28503	0	0
MUC16	94025	4.68971	10.2082	2.17673	0	0
RCOR2	283248	4.68912	8.4391	1.79972	0	0
EME1	146956	4.68782	5.03214	1.07345	0	0
TTK	7272	4.68192	7.65587	1.6352	0	0
FANCI	55215	4.67971	5.07009	1.08342	0	0
