# Supplementary material for: Integrated Metabolic Profiling and Gene Expression Analysis Reveals Therapeutic Modalities in Breast Cancer
Source: Research Square preprint supplement (doi:10.21203/rs.3.rs-117384/v1), 2020-12-09
Supplement: Supplementary file 7 [file db9dd61e910912128c9fcdfc.xlsx]

## Sheet: Table S2
Supplementary Table 2. Transformed quantitative metabolomics data of 40 patient samples used in this study.
			Inject Name	II_5ulN1	II_5ulN2	II_5ulN3	II_5ulN4	II_5ulN5	II_5ulN6	II_5ulN7	II_5ulN8	II_5ulN9	II_5ulT1	II_5ulT2	II_5ulT3	II_5ulT4	II_5ulT5	II_5ulT6	II_5ulT7	II_5ulT8	II_5ulT9	II_5ulPDX1	II_5ulPDX2	II_5ulPDX3	II_5ulPDX4	II_5ulPDX5	II_5ulPDX6	II_5ulPDX7	II_5ulTNBC1	II_5ulTNBC2	II_5ulTNBC3	II_5ulTNBC4	II_5ulTNBC5	II_5ulTNBC6	II_5ulTNBC7	II_5ulTNBC8	II_5ulTNBC9	II_5ulTNBC10	II_5ulTNBC11	II_5ulTNBC12	II_5ulTNBC13	II_5ulTNBC14	II_5ulTNBC15
			Sample Name	Normal-1	Normal-2	Normal-3	Normal-4	Normal-5	Normal-6	Normal-7	Normal-8	Normal-9	ER1	ER2	ER3	ER4	ER5	ER6	ER7	ER8	ER9	WHIM30-1	WHIM30-2	WHIM30-3	WHIM30-4	WHIM2-1	WHIM2-2	WHIM2-3	TNBC1	TNBC2	TNBC3	TNBC4	TNBC5	TNBC6	TNBC7	TNBC8	TNBC9	TNBC10	TNBC11	TNBC12	TNBC13	TNBC14	TNBC15
			Sample Type	Non-Malignant	Non-Malignant	Non-Malignant	Non-Malignant	Non-Malignant	Non-Malignant	Non-Malignant	Non-Malignant	Non-Malignant	Tumor ER+	Tumor ER+	Tumor ER+	Tumor ER+	Tumor ER+	Tumor ER+	Tumor ER+	Tumor ER+	Tumor ER+	PDX TNBC	PDX TNBC	PDX TNBC	PDX TNBC	PDX TNBC	PDX TNBC	PDX TNBC	Tumor TNBC	Tumor TNBC	Tumor TNBC	Tumor TNBC	Tumor TNBC	Tumor TNBC	Tumor TNBC	Tumor TNBC	Tumor TNBC	Tumor TNBC	Tumor TNBC	Tumor TNBC	Tumor TNBC	Tumor TNBC	Tumor TNBC
HMDB	Metabolite	Chemical Formaula
HMDB00034	adenine	C5H5N5		0.036	-0.107	0.23	-0.061	0.41	0.125	0.056	-0.024	0.312	-0.008	0.034	0.22	0.014	-0.106	0.413	0.027	-0.196	0.226	-0.106	-0.048	-0.162	-0.101	0.053	0.067	0.025	-0.166	-0.173	-0.281	0.513	0.02	0.265	-0.392	-0.225	-0.229	0.248	0.251	-0.032	0.281	0.36	-0.571
HMDB00257	thiosulfate	H2O3S2		0.0595	0.1545	0.0125	-0.1765	-0.2205	0.2985	-0.2985	-0.1875	0.2935	0.2725	-0.2615	-0.1875	-0.5655	0.1175	-0.1715	-0.0865	-0.1215	-1.2695	0.2595	-0.0905	-0.1055	-0.1705	0.4285	0.0445	0.0905	-0.5155	0.0045	-0.5455	0.9435	0.1565	0.0385	0.4565	-0.2865	-0.0385	0.3845	0.1485	-0.0535	-0.2845	0.0695	-0.2125
HMDB00694	2-Hydroxyglutarate	C5H8O5		0.084	-0.179	0.027	-0.198	-0.142	-0.205	-0.18	-0.193	0.044	0.04	-0.145	-0.302	-0.003	0.113	-0.143	-0.325	-0.237	1.162	0.197	0.295	0.232	0.195	0.241	0.265	0.25	0.232	0.053	0.282	-0.148	-0.321	0.743	0.048	0.204	0.409	0.024	0.358	0.212	-0.107	0.503	0.007
HMDB02092	Mesaconate	C5H6O4		-0.015	-0.154	0.081	-0.115	-0.245	-0.159	-0.19	-0.239	-0.105	-0.028	0.063	-0.279	-0.116	0	-0.224	-0.235	-0.223	0.887	0.016	0.069	0.041	-0.002	0.036	0.042	0.046	0.007	0	0.067	0.196	-0.233	0.475	-0.005	0.076	0.208	0.045	0.128	0.128	0.11	0.238	-0.027
HMDB00684	L-kynurenine/Formyl-5-hydroxykynurenamine	C10H12N2O3		-0.543	0.209	-0.448	-0.137	0.118	0.227	0.24	0.162	0.12	-0.035	0.398	0.02	-0.319	0.091	0.23	0.133	0.245	0.478	0.818	0.647	0.622	0.563	-0.496	-0.535	-0.568	0.15	0.412	0.991	0.088	-0.003	0.945	0.739	0.451	0.26	0.205	0.484	1.001	0.011	0.115	0.684
HMDB00763	5-Hydroxyindoleacetate	C10H9NO3		-0.528	0.285	-0.351	-0.039	0.226	0.328	0.337	0.223	0.221	0.046	0.467	0.096	-0.253	0.171	0.294	0.219	0.339	0.581	0.845	0.687	0.662	0.603	-0.42	-0.481	-0.515	0.194	0.493	1.08	0.15	0.092	1.048	0.8	0.519	0.341	0.281	0.567	1.089	0.076	0.193	0.778
HMDB01201	GDP	C10H15N5O11P2		-0.7965	0.0285	-0.3655	0.0845	-0.0535	0.0035	-0.2865	0.2205	-0.3815	-0.4555	0.1555	0.2185	0.1865	0.2465	0.0905	-0.0595	-0.0615	-0.0995	0.2575	0.3665	0.3855	0.3525	0.5655	0.6295	0.5985	0.2905	0.1015	-0.0685	-0.3265	-0.6745	0.2225	0.4725	0.1085	0.2655	0.0695	0.1925	0.0425	0.1765	0.4275	-0.1485
HMDB00286	UDP-D-glucose/UDP-D-galactose	C15H24N2O17P2		-0.457	-0.107	-0.181	-0.096	-0.19	-0.259	-0.503	-0.188	-0.108	-0.546	-0.074	-0.147	-0.073	0.136	-0.259	-0.318	-0.187	-0.254	0.355	0.631	0.638	0.61	0.337	0.523	0.442	0.216	-0.036	-0.052	-0.256	-0.221	0.23	0.064	-0.178	0.097	0.08	0.353	-0.022	0.146	0.511	-0.754
HMDB00935	UDP-D-glucuronate	C15H22N2O18P2		-0.785	-0.495	-0.424	-0.366	-0.743	-0.225	-0.875	0.326	-0.239	-0.867	-0.294	-0.115	0.054	0.052	0.009	-0.487	-0.425	-0.188	0.357	0.587	0.588	0.517	0.64	0.594	0.403	-0.034	-0.388	0.1	-0.528	-0.557	0.112	0.276	-0.475	-0.045	-0.042	0.451	-0.43	0.123	0.561	0.317
HMDB01546	CDP	C9H15N3O11P2		-0.9695	-0.0175	-0.5955	0.0595	-0.7855	-0.1165	-0.6945	0.0175	-1.0195	-0.8055	0.0935	0.0255	0.2145	0.1875	-0.0895	-0.1385	-0.3595	-0.5955	0.1815	0.1865	0.4145	0.3165	0.6925	1.0055	1.0965	0.2455	0.0005	-0.2325	-0.1795	-0.8405	-0.4615	0.1905	-0.0445	0.3105	0.0695	-0.3985	-0.0575	0.2235	0.0755	-0.4805
HMDB00295	UDP	C9H14N2O12P2		-0.9095	-0.0455	-0.4805	0.1155	-0.5265	-0.1665	-0.4185	0.2235	-0.6135	-0.6515	0.2195	0.1765	0.2725	0.3005	0.0085	-0.1385	-0.2975	-0.2165	0.4505	0.6875	0.8135	0.6935	0.5345	0.7905	0.8245	0.0215	0.0075	-0.3295	-0.4555	-0.8985	-0.0425	0.2725	0.1165	0.1875	0.0835	0.0555	-0.1575	0.1505	0.3545	-0.3165
HMDB01341	ADP	C10H15N5O10P2		-0.9485	-0.1035	-0.6585	0.0535	-0.4455	-0.1675	-0.3775	0.3615	-0.7065	-0.7645	0.2865	0.2235	0.2385	0.3495	0.1935	0.0175	-0.2155	-0.0365	0.2945	0.4675	0.4925	0.3855	-0.0485	0.1455	0.3625	0.2335	0.0655	-0.3825	-0.7085	-0.8835	-0.0945	0.4145	0.2725	0.1335	0.0235	0.0555	0.1805	-0.0355	0.2955	-0.3915
HMDB01163	GDP-D-mannose	C16H25N5O16P2		-1.346	-0.517	-1.977	-0.258	-0.504	-0.136	-0.853	0.086	-0.469	-0.54	0.174	0.125	-0.042	0.251	0.151	-0.141	-0.349	0.32	0.108	0.194	0.161	0.135	0.129	0.078	-0.011	0.145	0	0.186	-0.296	-0.492	0.51	0.259	0.037	0.064	-0.04	0.354	0.128	0.018	0.398	-0.026
HMDB01018	UDP-alpha-D-xylose	C14H22N2O16P2		-1.097	-0.167	-0.457	-0.138	-0.375	-0.192	-0.427	0.076	-0.18	-0.549	0.23	0.263	-0.046	0.299	0.07	-0.001	-0.237	0.06	-0.191	0.122	0.094	0.125	0.183	0.212	0.127	0.145	-0.09	0.226	-0.312	-0.318	0.374	0.09	-0.132	-0.164	-0.109	0.414	0.076	0.225	0.349	0.176
HMDB06369	ADP-mannose/GDP-L-fucose/ADP alpha-D-glucoside	C16H25N5O15P2		-0.9345	-0.4325	-0.6465	-0.3105	-0.3145	-0.1415	-0.8505	0.0425	-0.2665	-0.5825	0.0735	-0.0885	-0.2055	0.0625	-0.0245	-0.2535	-0.3345	-0.0245	-0.0755	0.0325	0.0825	0.0135	0.2415	0.1215	0.0545	0.1545	-0.1065	0.0995	-0.2815	-0.4105	0.3975	0.2355	-0.0405	-0.0255	-0.1245	0.2925	0.1005	0.0505	0.2855	0.3375
HMDB01553	2-keto-4-methylthiobutyrate	C5H8O3S		0.0445	0.1055	0.5785	-0.0975	-0.4325	0.3795	0.3865	-0.5655	0.2185	0.4605	-2.3075	-0.3085	-0.3175	-2.1095	-0.8425	-0.0285	0.1995	0.7735	-0.0985	-0.5735	-0.2615	-0.7265	-0.0795	-0.1775	0.0785	-0.7825	0.4605	-0.4005	0.6015	0.0115	-0.4335	0.0215	-0.0805	-0.1465	0.4195	-0.9125	0.2455	0.1905	-0.2175	-2.2245
HMDB00214	Ornithine	C5H12N2O2		-0.118	0.22	-0.073	-0.068	0.023	0.068	0.232	-0.213	0.221	0.034	-0.085	-0.075	-0.232	-0.382	-0.206	0.057	0.069	-0.084	0.633	0.068	0.053	-0.082	-0.145	-0.012	0.094	-0.291	-0.311	-0.251	0.086	0.058	-0.219	-0.261	-0.267	-0.104	-0.101	-0.184	-0.254	-0.25	-0.219	-0.415
HMDB00026	Ureidopropionic acid/Glycyl-glycine	C4H8N2O3		-0.0785	0.0775	-0.2245	-0.0595	-0.0735	0.0075	0.1505	0.0865	-0.0015	0.0635	-0.1185	-0.0325	-0.1165	-0.1125	-0.0185	0.0825	0.0935	0.0335	-0.0305	-0.1985	-0.1685	-0.1915	-0.2395	-0.2685	-0.3005	-0.0205	0.0675	0.1245	0.0325	0.0185	0.0255	-0.0465	0.1395	-0.0675	0.0345	0.0965	0.1585	0.0095	-0.0115	0.0555
HMDB00168	L-asparagine	C4H8N2O3		-0.077	0.078	-0.223	-0.058	-0.073	0.008	0.152	0.088	-0.001	0.064	-0.117	-0.031	-0.115	-0.111	-0.017	0.084	0.094	0.035	-0.029	-0.197	-0.167	-0.19	-0.238	-0.267	-0.299	-0.019	0.069	0.126	0.033	0.02	0.027	-0.045	0.14	-0.066	0.036	0.098	0.16	0.011	-0.01	0.057
HMDB00250	Diphosphate	H4O7P2		-0.243	-0.34	-0.387	-0.243	-0.552	-0.301	-0.057	-0.023	-0.584	-0.62	-0.166	0.204	-0.073	-0.279	-0.027	0.006	-0.193	-0.024	0.019	0.128	0.127	0.118	0.368	0.325	0.309	0.18	-0.073	0.367	-0.261	-0.289	0.371	0.231	0.085	-0.348	-0.198	0.399	0.191	0.197	0.281	0.178
HMDB01248	Flavin adenine dinucleotide oxidized	C27H33N9O15P2		-0.677	0.095	-1.274	0.2	-0.491	0.107	0.165	0.309	-0.475	-0.182	0.374	0.235	0.309	0.192	0.198	0.366	0.029	0.343	-0.294	-0.236	-0.105	-0.197	-0.081	-0.066	-0.072	-0.137	0.137	0.16	-0.413	0.097	0.276	0.364	0.236	-0.161	0.162	0.008	0.24	0.235	0.308	0.347
HMDB29738	methyl indole-3-acetate	C11H11NO2		0.8725	0.0585	1.0295	-0.1395	-0.2075	0.1745	0.0675	-0.0435	0.1115	-0.0185	-0.0275	-0.1335	-0.2455	-0.2085	0.0195	0.0585	0.0335	0.1975	-0.0405	-0.1075	-0.1035	-0.2155	-0.0235	-0.0825	-0.0955	-0.1435	-0.0465	0.0765	0.0605	-0.0535	0.1245	-0.2405	0.0185	-0.2025	-0.0705	0.1125	0.0925	-0.2215	-0.0345	0.0725
HMDB13333	3-hydroxyhexadecenoylcarnitine	C23H43NO5		1.6875	0.1505	1.3025	0.4975	0.9105	0.9025	0.3885	-0.3835	0.1325	1.3615	0.2135	0.3875	0.2225	0.9665	0.6595	0.2055	-0.0175	0.0125	-0.5095	-0.3635	-0.5405	-0.2745	-0.2485	-0.4795	-0.2095	-0.1285	-0.0185	-0.0515	0.5155	-0.0485	-0.1215	-0.1455	-0.2975	0.4395	0.4445	-0.3215	-0.1645	0.2885	-0.5075	0.0565
HMDB29751	naphthalene	C10H8		1.3475	0.4835	1.1215	0.1635	0.6265	0.7365	0.5695	0.0795	0.4325	0.3505	-0.1715	-0.0255	0.1545	0.1565	-0.0635	0.2355	0.2825	-0.1595	-0.2455	-0.2035	-0.4115	-0.3175	-0.0375	-0.0625	0.0135	-0.3845	-0.0475	-0.0875	0.8305	0.2055	-0.1335	-0.0825	-0.2845	0.1115	0.0265	-0.0835	0.0295	-0.1855	-0.2125	0.2535
HMDB00721	Glycylproline/L-Prolinylglycine	C7H12N2O3		0.396	0.1	0.379	-0.035	-0.019	0.042	0.115	1.344	0.158	0.505	-0.172	0.074	-0.012	-0.127	0.706	0.066	0.482	0.271	-0.284	-0.451	-0.217	-0.251	-0.104	-0.127	-0.089	-0.067	-0.076	0.229	0.935	0.295	0.104	-0.128	0.212	0.052	0.321	-0.201	0.263	-0.021	-0.09	0.262
HMDB06471	Methylisocitric acid/2-methylcitrate	C7H10O7		0.2905	0.0885	0.1165	0.6455	0.3125	0.1755	0.1275	0.4055	0.2285	0.4905	0.0065	0.0595	0.5705	0.3315	0.7005	0.0025	0.2095	0.5095	-0.3785	-0.3395	-0.3565	-0.4005	-0.1105	0.4055	0.3045	-0.1525	0.3355	-0.0175	0.2415	0.1345	0.3485	0.4295	0.1235	0.0115	0.1625	0.1165	0.0025	0.1585	0.1685	0.8495
HMDB00072	cis-aconitate	C6H6O6		-0.129	0.162	0.004	0.146	-0.119	0.124	0.04	0.196	-0.041	0.047	-0.02	-0.02	0.088	0.091	0.02	0.068	0.073	0.321	0.052	0.004	0.066	0.022	-0.031	0	0.068	-0.179	0.193	-0.018	0.267	0.001	0	0.496	0.283	0.073	0.192	-0.157	0.241	0.478	-0.029	0.135
HMDB01422	3-Hydroxy-N6N6N6-trimethyl-L-lysine	C9H20N2O3		0.377	0.264	0.026	0.189	-0.076	0.138	0.285	0.512	-0.1	0.552	0.592	0.735	0.272	0.46	0.377	0.393	0.198	0.104	-0.679	-0.355	-0.546	-0.56	-0.363	-0.227	-0.082	0.413	0.025	0.341	0.058	-0.106	0.715	0.214	0.169	-0.076	0.168	0.21	0.245	0.173	0.324	0.272
HMDB06488	2-acetamido-5-oxopentanoate	C7H11NO4		0.1355	-0.2055	0.1815	-0.1935	0.0775	0.0575	-0.2725	-0.1055	0.1005	0.0835	-0.0505	0.2085	0.0765	0.0635	-0.0235	-0.1595	-0.2495	-0.1815	-0.3015	-0.0025	0.0125	-0.1105	-0.3075	-0.5825	-0.8595	0.1465	-0.1755	0.1005	-0.0015	-0.3585	0.8315	0.1015	-0.2935	0.0985	-0.0555	0.4595	-0.0145	0.1745	0.4025	0.1345
HMDB28848	Glycyl-phenylalanine	C11H14N2O3		0.109	0.245	0.883	-0.049	-0.594	0.709	0.061	-0.347	-0.389	0.651	0.406	0.427	-0.145	-0.559	0.284	-0.111	-0.124	0.372	-0.313	-0.192	-0.877	-0.185	-0.697	-0.618	-0.372	0.477	-0.112	0.386	0.881	0.522	0.906	0.038	0.306	-0.036	-0.107	0.353	0.275	-0.001	0.454	0.476
HMDB00252	sphingosine/(2S)-1-hydroxy-3-oxooctadecan-2-aminium	C18H37NO2		0.2305	0.3585	0.4575	-0.1745	0.4185	0.1095	0.0465	0.1725	0.5235	-0.1245	-0.3635	0.2465	-0.1425	0.1205	0.4295	-0.0055	0.2395	-0.0415	-0.1355	-0.3685	-0.4735	-0.4275	-0.1905	-0.2715	0.0655	0.2535	0.5845	0.6825	-0.8955	0.4285	0.3005	-0.0535	0.3765	0.2405	0.0115	0.1245	0.1695	0.0475	0.0745	0.0885
HMDB00192	Cystine	C6H12N2O4S2		0.384	0.963	0.545	-0.029	0.513	0.931	0.814	-0.399	1.146	1.043	-2.542	-0.302	-1.406	0.039	0.362	-2.139	0.694	0.614	-0.073	-0.964	-1.328	-1.097	-0.851	-1.199	-1.556	0.632	0.409	-0.736	1.184	1.009	0.288	0.052	0.263	0.395	0.712	0.469	-0.154	-0.061	-0.113	1.119
HMDB02231	Eicosenoic acid	C20H38O2		0.2455	0.3205	0.6315	0.3165	0.8905	0.5165	-0.1585	0.2575	0.7625	0.5635	-0.3325	-0.1435	-0.0085	-0.2455	0.4365	-0.1005	0.6015	0.2175	0.0685	-0.6155	-0.5545	-0.5055	0.5275	0.0535	0.2705	0.4735	0.6105	0.7675	0.4485	1.2095	0.3005	-0.2155	0.3105	1.0815	0.2555	0.0465	-0.4875	0.0915	0.2365	0.2675
HMDB04701	9(10)-EpOME/12(13)-EpOME	C18H32O3		0.822	0.76	1.219	0.517	0.729	0.76	0.382	0.008	0.476	1.067	0.237	0.149	0.598	0.241	0.17	0.199	0.445	0.089	-0.082	-0.322	-0.394	0.027	0.028	-0.004	0.196	-0.001	0.401	0.305	0.838	0.428	-0.158	0.087	0.016	0.502	0.316	-0.208	-0.112	0.239	-0.149	0.399
HMDB00827	stearate	C18H36O2		-0.135	0.157	0.15	0.086	0.319	-0.074	0.151	0.118	0.207	0.073	-0.13	-0.011	0.017	-0.133	0.152	0.016	0.354	-0.293	0.161	-0.226	-0.255	-0.084	0.271	0.002	0.181	0.034	0.268	0.162	0.06	0.386	-0.19	0.074	0.105	0.451	0.187	0.054	-0.042	0.211	0.012	0.026
HMDB00220	palmitate	C16H32O2		-0.034	0.359	0.276	0.297	0.58	0.373	0.12	0.206	0.458	0.465	0.002	0.055	0.131	-0.126	0.223	-0.032	0.447	-0.213	0.077	-0.288	-0.26	-0.012	0.099	-0.165	-0.002	0.075	0.403	0.199	0.269	0.498	-0.138	0.163	0.065	0.49	0.227	0.074	-0.126	0.211	-0.013	0.027
HMDB06294	omega hydroxy hexadecanoate (n-C16:0)	C16H32O3		0.0825	0.1735	0.2965	0.1325	0.1255	0.0905	-0.0615	-0.2145	-0.0005	0.1935	-0.0345	0.0735	0.0895	0.0975	0.0595	0.1615	0.0555	0.2115	0.2595	-0.4205	-0.3795	-0.1845	-0.0075	-0.2545	-0.0485	0.3565	-0.0015	0.4205	1.2125	-0.0175	0.2265	0.3175	0.1035	0.2395	0.1695	-0.2905	0.2925	0.3735	0.4205	0.5835
HMDB02259	margarate	C17H34O2		0.0295	0.4075	0.3055	0.2065	0.6425	0.2315	0.1745	0.1105	0.4425	0.4245	0.0015	-0.0145	0.0325	-0.0655	0.0735	0.0345	0.4495	-0.0485	-0.0845	-0.3305	-0.3695	-0.1875	0.1465	-0.0085	0.1735	0.1265	0.3825	0.2845	0.4305	0.5185	0.0255	-0.0105	0.0955	0.5315	0.2765	0.0225	-0.1175	0.1565	-0.0015	0.5035
HMDB00806	myristate	C14H28O2		0.1645	0.2045	0.2745	0.0915	0.4205	0.1195	0.2845	0.1075	0.3545	0.1865	-0.1645	-0.1135	0.0065	0.2285	-0.0555	0.0515	0.2575	-0.1835	-0.0435	0.1785	0.0015	0.0805	-0.3125	-0.0885	0.0925	0.0005	0.1885	-0.0365	0.2265	0.2055	-0.2625	-0.0065	0.0535	0.1835	0.2205	-0.0775	0.0755	0.1935	-0.1005	-0.1465
HMDB06009	isoputreanine/putreanine	C7H16N2O2		0.031	0.151	0.11	-0.1	0.175	0.081	0.044	0.036	0.184	0.243	0.019	0.183	-0.169	-0.066	-0.148	-0.034	0.07	-0.007	0.202	0.129	0.212	0.13	0.181	0.116	0.205	0.403	-0.041	0.307	0.088	0.292	-0.005	0.462	-0.287	0.369	-0.244	0.192	-0.062	-0.036	-0.06	-0.227
HMDB00020	4-Hydroxyphenylacetate/2-Hydroxyphenylacetate/3,4-Dihydroxyphenylacetaldehyde	C8H8O3		0.4085	0.2115	0.7225	0.1965	0.5365	0.4235	0.5975	-0.1085	0.4335	0.5405	0.0425	0.0405	0.2245	-0.0035	-0.1105	0.1705	0.2905	0.0935	-0.4405	-0.4525	-0.3595	-0.2955	-0.3335	-0.2455	-0.1265	0.9635	0.1175	-0.1665	2.3865	1.5155	0.1285	1.1205	-0.0585	0.1545	0.2505	-0.3755	0.0145	0.0465	1.8405	0.6205
HMDB00784	Azelaic acid	C9H16O4		0.965	1.137	1.687	1.084	1.058	1.168	0.376	0.134	0.494	1.381	1.319	1.114	1.045	0.716	0.783	0.122	0.162	-0.012	0.583	0.503	0.589	1.152	0.622	0.404	0.824	-0.157	0.222	-0.226	1.119	0.474	0.128	0.206	-0.087	0.381	0.216	-0.427	-0.143	0.067	-0.033	0.138
HMDB05045	15(S)-Hydroxyeicosatrienoic acid	C20H34O3		0.68	-0.03	0.509	0.021	0.041	-0.092	0.331	-0.143	-0.004	0.145	-0.095	0.033	0.196	0.175	0.158	0.172	0.244	0.037	0.386	-0.019	-0.055	-0.03	1.042	0.969	0.995	0.192	0.043	0.12	0.347	-0.354	0.409	0.144	0.399	-0.031	0.062	0.417	0.129	0.105	0.419	1.034
HMDB01178	ADP-ribose	C15H23N5O14P2		0.003	-0.092	0.02	0.158	0.35	0.358	0.38	-0.09	0.038	0.177	-0.533	0.155	0.417	-0.021	0.188	0.156	-0.067	0.201	0.175	0.108	-0.124	-0.258	0.325	0.25	0.095	-0.352	0.117	0.358	0.275	0.52	0.919	0.756	-0.003	0.383	0.526	0.124	0.528	0.837	0.588	-0.475
HMDB06535	beta-1-4-mannose-N-acetylglucosamine	C14H25NO11		0.525	0.23	0.561	0.279	0.26	0.1	0	-0.354	0.034	0.618	-1.006	-0.357	-0.248	-0.101	-0.503	0.016	0.1	-0.219								-0.786	0.197	-0.078	0.257	0.138	0.338	0.186	-1.129	-0.204	-0.174	-0.026	0.185	0.27	-0.294	0.203
HMDB00211	myo-inositol	C6H12O6		0.327	0.285	0.309	0.348	0.49	0.175	0.311	0.015	0.22	0.165	-0.23	-0.032	0.296	0.219	0.042	0.42	0.217	-0.411	0.064	0.2	0.255	0.246	0.247	0.243	0.131	0.167	0.355	0.02	0.074	0.387	0.152	0.107	0.145	0.201	0.221	0.441	0.148	0.178	0.198	-0.057
HMDB05175	(4-hydroxy-3-methoxyphenyl)acetaldehyde	C9H10O3		0.1695	-0.0775	0.1075	0.0645	-0.0995	0.2415	0.3085	-0.1805	0.1865	0.4675	0.3455	-0.2355	0.0555	-0.2475	0.4895	0.1645	0.1435	0.3325	0.4015	0.2555	0.5545	0.3625	0.1465	0.0035	0.1655	0.0665	-0.3395	0.5825	0.5745	-0.2365	0.2045	0.0025	-0.0275	-0.1785	-0.1225	0.3705	0.0515	-0.0065	0.0095	0.2475
HMDB01385	3-Keto-beta-D-galactose/L-Gulonolactone	C6H10O6		1.0465	0.3495	1.1535	0.6135	0.4665	0.3085	0.9825	0.0825	0.6535	0.9135	0.6605	0.0265	0.8065	-0.0255	-0.1775	0.6185	0.1115	0.2875	-0.2495	0.0255	0.0795	-0.0135	-0.1975	-0.3575	-0.3825	0.2285	0.0375	0.2085	0.5375	0.2305	-0.3655	-0.2405	-0.3125	0.0365	0.1795	-0.0445	-0.0695	0.4405	-0.3635	0.1895
HMDB06334	3-dehydro-L-gulonate/D-glucuronate/L-iduronate	C6H10O7		0.8375	0.5335	0.3145	0.3735	0.3505	0.4895	0.4625	0.0025	0.6315	1.0135	0.0785	-0.1375	-0.0185	-0.0095	-0.0045	0.1375	0.2925	0.1915	0.0955	0.0105	0.1735	0.0925	-0.2135	-0.3305	-0.1835	-0.1165	0.3335	-0.1515	0.3565	0.4115	-0.4225	0.0905	-0.0025	0.0535	0.2475	-0.2475	0.0565	0.3865	-0.1045	0.5295
HMDB60256	L-xylonate/L-lyxonate	C5H10O6		0.624	0.056	0.14	0.265	0.165	0.046	0.18	-0.042	0.265	0.811	-0.07	-0.067	0.087	0.332	-0.079	0.052	0.118	-0.037	-0.163	-0.061	-0.109	-0.143	-0.005	0.066	0.115	0.122	0.067	0.103	0.089	-0.019	0.071	-0.027	-0.121	-0.028	0.097	0.023	-0.187	0.368	-0.112	0.209
HMDB04096	5-Methoxyindoleacetate	C11H11NO3		-0.277	0.009	-0.404	0.034	-0.561	0.126	0.105	-0.403	-0.123	0.089	0.049	-0.299	0.011	-0.321	0.069	-0.024	-0.024	0.034	0.438	0.165	0.137	0.053	0.068	0.041	0.138	0.061	-0.515	0.041	0.02	-0.376	-0.253	-0.281	-0.187	-0.494	0.14	-0.062	-0.169	-0.038	-0.451	-0.416
HMDB00033	carnosine	C9H14N4O3		0.9155	-0.1585	0.0035	-0.1115	-0.0745	-0.0035	0.5875	0.0035	-0.4365	-0.2515	-0.3345	0.0635	0.0535	0.0855	0.1325	0.7005	-0.0835	-0.4195	-0.2425	0.4435	-0.1315	0.2345	0.0995	0.1395	-0.3115	-0.0485	0.0225	-0.1565	-0.3295	0.2315	0.2435	0.3605	-0.3105	-0.2135	0.2605	-0.7495	0.1265	0.0595	-0.2315	0.2705
HMDB00094	citrate/isocitrate	C6H8O7		-0.493	0.057	-0.355	0.076	-0.319	-0.034	-0.078	0.109	-0.306	-0.227	-0.024	-0.033	0.064	0.077	0.047	0.014	-0.006	-0.195	0.242	0.22	0.268	0.239	0.017	0.092	0.051	-0.048	0.029	-0.102	0.082	-0.017	-0.109	0.108	0.18	0.121	0.08	-0.05	0.107	0.157	-0.019	0.001
HMDB00097	choline	C5H13NO		-0.0705	0.0775	-0.1365	-0.0175	0.0285	0.1155	0.0885	0.0755	0.1565	-0.0815	-0.1115	-0.1495	-0.0355	-0.0315	0.2145	0.0445	0.1065	-0.1885	0.0515	-0.0285	0.0945	0.1385	-0.0065	-0.0445	-0.0405	-0.0855	0.1575	0.0945	-0.1255	0.0785	-0.1665	0.1905	0.1375	0.0565	0.0065	0.1265	0.0625	0.0845	0.0275	0.0595
HMDB00174	HMDB00174	L-fucose/L-Fuculose		0.75	0.111	0.332	0.141	0.244	0.446	0.175	-0.402	0.319	0.849	-0.275	-0.461	-0.147	-0.216	-0.257	-0.102	-0.091	0.007	-0.475	-0.535	-0.536	-0.621	-0.449	-0.458	-0.37	-0.574	1.254	-0.159	0.409	0.173	-0.242	-0.323	-0.163	-0.068	0.255	-0.069	-0.337	-0.219	-0.164	0.174
HMDB00017	4-pyridoxate	C8H9NO4		1.169	0.463	-0.154	0.36	0.167	0.126	-0.019	-0.091	0.179	1.595	-0.189	-0.333	0.138	-0.248	-0.329	-0.29	0.362	-0.339	-0.011	-0.041	0.007	-0.174	-0.053	-0.15	-0.054	-0.619	-0.152	-0.438	0.291	-0.245	-0.575	-0.672	-0.419	-0.108	0.186	-0.179	-0.198	0.071	-0.607	-0.311
HMDB02820	Methylimidazoleacetic acid	C6H8N2O2		1.02	0.199	0.58	0.252	0.39	0.17	0.081	-0.086	0.65	1.218	-0.672	-0.396	-0.185	-0.036	-0.024	-0.383	0.326	0.553	-0.56	-0.663	-0.379	-0.565	-0.414	-0.335	-0.277	-0.364	-0.051	-0.731	0.238	0.554	-0.357	-0.696	-0.431	-0.104	0.216	-0.402	-0.323	-0.332	-0.765	-0.422
HMDB12884	adrenochrome/N-benzoylglycinate	C9H9NO3		1.0815	0.7315	0.0815	0.3775	-0.4965	0.0275	0.4795	0.1055	0.1225	1.3755	0.1445	-0.1145	0.2565	-0.6025	-0.4585	0.2085	0.4325	0.0535	-0.0045	-0.0495	-1.3455	-1.5865	-0.1565	0.0235	0.0425	-0.4335	-1.0245	-0.1515	0.3775	-0.2085	-0.9435	0.1695	-0.2485	-0.3495	0.3175	-0.0115	-0.2945	0.0475	-0.6515	0.1155
HMDB00896	Taurodeoxycholic acid/taurochenodeoxycholate	C26H45NO6S		-1.512	-0.181	-1.429	1.097	-0.329	0.884	0.786	0.719	-0.019	0.377	-1.387	-0.538	0.226	0.502	-0.363	0.339	1.351	-0.101	-0.03	-0.398	-0.192	-0.326	-0.591	-0.309	0.151	-0.73	0.577	-1.074	0.496	-0.575	-2.297	0.058	-0.828	-2.242	0.019	-0.706	-0.836	0.128	-0.788	-0.357
HMDB00217	NADP+	C21H28N7O17P3		-1.3905	0.1135	-1.3075	0.1605	-0.2815	0.2065	-0.7225	0.1095	-0.3295	-0.4075	0.0785	0.0265	0.3075	0.3175	0.1605	0.0605	-0.4205	0.1445	-0.1645	-0.6535	-0.3775	-0.3175	-0.0365	-0.3595	-0.0625	0.0575	0.1715	-0.4835	-0.1535	-0.1665	-0.1605	0.1185	-0.1945	0.1855	0.2105	0.0695	-0.0115	0.2415	0.3915	-0.3625
HMDB00623	Dodecanedioic acid	C12H22O4		0.407	0.449	0.884	0.192	0.522	0.396	0.119	-0.463	0.185	0.62	0.403	0.235	0.183	0.058	-0.108	-0.195	-0.259	-0.25	-0.202	-0.256	-0.336	0.058	-0.235	-0.242	0.103	-0.537	-0.191	-0.295	0.28	-0.016	-0.494	-0.521	-0.576	-0.299	-0.269	-0.685	-0.403	-0.314	-0.503	-0.445
HMDB04362	4-hydroxy-2-nonenal/3,4-epoxynoal	C9H16O2		0.6435	0.2725	0.4455	0.2665	0.5075	0.1805	0.3725	-0.0705	0.3435	0.5655	0.0785	-0.0455	-0.0745	0.2505	-0.2785	-0.0005	0.2285	-0.0945	-0.4455	-0.5405	-0.3945	-0.3135	-0.5125	-0.3155	-0.1355	-0.2115	0.0255	-0.4585	0.4815	-0.0085	-0.3285	-0.2395	-0.3495	-0.0475	0.2235	-0.4575	-0.1475	-0.0065	-0.3325	-0.1575
HMDB00209	phenylacetate/(4-hydroxyphenyl)acetaldehyde	C8H8O2		-0.075	-0.159	0.251	-0.308	0.17	-0.013	-0.032	-0.429	0.029	0.021	-0.283	-0.286	-0.38	-0.512	-0.425	-0.385	-0.255	-0.357	-0.737	-0.702	-0.606	-0.369	-0.52	-0.544	-0.315	-0.49	-0.105	-0.509	-0.045	-0.095	-0.594	-0.445	-0.584	-0.232	-0.173	-0.684	-0.365	-0.355	-0.418	-0.507
HMDB00847	nooate	C9H18O2		0.349	0.374	0.52	0.142	0.399	0.422	0.259	-0.109	0.3	0.717	0.405	0.226	0.106	0.264	0.25	-0.108	0.051	-0.172	-0.104	-0.236	-0.093	0.174	-0.061	0.007	0.225	-0.317	0.067	-0.411	0.211	0.1	-0.432	-0.24	-0.323	0.04	0.203	-0.585	-0.204	0.012	-0.329	-0.333
HMDB00511	caprate	C10H20O2		0.128	0.345	0.326	0.163	0.444	0.076	0.198	0.043	0.337	0.297	0.118	-0.05	-0.004	0.031	-0.092	0.033	0.255	-0.015	0.312	-0.47	-0.449	-0.395	-0.139	-0.156	0.004	0.077	0.134	0.011	0.333	0.11	-0.35	-0.11	0.19	0.102	0.2	-0.323	-0.048	0.088	-0.175	-0.163
HMDB03647	perillyl aldehyde	C10H14O		0.346	0.304	0.525	0.187	0.565	0.134	0.342	-0.212	0.358	0.371	-0.096	-0.067	-0.025	-0.096	-0.262	0.04	0.092	-0.09	-0.412	-0.378	-0.431	-0.273	-0.253	-0.405	-0.141	-0.309	0.097	-0.203	0.808	0.22	-0.2	-0.104	-0.176	0.123	0.113	-0.321	-0.081	-0.007	-0.368	0.065
HMDB03375	limonene/(+)-alpha-pinene	C10H16		0.321	0.335	0.465	0.187	0.606	0.153	0.412	-0.119	0.419	0.4	-0.247	-0.075	-0.011	-0.056	-0.231	0.128	0.168	-0.053	-0.407	-0.405	-0.431	-0.369	-0.226	-0.311	-0.072	-0.237	0.122	-0.047	0.842	0.242	-0.101	-0.083	-0.125	0.194	0.194	-0.229	-0.009	-0.035	-0.374	0.111
HMDB12535	12S-HHT	C17H28O3		0.33	0.346	0.627	0.175	0.668	-0.237	0.272	-0.342	0.099	0.448	-0.221	0.052	0.034	-0.13	-0.351	-0.074	-0.144	-0.368	-0.412	-0.349	-0.444	-0.294	-0.215	-0.143	-0.004	-0.445	0.043	-0.279	0.251	0.087	-0.394	-0.34	-0.257	0.062	-0.098	-0.307	-0.09	-0.229	-0.372	0.084
HMDB12515	11'-Carboxy-alpha-chromanol	C16H22O4																				-0.5275	-0.2235	-0.5235	-0.6075	-0.6745	-0.7145	-0.4035	-0.4025	0.2115	-0.2075	0.2045	-0.0705	0.0105	-0.3305	-0.0235	-0.0105	-0.0165	-0.2615	0.0775	0.1475	-0.2965	-0.1815
HMDB00801	phytanic acid/arachidic acid	C20H40O2		-0.2305	0.1815	0.1835	0.0905	0.4435	-0.1265	0.0375	-0.0925	0.2005	0.0425	-0.2365	-0.2785	-0.1185	-0.1975	-0.2285	-0.1965	0.2945	-0.6275	-0.1055	-0.5675	-0.7985	-0.5755	0.1415	-0.3385	-0.0685	0.0265	0.0465	0.3505	0.3885	0.2265	-0.4445	-0.4495	0.0695	0.5525	-0.0525	-0.3035	-0.4235	-0.0265	-0.0605	-0.0995
HMDB00826	pentadecanoate	C15H30O2		0.231	0.486	0.473	0.242	0.729	0.317	0.22	0.083	0.49	0.545	0.183	0.089	0.07	-0.016	0.08	0.024	0.422	-0.004	-0.111	-0.225	-0.257	-0.034	-0.063	-0.056	0.107	0.004	0.255	0.196	0.485	0.31	0.117	-0.03	-0.025	0.356	0.212	-0.017	-0.069	0.074	-0.109	0.396
HMDB00795	pristanic acid	C19H38O2		-0.0425	0.2425	0.2815	0.1055	0.5155	0.0825	0.1675	-0.0655	0.3255	0.2745	-0.0875	-0.1445	-0.0745	-0.1435	-0.0695	-0.0155	0.3145	-0.0115	-0.0865	-0.6195	-0.6135	-0.4285	0.2675	-0.0205	0.2645	-0.0325	0.1555	0.2645	0.3025	0.4605	-0.1535	-0.3315	0.2585	0.5245	0.0475	-0.2445	-0.2845	0.0635	-0.0925	0.5405
HMDB04704	9,10-hydroxyoctadec-12(Z)-enoate/12,13-hydroxyoctadec-9(Z)-enoate	C18H34O4		0.701	0.776	1.115	0.506	0.69	0.634	0.514	-0.102	0.383	0.835	0.637	0.477	0.547	0.345	0.178	0.321	0.387	0.008	-0.024	-0.048	-0.05	0.447	0.105	-0.053	0.351	0.169	-0.008	-0.127	0.978	0.263	-0.404	0.13	-0.088	0.356	0.332	-0.583	-0.031	0.26	-0.147	0.129
HMDB00638	laurate	C12H24O2		0.495	0.512	0.744	0.29	0.598	0.2	0.157	0.162	0.528	0.434	0.385	0.05	0.026	0.065	-0.1	0.03	0.442	-0.113	0.204	-0.3	-0.408	-0.241	-0.266	-0.291	-0.072	-0.102	0.125	0.008	0.56	0.184	-0.403	0.186	0.002	0.224	0.11	-0.33	-0.181	0.118	0.015	-0.217
HMDB00672	Hexadecanedioic acid	C16H30O4		1.325	0.627	1.041	0.342	0.707	0.603	0.367	-0.24	0.355	0.583	0.36	0.255	0.198	0.104	-0.099	0.04	0.205	-0.134	-0.209	-0.281	-0.247	0.07	-0.335	-0.296	0.012	0.075	0.028	-0.112	1.829	0.549	-0.389	0.589	-0.223	0.231	0.178	-0.445	0.073	0.077	0.163	0.839
HMDB60287	4-hydroperoxy-2-nonenal	C9H16O3		0.5225	0.3685	0.8325	0.1495	0.5305	0.5015	0.1965	-0.1915	0.3385	0.7835	0.1575	-0.0345	0.2475	-0.0575	-0.2375	-0.1105	0.0035	-0.1235	-0.4605	-0.4955	-0.3915	-0.2535	-0.3235	-0.5085	-0.1015	-0.3755	0.0405	-0.2495	0.3075	0.2405	-0.3265	-0.3125	-0.2895	0.1715	0.1115	-0.3935	-0.2325	-0.0745	-0.3105	-0.3585
HMDB02203	w-hydroxydecanoicacid	C10H20O3		0.2495	0.2625	0.3715	0.1365	0.2595	0.2275	-0.0615	-0.0385	0.0215	0.4145	0.0485	-0.0025	0.0185	0.2225	-0.0645	0.0285	0.1775	-0.1915	0.1405	-0.5485	-0.5105	-0.2765	-0.4265	-0.4515	-0.1925	-0.0875	0.1155	-0.1095	0.4935	-0.0005	-0.4095	-0.0835	0.1205	0.0005	0.0175	-0.3845	-0.0755	-0.0855	-0.3425	-0.1835
HMDB00517	arginine	C6H14N4O2		-0.2465	-0.0275	-0.3045	-0.2465	-0.5235	-0.1425	0.0045	-0.0285	-0.2515	-0.2595	0.0575	0.1115	-0.2235	-0.1775	-0.0485	0.0275	-0.1515	0.0255	-0.1865	0.1705	0.2695	0.2335	-0.4175	-0.1385	-0.3715	-0.0305	-0.2315	0.1475	-0.0485	-0.1535	0.0985	-0.1635	-0.0215	-0.3735	-0.1505	0.0335	0.0045	-0.2375	-0.0045	0.1085
HMDB01000	dUDP	C9H14N2O11P2		-0.384	-0.387	-0.031	-0.139	-1.472	0.039	-0.834	-0.044	-1.127	-0.72	0.334	-0.041	-0.005	0.165	0.388	0.004	-0.303	0	0.23	0.203	0.058	-0.037	0.153	0.238	0.187	-0.092	0	-0.153	-0.001	-0.271	-0.34	0.252	-0.016	-0.198	-0.138	-0.302	-0.084	-0.249	-0.165	0.453
HMDB00807	D-Glycerate 3-phosphate/D-Glycerate 2-phosphate	C3H7O7P		0.165	-0.282	0.171	-0.348	-0.327	-0.293	-0.447	0.184	-0.325	-0.668	0.526	0.163	0.102	0.014	0.145	0.221	-0.123	-0.131	-0.312	0.081	0.005	0.128	0.03	0.138	0.081	0.09	-0.073	0.125	-0.244	0.378	-0.218	0.12	0.312	-0.239	-0.295	-0.31	0.165	-0.392	-0.198	0.25
HMDB01316	6-Phosphogluconic acid	C6H13O10P		-0.0045	-0.3865	0.3235	-0.1445	-0.1805	-0.3345	-0.4565	-0.0575	-0.5145	-0.3775	1.2285	0.1245	0.2195	0.1755	-0.0675	-0.1215	-0.4235	-0.1565	-0.1415	0.2275	0.2725	0.2535	-0.1065	0.2215	-0.1445	0.7775	-0.1525	-0.0705	-0.4665	-0.4075	0.1765	0.0045	-0.0325	-0.1925	-0.4975	-0.3645	-0.0735	-0.1025	-0.0645	0.8895
HMDB00902	NAD+	C21H27N7O14P2		-0.29	0.059	-0.243	0.097	0.282	-0.023	-0.045	0.015	0.042	-0.191	-0.08	0.01	0.071	0.199	-0.108	-0.037	0.001	-0.104	-0.173	-0.147	-0.015	-0.054	-0.018	0.049	0.082	0.042	0.09	-0.63	-0.148	-0.259	-0.866	-0.398	-0.099	0.018	0.027	-0.15	0.034	0.009	0.067	-1.127
HMDB00285	UTP	C9H15N2O15P3		-0.799	-0.271	-0.381	0.068	-0.366	-0.298	-0.873	0.356	-0.416	-0.768	0.508	-0.271	0.313	0.607	-0.16	-0.244	-0.066	-0.091	0.133	0.116	0.351	0.323	-1.174	-0.907	-0.774	-0.535	0.206	-0.745	-0.788	-1.892	-0.777	0.095	0.076	0.052	0.012	-0.603	-0.3	-0.32	-0.228	-0.921
HMDB00538	ATP	C10H16N5O13P3		-0.804	-0.214	-0.448	0.017	-0.353	-0.263	-0.747	0.419	-0.386	-0.765	0.501	-0.149	0.299	0.505	0.069	-0.078	0.001	0.004	0.091	0.033	0.006	-0.001	-1.04	-0.938	-0.704	-0.201	0.319	-0.675	-0.772	-1.07	-0.547	0.294	0.21	0.142	0.04	-0.454	-0.026	-0.224	-0.107	-0.721
HMDB00082	CTP	C9H16N3O14P3		-0.4595	-0.3415	-0.1855	0.1015	-0.4805	-0.5445	-1.5205	0.4245	-0.8265	-0.5185	0.5095	-0.3275	0.3025	0.6205	-0.3255	-0.4645	0.0045	-0.5595	-0.0535	-0.3795	0.0025	-0.0085	-2.2715	-2.4365	-2.3665	-0.7235	0.1025	-1.1845	-1.4825	-1.6455	-2.1025	0.0655	-0.1395	0.1195	-0.0625	-2.2125	-0.4125	-0.4315	-1.0435	-2.1965
HMDB01273	GTP	C10H16N5O14P3		-0.3675	0.1555	0.0465	0.2735	0.2075	0.1385	-0.4855	0.4985	0.2905	-0.4485	0.3825	-0.1685	0.2985	0.5045	-0.0325	-0.0205	0.4725	0.2845	0.0985	-0.3005	-0.1685	-0.1315	-2.4325	-2.5975	-1.0825	-0.1235	0.5485	-0.1535	-0.7755	-0.8165	-0.4875	0.3355	0.2015	0.3715	0.3705	-0.2835	0.0525	-0.0995	-0.0155	-0.6095
HMDB06236	phenylacetaldehyde	C8H8O		-0.1025	0.1145	-0.0705	-0.0125	-0.0965	0.2655	0.1405	-0.0125	0.0585	-0.0375	0.0305	-0.0245	-0.2375	-0.0455	0.0365	0.0655	0.1335	0.0595	-0.0765	-0.1995	-0.1885	-0.2935	-0.0665	-0.1265	-0.0875	-0.0705	0.0045	0.1065	0.2645	0.0025	0.0475	-0.2675	0.0475	-0.0835	-0.0715	0.0625	0.0255	-0.1855	-0.0465	0.0705
HMDB01218	coumarin	C9H6O2		-0.167	0.077	-0.126	-0.063	-0.176	0.169	0.079	0.023	0.008	-0.113	0.028	-0.034	-0.243	-0.073	0.079	0.013	0.122	0.023	0.022	-0.11	-0.126	-0.142	-0.05	-0.084	-0.057	-0.066	-0.028	0.095	0.133	-0.023	-0.017	-0.217	0.041	-0.047	-0.105	0.053	0.026	-0.164	-0.068	0.023
HMDB01870	benzoate	C7H6O2		-0.1735	0.0945	-0.1325	-0.0485	-0.1705	0.1875	0.0725	0.0475	-0.0065	-0.1175	0.0375	-0.0065	-0.2075	-0.0555	0.1065	0.0345	0.1325	0.0275	0.0645	-0.0515	-0.0945	-0.0855	-0.0245	-0.0445	-0.0265	-0.0405	-0.0015	0.1155	0.1435	-0.0115	-0.0115	-0.1775	0.0725	-0.0265	-0.0735	0.0715	0.0595	-0.1335	-0.0505	0.0475
HMDB00491	3-methyl-2-oxopentanoate/4-methyl-2-oxopentanoate(ketoleucine)	C6H10O3		0.0875	0.0905	0.1185	0.1815	-0.0635	0.0775	0.1705	-0.2275	-0.1615	0.0855	-0.1965	-0.2755	0.0225	-0.2975	-0.6425	-0.3825	-0.0025	-0.6565	0.3485	-0.0175	-0.0455	-0.0645	0.1775	0.1415	0.1265	-0.3755	-0.3215	-0.5505	0.1725	-0.2445	-1.1385	-0.4655	-0.2615	-0.1625	0.2055	-0.7145	-0.5025	0.0025	-0.5375	-1.2415
HMDB00019	3-methyl-2-oxobutanoate	C5H8O3		0.1275	0.2585	0.1425	0.4125	0.0045	0.2595	0.2835	-0.2675	-0.0495	0.4735	0.0375	-0.1815	0.1665	-0.1305	-0.5725	-0.1725	-0.0315	-0.2615	0.1305	-0.1725	-0.1605	-0.3325	0.2575	0.2165	0.2875	-0.5195	-0.3595	-0.6055	0.5015	-0.2805	-0.7735	-0.3725	-0.4035	-0.0835	0.2065	-0.6045	-0.5195	0.0695	-0.4575	-0.8215
HMDB03501	trans-caffeate/3-(4-hydroxyphenyl)pyruvate	C9H8O4		-0.145	0.371	-0.186	0.8	-0.193	0.124	-0.015	-0.316	-0.016	0.291	-0.07	0.352	0.501	-0.251	-0.475	-0.254	-0.053	0.006	0.39	-0.333	-0.167	-0.474	-0.122	-0.268	-0.041	-0.5	-0.393	0.081	0.34	-0.441	-0.548	0.43	-0.551	-0.093	0.058	-0.593	-0.274	-0.006	-0.484	-0.416
HMDB03345	alpha-D-glucose	C6H12O6		0.37	0.317	0.281	0.238	0.229	0.406	0.272	-0.302	0.507	0.667	-0.338	-0.107	0.043	0.021	0.024	-0.144	0.136	-0.113	-0.981	-0.741	-0.62	-0.761	-0.734	-0.523	-0.701	-0.635	-0.268	-0.604	0.42	0.313	-0.972	-0.093	-0.845	0.194	0.386	-1.069	-0.674	0.231	-0.724	-0.192
HMDB06293	L-erythrulose	C4H8O4		0.3185	0.4125	0.3995	0.2795	0.3415	0.5055	0.3505	-0.3115	0.6275	0.6495	-0.3665	-0.0775	-0.0145	0.0145	0.0165	-0.1455	0.1885	-0.0465	-1.1125	-0.8915	-0.7525	-0.9115	-1.0685	-0.9115	-1.1315	-0.7165	-0.1925	-0.9055	0.3825	0.3895	-0.9425	-0.2545	-0.9015	0.2205	0.3995	-0.9495	-0.8295	0.2585	-0.7975	-0.1555
HMDB02266	2-methylglutaconic acid	C6H8O4		0.313	0.394	0.394	0.276	0.346	0.48	0.351	-0.32	0.607	0.616	-0.396	-0.069	0.001	0.02	-0.001	-0.16	0.191	-0.069	-1.406	-0.964	-0.805	-0.977	-1.393	-0.916	-1.361	-0.796	-0.246	-1.271	0.35	0.385	-1.285	-0.26	-1.191	0.217	0.397	-1.562	-1.084	0.26	-0.984	-0.181
HMDB00208	2-oxoglutarate(2-)	C5H6O5		0.561	0.426	0.227	0.277	-0.294	-0.008	0.24	-0.029	-0.038	0.195	-0.042	0.011	0.174	0.209	-0.867	-0.181	0.126	-0.068	-0.366	-0.078	0.008	-0.033	0.116	-0.213	-0.3	-0.512	0.103	-0.379	0.436	-0.225	-0.764	-0.176	-0.315	0.208	0.302	-0.532	-0.354	0.055	-0.395	-0.721
HMDB00243	pyruvate	C3H4O3		0.5725	0.7465	0.5305	0.0595	0.3345	0.2135	0.0435	0.1945	0.4405	0.6155	0.1895	-0.0725	-0.0865	-0.0035	-0.3075	0.0035	0.3915	-0.0055	-0.6255	-0.6785	-0.6335	-0.6355	-0.3245	-0.5885	-0.4505	-0.4505	0.1825	-0.4035	0.3785	-0.0285	-0.4645	-0.2585	-0.3895	0.1005	0.3895	-0.4755	-0.3785	-0.2215	-0.4415	-0.6275
HMDB00263	Phosphoenolpyruvate	C3H5O6P		0.4835	-0.0145	0.5665	-0.1155	-0.2085	-0.0355	-0.1425	0.1395	0.1695	-0.2315	0.4735	-0.1115	0.0695	-0.2005	0.0315	0.1665	0.2295	-0.0565	-0.3085	-0.4905	-0.4685	-0.3395	-0.0035	0.0065	0.0265	-0.2875	0.1105	0.1885	0.2645	0.7805	-0.4035	-0.0135	0.3015	-0.2605	0.0035	-0.4895	0.0785	-0.2825	-0.2875	0.3865
HMDB00641	L-glutamine	C5H10N2O3		-0.224	0.114	-0.317	-0.077	-0.092	0.06	0.144	-0.041	-0.013	-0.008	-0.007	0.121	-0.021	0.007	0.071	-0.039	0.036	-0.099	-0.473	-0.595	-0.51	-0.626	-0.692	-0.513	-0.58	-0.032	-0.01	-0.118	-0.034	0.016	-0.293	0.026	-0.128	0.056	0.034	-0.156	-0.114	0.099	-0.133	-0.094
HMDB02031	3-Ureidoisobutyrate/Glycylsarcosine	C5H10N2O3		-0.1965	0.1405	-0.2915	-0.0505	-0.0645	0.0865	0.1715	-0.0145	0.0145	0.0195	0.0195	0.1475	0.0055	0.0345	0.0975	-0.0125	0.0625	-0.0725	-0.4465	-0.5685	-0.4835	-0.5995	-0.6655	-0.4865	-0.5535	-0.0055	0.0165	-0.0915	-0.0075	0.0435	-0.2665	0.0525	-0.1015	0.0825	0.0605	-0.1295	-0.0875	0.1265	-0.1065	-0.0675
HMDB59629	(R)-mevalonate	C6H12O4		-0.0355	0.2355	-0.1825	-0.0305	0.0855	0.1745	0.3225	-0.1045	0.1615	0.1275	0.0055	0.1245	-0.0345	0.0265	-0.0065	0.0465	0.1325	0.0695	-0.7625	-0.8675	-0.8305	-1.0125	-0.7135	-0.6095	-0.6455	-0.1035	-0.0055	-0.1155	0.1555	0.1025	-0.2185	-0.0935	-0.2575	0.0275	0.0655	-0.1435	-0.1525	0.0595	-0.1235	-0.0575
HMDB00448	HMDB00448	adipic acid		0.8365	0.2915	0.9895	0.1695	0.3605	0.3125	0.2635	-0.1815	0.4155	0.5705	-0.0285	0.0785	-0.0085	-0.0765	-0.2745	0.0075	-0.0355	-0.1875	-0.6485	-0.5645	-0.7335	-0.5815	-0.3765	-0.2565	-0.3325	-0.3575	-0.0075	-0.2605	0.4375	0.0925	-0.3835	-0.2535	-0.3205	0.1845	0.0615	-0.5825	-0.3665	-0.0775	-0.2395	0.2365
HMDB03357	N(2)-acetyl-L-ornithine	C7H14N2O3		0.261	0.186	0.291	0.328	0.47	0.017	0.019	-0.17	0.4	0.457	-0.247	-0.135	0.118	0.075	-0.45	-0.404	0.263	-0.141	0.03	-0.164	-0.479	-0.642	0.14	-0.006	0.233	-0.333	-0.474	-0.372	0.208	-0.216	-0.581	-0.13	-0.23	0.083	-0.004	-0.285	-0.462	0.12	-0.631	-0.17
HMDB42012	(-)-Salsolinol/NN-dimethyldopaminequinone-1	C10H13NO2		-0.163	0.001	-0.042	-0.001	0.003	0.126	0.064	-0.199	0.278	-0.096	-0.168	-0.329	-0.142	-0.169	-0.296	-0.138	-0.141	0.002	-0.454	-0.424	-0.373	-0.438	-0.33	-0.571	-0.432	-0.38	-0.025	-0.236	0.132	0.113	-0.166	-0.285	0.05	-0.177	0.008	-0.194	-0.16	-0.064	-0.344	-0.431
HMDB00187	L-serine	C3H7NO3		0.0925	0.0915	0.1275	-0.0505	-0.0485	-0.0155	0.2745	-0.0055	-0.0625	-0.0215	-0.2215	-0.0515	-0.0645	-0.1465	-0.1955	0.0545	0.0055	-0.1115	-0.0865	-0.1435	-0.1055	-0.1615	-0.2395	-0.2815	-0.2785	-0.1835	-0.0605	-0.0105	0.1135	0.1265	-0.0655	-0.2715	0.0455	-0.2055	-0.0435	-0.2105	0.0135	-0.0505	-0.1585	0.0115
HMDB02757	L-cysteate	C3H7NO5S		0.147	0.316	0.394	0.116	0.503	0.259	0.222	-0.088	0.836	0.254	-0.389	-0.187	-0.636	-0.269	0.124	-0.041	0.168	0.352	-0.07	-0.591	-0.529	-0.599	-0.188	-0.481	-0.664	-0.031	0.458	-0.253	0.474	0.788	0.25	0.209	0.152	0.025	0.252	0.065	0.136	-0.144	0.189	0.173
HMDB28691	L-Alanyl-L-leucine	C9H18N2O3		0.8605	0.2295	0.3265	0.3905	0.4085	0.2775	0.4965	0.1265	0.4925	1.0335	-0.1195	0.0205	0.2655	-0.0845	-0.0595	0.4755	0.3615	0.1685	-1.0035	-0.8465	-0.8815	-1.0835	-1.1595	-0.8755	-0.9295	0.4725	0.0265	-0.1785	0.1935	0.2025	-0.3655	-0.0205	-0.0585	0.1415	0.2165	0.0865	-0.2275	0.1105	-0.0955	-0.2355
HMDB00079	5,6-dihydrothymine	C5H8N2O2		0.1685	0.7735	0.2845	0.0365	0.2355	0.1565	0.3045	0.1035	0.6945	0.3295	0.4725	0.4825	-0.0945	-0.0815	0.0495	0.1895	0.2955	0.5385	-0.9055	-0.8865	-0.8145	-1.0115	-0.6955	-0.7225	-0.7645	0.0355	-0.1095	-0.0765	0.5415	0.3455	0.0285	0.4075	0.2575	0.7485	0.6505	-0.1285	0.0565	-0.0505	0.2495	-0.1455
HMDB60278	fructoseglycine	C8H15NO7		-0.781	0.3	-0.716	0.281	-0.333	0.422	0.143	-0.285	-0.121	0.031	-0.029	0.444	0.078	-0.143	0.217	-0.023	0.177	-0.553	-1.978	-1.155	-0.848	-1.096	-3.385	-1.677	-2.426	-0.706	-0.39	-2.256	0.125	0.142	-3.216	-0.569	-2.066	-0.027	0.141	-2.085	-1.876	-0.279	-1.645	-0.218
HMDB01511	N-phosphocreatinate	C4H10N3O5P		0.424	0.446	0.388	0.174	0.595	-0.072	-0.025	0.175	0.348	-0.051	0.172	-0.05	0.029	0.106	-0.354	0.102	0.261	-0.104	-0.504	-0.591	0.107	0.205	0.282	0.231	0.462	-1.066	-0.042	-1.555	-0.068	-0.049	-1.389	-0.397	-0.64	0.106	0.137	-0.92	-0.609	-0.142	-0.983	-0.967
HMDB00854	N-Formimidoyl-L-glutamate	C6H10N2O4		0.6	-0.089	0.201	-0.258	-0.607	-0.147	0.282	0.186	-0.302	0.583	0.034	0.883	0.411	-0.006	0.022	0.02	-0.094	0.262	0.231	0.459	0.436	0.383	-0.354	-0.337	-0.294	0.22	-0.369	-0.212	0.258	-0.366	-0.095	-0.485	-0.152	-0.493	-0.144	-0.079	-0.131	-0.269	-0.15	-0.275
HMDB00653	cholesterol sulfate	C27H46O4S		-1.274	0.377	-1.191	1.66	1.015	0.187	-0.074	0.51	0.192	0.093	0.548	0.408	0.534	0.448	0.185	-0.804	0.831	-0.046	0.482	-0.318	-0.575	0.463	-0.371	-0.225	-0.551	-0.199	0.474	0.736	0.846	0.76	0.058	-0.117	-0.035	0.823	0.429	-0.968	-2.112	1.81	0.141	1.055
HMDB03337	GSSG	C20H32N6O12S2		-0.775	0.012	-0.481	-0.071	0.08	-0.218	-0.204	0.107	-0.209	-0.551	-0.111	0.11	-0.225	-0.07	-0.015	0.023	0.091	-0.207	-0.088	-0.287	-0.144	-0.148	-0.12	-0.117	0.239	-0.495	0.279	-0.098	-0.401	-0.205	-0.377	0.309	0.121	0.056	0.088	-0.288	0.192	-0.022	0.024	-0.811
HMDB06248	gama-L-glutamyl-L-alanine/5-L-Glutamyl-L-alanine-1	C8H14N2O5		-1.146	-0.835	-2.551	-0.522	-2.528	-0.648	-0.418	-0.01	-1.515	-0.451	0.467	0.298	-0.088	0.122	0.287	0.284	-0.653	0.542	-0.165	0.076	0.064	-0.207	-0.664	-0.399	-0.338	-0.5	-0.506	0.215	-1.144	-1.049	0.058	-0.057	0.044	-0.865	-0.648	0.004	0.373	-0.332	-0.075	-0.244
HMDB00254	succinate(2-)	C4H6O4		-0.233	-0.2	-0.386	-0.217	-0.451	-0.179	-0.032	0.16	-0.266	-0.367	-0.071	0.096	-0.065	0.075	0.056	-0.006	-0.051	-0.103	0.232	0.352	0.357	0.302	0.089	0.091	-0.007	0.087	0.094	0.025	-0.304	-0.232	-0.001	-0.093	0.218	-0.093	0.001	0.226	0.163	0.01	0.069	-0.366
HMDB02005	Methionine sulfoxide	C5H11NO3S		0.026	0.027	0.365	-0.071	-0.329	0.281	0.218	-0.202	0.069	0.369	-0.255	-0.122	-0.269	-0.539	-0.392	-0.013	0.08	0.623	-0.102	-0.227	-0.12	-0.339	-0.056	-0.086	0.077	-0.409	0.356	-0.261	0.427	-0.092	-0.325	0.032	-0.112	-0.112	0.264	-0.45	0.147	0.101	-0.024	-0.299
HMDB00624	(R)-2-hydroxy-4-methylpentanoate	C6H12O3		0.0485	-0.0425	0.0295	-0.0435	-0.1275	0.3195	0.0935	-0.1475	-0.1295	0.2345	-0.2005	-0.0545	-0.1475	0.0405	-0.1085	-0.0625	-0.0055	-0.1105	0.0475	0.0595	-0.0485	-0.0725	0.2485	-0.0055	0.0975	-0.3325	0.1715	-0.0395	0.1975	-0.3585	0.0045	-0.3355	-0.1215	-0.1805	-0.1295	0.0475	-0.0765	-0.1135	-0.1205	0.0005
HMDB00500	4-hydroxybenzoate/Gentisate aldehyde	C7H6O3		-0.2165	-0.1265	0.5405	0.1515	0.1055	-0.0845	-0.1955	-0.4115	-0.1035	-0.0275	0.6515	0.0275	-0.3955	-0.6185	-0.5215	-0.6155	-0.0995	-0.5305	-0.5195	-0.6415	-0.5815	-0.5855	-0.7665	-0.7675	-0.4125	-0.2905	-0.5015	-0.6115	0.7335	0.7615	-0.5875	-0.1105	-0.5105	-0.2635	-0.1885	-0.6995	-0.4885	-0.3175	0.5565	-0.2465
HMDB00123	glycine	C2H5NO2		-0.2155	0.0475	-0.0675	0.0545	-0.1475	-0.0775	0.1285	0.1575	-0.1575	0.0785	0.0475	0.2985	0.0885	0.0435	0.0155	0.0855	0.0495	-0.2255	-0.1505	-0.0925	-0.0855	-0.1365	-0.2365	-0.2235	-0.2495	-0.1305	-0.0455	-0.1305	-0.0835	0.1155	-0.1285	-0.2115	0.0625	-0.1685	0.0585	-0.0165	-0.0275	-0.0745	-0.0985	0.0625
HMDB00244	Riboflavin	C17H20N4O6		0.429	-0.186	-0.219	-0.35	-0.354	-0.185	-0.146	-0.182	-0.02	0.352	-0.087	-0.545	-0.373	-0.244	-0.342	-0.166	-0.129	0.035	0.034	0.082	0.146	0.033	0.233	0.186	-0.005	-0.398	-0.075	0.188	-0.032	-0.462	0.015	-0.277	-0.089	-0.346	-0.293	0.502	0.093	-0.285	-0.019	0.093
HMDB01325	N6N6N6-Trimethyl-L-lysine	C9H20N2O2		0.125	-0.156	-0.214	-0.236	-0.426	-0.18	-0.043	0.056	-0.271	0.308	-0.089	-0.14	-0.24	-0.197	-0.131	-0.113	-0.24	0.189	0.05	0.161	0.067	0.071	0.099	0.161	0.194	0.204	-0.294	0.14	-0.099	-0.225	0.229	-0.031	0.034	-0.32	-0.029	0.136	-0.002	-0.286	0.18	0.061
METPA0491	N2-Formyl-N1-(5-phospho-D-ribosyl)glycinamide	C8H15N2O9P		-1.2895	-2.2295	-1.8235	-2.4335	-1.8005	-2.2695	-2.1095	-2.8955	-1.9215	-2.1445	-0.0485	-2.7635	-2.8095	-2.6705	-1.1695	-2.4655	-1.4895	-0.2575	1.5505	1.9975	1.9475	1.8135	-0.1325	-0.1975	-0.3285	-0.6845	-2.5195	0.6835	-1.3595	0.2195	-0.3055	-1.0625	-0.9435	0.1675	-1.2225	-0.1765	-1.6745	-1.3975	-1.3075	0.3085
HMDB00965	Hypotaurine	C2H7NO2S		-0.545	-0.294	-1.688	-0.291	0.096	-0.374	-0.502	-0.383	-0.363	-0.34	-0.146	-0.389	-0.284	-0.022	-0.205	-0.435	-0.505	-2.733	0.357	0.557	0.528	0.575	0.232	0.183	0.279	0.265	-1.909	-0.228	-2.31	-0.691	0.091	-1.856	-0.526	-0.368	-2.103	-0.231	-1.166	-2.016	-0.835	-0.033
HMDB01545	Pyridoxal	C8H9NO3		0.326	-0.188	0.144	-0.001	-0.125	-0.421	-0.304	-0.593	-0.346	-0.07	-1.062	-0.989	-0.276	-1.241	-1.012	-0.902	0.273	-0.911	-0.201	0.114	0.138	0.058	0	0.23	0.264	-1.552	-0.321	-0.453	-2.211	-0.552	-1.004	-1.105	-1.166	-0.741	-0.761	-1.296	-1.008	-0.377	-1.162	-0.51
HMDB00191	aspartate	C4H7NO4		-0.432	-0.141	-0.286	-0.205	-0.117	-0.187	-0.234	-0.184	-0.315	-0.474	-0.133	-0.118	-0.28	-0.154	-0.062	-0.063	-0.253	-0.114	-0.566	-0.489	-0.217	-0.214	-0.316	-0.261	-0.304	0.008	-0.026	-0.367	-0.396	-0.029	-0.05	0.177	-0.128	-0.215	-0.228	-0.418	-0.232	-0.016	-0.042	0.143
HMDB00068	Adrenaline/L-Normetanephrine	C9H13NO3		-0.3125	-0.2215	-0.2265	-0.3155	-0.2575	-0.3905	-0.2715	-0.8825	-0.3635	-0.0845	0.2995	-0.7865	-0.5255	-0.0155	-0.4225	-0.1655	-0.5595	-0.0775	0.4435	0.8105	0.9655	0.7405	-0.0115	0.2775	0.5225	-0.9595	-1.0315	-0.6865	-1.2735	-0.9495	-0.5955	-0.8905	-0.5655	-1.0995	-0.6075	-0.2975	-0.1205	-0.4285	-1.1075	-0.5915
HMDB00076	5,6-dihydrouracil/L-3-Cyanoalanine	C4H6N2O2		-0.0115	-0.3795	-0.0085	-0.4465	0.0105	-0.3145	-0.2735	-0.7025	-0.1155	-0.0045	-0.5765	-0.6695	-0.7345	-0.6295	-0.4215	-0.3815	-0.3965	0.0645	-0.1735	0.0225	0.0235	-0.2225	0.1345	0.2075	0.2075	-0.8045	-0.5345	-0.5055	-0.1945	-0.3775	0.0805	-0.5565	-0.4305	-0.5925	-0.4215	-0.1125	-0.1315	-0.5325	-0.6165	-0.7045
HMDB00267/ HMDB00267	5-oxoproline/L-1-Pyrroline-3-hydroxy-5-carboxylate			-0.2195	-0.2675	-0.4415	-0.4555	-1.0305	-0.3385	-0.0805	-0.2395	-0.7765	-0.1465	-0.4965	-0.3145	-0.3765	-0.5415	-0.2765	-0.3115	-0.3625	-0.5145	-0.7495	-0.6095	-0.5205	-0.5285	-0.6155	-0.5465	-0.5375	0.2275	-0.6915	-0.2095	0.0045	-0.2755	-0.1375	-0.2535	-0.3345	-0.6625	-0.5185	-0.1855	-0.4275	-0.4885	-0.1405	0.3995
HMDB01473	Dihydroxyacetone phosphate	C3H7O6P		0.095	-0.384	0.077	-0.074	-0.525	-0.385	-0.115	-0.092	-0.174	-0.698	0.025	-0.198	-0.019	-0.146	-0.422	0.027	-0.282	-0.111	-0.209	-0.058	-0.099	-0.072	-0.221	-0.163	-0.207	-0.434	-0.205	-0.039	-0.27	-0.495	-0.194	-0.098	-0.126	-0.372	-0.342	-0.409	0.161	-0.331	-0.102	-0.066
HMDB00159	L-phenylalanine	C9H11NO2		-0.4095	-0.1835	-0.4125	-0.3565	-0.5245	-0.1135	-0.2255	-0.1025	-0.2195	-0.3095	-0.1415	-0.2265	-0.3115	-0.2725	0.0035	-0.1625	-0.1655	-0.1195	0.1455	0.0115	0.0605	-0.0055	-0.1575	-0.1245	-0.1755	-0.1675	-0.1685	-0.0185	-0.2795	-0.2465	-0.0915	-0.1465	0.0525	-0.2555	-0.1965	-0.0335	-0.0035	-0.2525	-0.1745	-0.1035
HMDB00696	L-methionine	C5H11NO2S		-0.5145	-0.2585	-0.5275	-0.4495	-0.5245	-0.3285	-0.1635	-0.2925	-0.3345	-0.5245	-0.2115	-0.3225	-0.4235	-0.3525	-0.2295	-0.1845	-0.2595	-0.4185	0.0765	-0.0185	0.2255	0.0745	-0.0925	-0.1045	-0.1275	-0.2565	-0.2965	-0.0795	-0.4035	-0.3025	-0.1825	-0.4205	-0.1445	-0.4375	-0.3045	-0.1505	-0.1335	-0.4125	-0.2685	-0.1125
HMDB00172	L-isoleucine/L-leucine	C6H13NO2		-0.492	-0.334	-0.462	-0.358	-0.478	-0.238	-0.285	-0.134	-0.336	-0.31	-0.207	-0.2	-0.313	-0.246	-0.093	-0.195	-0.241	-0.203	0.131	0.034	0.038	0.007	-0.256	-0.205	-0.212	-0.173	-0.149	0	-0.315	-0.316	-0.117	-0.148	0.048	-0.265	-0.178	-0.023	-0.024	-0.195	-0.186	-0.181
HMDB00158	L-tyrosine	C9H11NO3		-0.366	-0.087	-0.324	-0.206	-0.35	0.003	-0.107	-0.043	-0.212	-0.319	-0.085	-0.14	-0.326	-0.203	-0.001	-0.136	-0.026	-0.141	0.024	-0.1	-0.113	-0.135	-0.162	-0.151	-0.156	-0.119	-0.114	0.005	-0.048	-0.145	-0.166	-0.246	0.016	-0.109	-0.184	-0.069	-0.052	-0.226	-0.182	-0.101
HMDB00828	N-Carbamoyl-L-aspartate	C5H8N2O5		-0.4265	-0.6095	-0.8675	-1.2605	-0.9965	-0.7795	-0.7795	-1.8095	-1.0795	-0.4335	-1.5645	-2.9695	-1.4015	-1.2545	-1.5135	-1.2475	-0.8595	-2.7005	-0.6755	-0.5865	-0.4825	-0.7775	0.1415	0.0515	0.0345	-1.1775	-1.0325	-1.2455	-0.6325	-1.2405	-0.3195	-0.8685	-1.1695	-1.2815	-1.0405	-0.5905	-0.8565	-1.0935	-2.9925	-1.6315
HMDB00167	L-threonine	C4H9NO3		-0.289	-0.088	-0.163	-0.12	-0.253	-0.107	0.171	-0.067	-0.125	-0.244	-0.211	-0.148	-0.107	-0.234	-0.11	0.072	-0.057	-0.167	-0.025	-0.231	-0.099	-0.19	-0.094	-0.117	-0.13	-0.097	-0.13	-0.09	-0.074	0.013	-0.206	-0.273	-0.101	-0.232	-0.048	-0.303	-0.031	-0.15	-0.174	-0.27
HMDB00883	Valine	C5H11NO2		-0.187	-0.01	-0.107	-0.053	-0.112	0.049	0.002	0.016	0.037	-0.05	-0.053	-0.069	-0.072	-0.093	0.02	-0.035	0.027	-0.024	0.034	-0.117	-0.147	-0.171	-0.138	-0.128	-0.151	0.042	0.014	0.028	0.013	-0.027	-0.046	-0.096	0.113	0.004	0.106	0.087	0.051	-0.017	-0.111	-0.075
HMDB60244	Phosphodimethylethanolamine	C4H12NO4P		-0.141	-0.067	-0.351	-0.349	-0.825	0.294	-0.603	-0.523	-2.11	-1.519	-0.306	-0.265	-0.341	-0.598	-0.397	-0.206	-0.654	-0.478	-0.455	0.033	0.007	-0.059	0.196	0.318	0.329	-0.251	-0.861	-0.573	-0.182	-1.246	-0.084	-0.564	-0.487	-0.721	-0.794	-0.263	-1.042	-0.633	-0.067	-0.208
HMDB00299	xanthosine	C10H12N4O6		-0.4375	-0.8885	0.5865	-1.7095	-0.2965	-1.0855	-1.2225	-1.0345	0.7845	-0.0185	-0.3635	-1.5325	-1.7445	-1.5345	-0.8115	-0.6475	-1.1215	-0.1165	-0.6865	-0.3425	-0.1285	0.0045	0.0525	-0.4465	-0.1515	-0.6645	-0.3785	0.8025	-1.6245	0.2915	-0.4865	-0.3245	-0.4095	-1.1205	-1.0185	0.5105	0.5055	-1.5725	-0.4875	-0.1275
HMDB06556	L-4-hydroxyglutamate semialdehyde	C5H9NO4		-0.545	-0.28	-0.534	-0.295	-0.449	-0.353	-0.238	-0.287	-0.593	-0.602	-0.217	-0.218	-0.314	-0.135	-0.191	-0.179	-0.35	-0.288	0	0.105	0.179	0.161	-0.138	-0.117	-0.218	-0.054	-0.059	-0.028	-0.433	-0.274	-0.002	0.156	0.124	-0.212	-0.134	0.091	0.077	-0.043	-0.123	-0.001
HMDB00148	L-glutamate	C5H9NO4		-0.5615	-0.2845	-0.5445	-0.3005	-0.4595	-0.3555	-0.2425	-0.2895	-0.6005	-0.6085	-0.2195	-0.2185	-0.3185	-0.1385	-0.1935	-0.1835	-0.3535	-0.2885	-0.0015	0.1005	0.1755	0.1575	-0.1415	-0.1205	-0.2195	-0.0585	-0.0645	-0.0305	-0.4345	-0.2815	-0.0055	0.1535	0.1225	-0.2155	-0.1365	0.0835	0.0745	-0.0455	-0.1275	-0.0025
HMDB00929	L-tryptophan	C11H12N2O2		-0.945	-0.008	-0.686	-0.236	-0.326	-0.046	-0.124	-0.023	-0.153	-0.645	-0.014	-0.122	-0.247	-0.109	-0.009	-0.076	0.002	-0.077	0.157	0.008	0.042	0.056	0.026	-0.001	-0.017	-0.067	-0.12	-0.18	-0.013	-0.257	-0.176	-0.219	0.037	-0.164	-0.034	0.007	-0.179	-0.131	-0.142	-0.195
HMDB01173	5-Methylthioadenosine	C11H15N5O3S		-0.7375	-0.7195	-0.8175	-0.8165	-0.5935	-0.6255	-0.2565	0.0885	-0.5975	-0.8985	-0.2825	-0.1745	-0.5695	-0.4165	-0.3185	-0.1505	-0.2785	0.0135	-0.3165	-0.0785	0.1965	0.0875	-0.1445	-0.1805	0.0505	-0.1355	-0.3985	-0.1915	-0.7405	-0.6285	-0.0675	-0.3705	-0.0275	-0.3705	-0.2995	-0.2155	0.1245	-0.5935	-0.1455	-0.7335
HMDB00182	lysine	C6H14N2O2		-0.4955	-0.0245	-0.5165	-0.1975	-0.4655	-0.1565	-0.0965	0.0355	-0.2415	-0.2405	0.0355	0.1535	-0.1615	-0.2075	-0.0245	-0.0415	-0.1095	-0.0275	0.3145	0.1965	0.3095	0.2235	0.0415	0.0825	0.1115	-0.0345	-0.2305	0.0825	-0.1465	-0.2485	0.0885	-0.1085	0.0165	-0.2995	-0.1195	0.0255	0.0165	-0.1695	-0.0345	0.0275
HMDB01896	5-methoxytryptophol	C11H13NO2		0.3205	-0.1725	0.3305	-0.1765	0.1765	-0.1845	-0.0205	0.0735	0.0005	-0.2835	0.4135	0.0235	-0.2155	-0.3635	-0.1515	0.0175	-0.2595	0.0575	-0.2975	-0.1985	-0.2205	-0.3225	-0.1795	-0.2635	-0.2805	-0.1705	-0.1785	0.2245	-1.6825	-0.3075	0.0755	-0.6215	-0.0555	-0.3145	-0.2925	0.0855	0.1175	-0.4545	-0.3135	-0.5065
HMDB01138	N-acetyl-L-glutamate	C7H11NO5		-0.0025	-0.2875	0.2435	-0.5045	-0.0195	-0.3725	-0.3085	-0.4825	-0.3145	-0.0695	-0.2535	-0.2625	-0.5445	-0.3495	-0.1535	-0.5415	-0.4315	0.1355	-0.2075	0.0545	0.0025	0.0055	0.2885	0.3065	0.1405	-0.2395	-0.1915	0.0285	-0.0575	-0.0945	0.1265	0.0665	-0.1025	-0.2965	0.1155	0.3995	-0.0715	-0.2715	-0.0055	-0.2315
HMDB60444	beta-D-Fructose 1,6-bisphosphate	C6H14O12P2		-0.3555	-0.7175	-0.2175	-0.6255	-0.4195	-0.6665	-0.8135	-0.4815	-0.8075	-0.7155	0.0395	-0.3475	-0.2425	-0.4195	-0.2645	-0.4205	-0.8035	-0.6875	-0.2065	0.2595	0.2205	0.3155	-0.2095	-0.0445	-0.1925	0.0705	-0.4665	0.1075	-0.5425	-0.4905	0.3875	0.2945	-0.1105	-0.2445	-0.5925	-0.0055	-0.1405	-0.4015	-0.1055	0.7445
HMDB60274	sedoheptulose 1,7-bisphosphate	C7H16O13P2		-0.7605	-2.1145	-0.4775	-1.2785	-1.6855	-2.1545	-1.9945	-1.1635	-1.8065	-1.4475	0.0255	-0.9615	-0.8335	-2.5555	-0.4705	-0.9115	-2.2295	-2.3795	-0.5555	-0.1365	-0.2395	-0.1025	-0.6365	-0.4085	-0.7345	0.0715	-0.9835	0.2315	-1.9565	-1.1625	0.8775	0.2275	-0.4215	-0.6595	-2.3575	0.1715	-0.6145	-1.1545	0.2495	1.0425
HMDB00125	glutathione	C10H17N3O6S		-0.6265	-1.3005	-0.3665	-0.4965	-0.4995	-1.4705	-0.4645	-0.3275	-0.5915	-1.3655	-0.0895	-0.0415	-0.1965	-0.0415	-0.6055	-0.2485	-1.4825	-1.7025	0.1365	0.3765	0.4065	0.3775	-0.0125	-0.0085	-0.7315	-0.1465	-1.3495	0.0605	-1.0675	-0.4915	-0.0065	-0.6795	-0.0605	-0.7825	-1.2295	0.1525	-0.4805	-0.4895	0.0225	-0.7125
HMDB00078	L-cysteinylglycine	C5H10N2O3S		-0.406	-1.585	-0.094	-0.249	-0.228	-2.784	-0.212	-0.257	-0.346	-1.521	0.052	0.098	-0.079	0.134	-0.517	-0.039	-2.859	-1.92	0.104	0.385	0.4	0.359	0.158	0.094	-0.627	-0.002	-1.537	0.213	-1.1	-0.279	0.239	-0.683	0.002	-0.739	-1.822	0.342	-0.343	-0.341	0.215	-0.54
HMDB01423	Coenzyme A	C21H36N7O16P3S		-1.376	-1.699	-1.293	-1.903	-1.27	-1.739	-1.579	-0.514	-1.391	-1.614	0.217	0.035	-0.466	0.145	-0.753	-0.61	-1.814	-1.964	0.095	0.551	0.589	0.494	0.598	0.615	-0.153	0.269	-1.989	0.056	-1.541	-1.704	0.765	-1.511	-0.276	-1.165	-1.942	0.591	-1.128	-0.873	0.433	0.068
HMDB00156	malate(2-)	C4H6O5		-0.22	-0.263	-0.124	-0.163	-0.181	-0.245	-0.154	-0.135	-0.229	-0.43	-0.346	-0.04	-0.043	-0.125	-0.224	-0.071	-0.225	-0.271	-0.072	0.084	0.177	0.176	-0.092	-0.008	-0.072	-0.075	-0.063	-0.069	-0.406	-0.077	-0.234	-0.092	0.04	-0.122	-0.171	-0.214	-0.078	-0.139	-0.08	-0.023
HMDB00134	fumarate	C4H4O4		-0.1385	-0.2025	-0.0435	-0.1035	-0.1115	-0.1795	-0.0755	-0.1295	-0.1605	-0.3825	-0.2785	0.0035	-0.0185	-0.0655	-0.1845	0.0045	-0.1785	-0.1395	-0.1695	0.0225	0.1165	0.1105	-0.0625	0.0015	-0.0635	-0.0455	-0.0215	-0.0315	-0.3165	-0.0125	-0.1395	-0.0625	0.0265	-0.1185	-0.1395	-0.1525	-0.0535	-0.1035	-0.0025	0.0635
HMDB01487	NADH	C21H29N7O14P2		-2.0725	-0.3295	-1.9895	0.1185	-0.1775	-0.1845	-0.1825	-0.0705	-0.4725	-0.4395	-0.1025	-0.1445	0.1875	0.1375	-0.1215	0.2505	-0.4905	-0.1025	0.1985	0.3385	0.3705	0.2925	0.0075	0.1395	0.0575	-0.0655	-0.1295	-0.0155	-0.6345	-0.9205	-0.1965	0.0805	0.1075	-0.3055	-0.3725	0.3915	0.0545	0.2285	0.3625	-0.1555
HMDB00290	UDP-N-acetyl-alpha-D-glucosamine/UDP-N-acetyl-alpha-D-galactosamine	C17H27N3O17P2		-1.0475	-0.3785	-0.6705	-0.2775	-0.6615	-0.4675	-0.7025	-0.0185	-0.7505	-0.8475	0.0775	-0.0245	-0.0655	0.0925	-0.1335	-0.2225	-0.5015	-0.1515	0.0745	0.2075	0.3385	0.2865	0.0065	0.1355	0.1055	-0.1005	-0.2275	0.0645	-0.5815	-0.6325	0.1345	0.1025	-0.0195	-0.2795	-0.1685	-0.0575	-0.0475	-0.1145	0.1725	-0.1215
HMDB00052	N(omega)-(L-Arginino)succinate	C10H18N4O6		-0.006	-0.278	-0.029	-0.121	-0.339	-0.185	-0.053	-0.035	-0.266	-0.129	-0.24	0.163	-0.102	-0.091	-0.277	0.089	-0.18	0.007	-0.179	0.432	0.796	0.857	-0.129	0.011	-0.214	0.124	-0.209	0.23	-0.243	0.113	-0.045	-0.269	-0.003	-0.329	-0.142	-0.08	-0.191	-0.206	0.146	0.353
HMDB01409	dUMP	C9H13N2O8P		-0.4225	-0.6095	-0.4105	-0.6615	-0.0905	-0.2445	-0.4445	-0.4045	-1.4135	-1.6365	-0.7015	-0.0345	-0.4455	-0.0715	0.1225	0.0635	-0.3775	-0.8985	-0.1085	0.1805	0.3275	0.2925	1.2705	1.2685	1.1125	0.7485	-0.2165	0.0035	-0.4505	0.1415	0.9065	0.1425	0.0195	0.0485	-0.0515	0.5845	0.1335	-0.1465	0.6305	0.2545
HMDB60067	CMP-2-aminoethylphosphonate	C11H20N4O10P2		-0.261	-0.344	-0.588	-0.583	-0.311	-1.878	-0.012	-0.118	-0.588	-0.886	-0.05	0.107	-0.225	-0.162	-0.18	-0.095	-0.182	0.115	-0.178	-0.055	0.023	0.004	0.605	0.07	-0.101	0.432	-0.142	0.295	-0.386	-0.299	0.542	0.013	0.133	-0.004	-0.163	0.677	0.065	-0.26	0.322	0.011
HMDB60072	CMP-N-trimethyl-2-aminoethylphosphonate	C14H26N4O10P2		0.071	-0.369	-0.831	-0.575	-0.191	-0.879	-0.241	-0.282	-0.399	-0.855	-0.051	-0.13	-0.538	-0.413	-0.135	-0.139	-0.435	0.15	0.019	0.114	0.282	0.254	1.017	1.04	0.991	0.322	-0.017	0.36	-0.306	-0.295	0.497	-0.229	0.196	-0.206	-0.155	0.559	0.121	-0.519	0.199	-0.23
HMDB00132	Guanine	C5H5N5O		-0.157	-0.247	-0.125	-0.37	-0.056	-0.103	-0.083	-0.185	-0.224	-0.342	-0.022	-0.208	-0.303	-0.164	-0.142	0.088	-0.206	0.17	0.003	0.05	0.049	-0.079	0.589	0.434	0.542	-0.169	0.055	0.276	0.153	-0.234	0.303	-0.004	0.212	-0.217	-0.127	0.371	0.427	-0.283	0.154	-0.106
HMDB00574	L-cysteine	C3H7NO2S		-1.516	-1.839	-1.433	-2.043	-0.688	-1.879	-1.719	-0.22	0.095	-1.165	-0.53	0.123	-0.599	0.688	-0.347	-2.075	-1.954	-2.104	0.507	0.493	0.425	0.378	0.536	0.58	-2.565	0.891	-1.144	0.033	-0.351	0.32	1.294	0.056	0.624	-0.835	-1.084	1.024	-0.161	-0.774	0.441	1.283
HMDB00288	UMP	C9H13N2O9P		-0.2245	-0.0305	-0.0305	-0.1595	-0.0465	0.0185	0.0015	-0.1985	-0.4045	-0.3265	-0.0525	0.3815	0.1595	0.0405	-0.0085	0.0615	-0.4235	-0.2465	0.2415	0.5085	0.4765	0.2865	0.5005	0.7065	0.5055	0.5125	-0.1525	-0.1235	-0.1925	-0.2335	0.4895	0.0565	0.0535	0.0885	0.0725	0.4715	-0.0815	0.4315	0.5895	0.0835
HMDB00300	uracil	C4H4N2O2		0.0045	-0.5095	-0.1835	-0.6965	-0.1875	-0.4445	-0.3005	0.2905	-0.0145	-0.5535	0.4325	-0.0435	-0.5045	-0.1865	0.1855	-0.0885	-0.0895	0.4065	0.4995	0.6555	0.6355	0.5725	0.2905	0.1035	0.1785	0.0465	0.1865	0.6625	-0.2435	-0.0285	0.7535	0.3325	0.7165	-0.3665	0.0045	0.9495	0.5345	-0.0045	0.5365	0.7605
HMDB00099	Cystathionine	C7H14N2O4S		-1.9575	-2.2805	-1.8745	-2.4845	-1.4775	-2.0365	-2.1605	-0.1175	-0.8905	-0.8375	-1.4065	-2.8145	-2.8605	-1.5765	-3.0095	-2.5165	-0.9515	0.8605	-0.0425	0.5005	0.8775	0.7795	0.3635	0.2025	-0.1055	1.2385	0.0735	-0.0785	-0.2135	-0.0785	-0.1345	-1.4565	0.1645	-0.6135	-0.5455	-0.1005	0.5565	-1.3735	0.4285	-0.5365
HMDB00271	sarcosine	C3H7NO2		0.08	-0.412	0.069	-0.38	-0.201	-0.349	-0.221	-0.285	-0.213	0.034	-0.448	-0.254	-0.576	-0.318	-0.441	-0.382	-0.221	0.006	-0.057	0.266	0.349	0.211	-0.004	0.164	0.115	-0.187	-0.436	-0.51	-0.085	0.031	0.104	-0.519	-0.492	-0.371	-0.386	0.107	-0.397	-0.413	-0.358	-0.165
HMDB00162	L-proline	C5H9NO2		-0.3455	-0.1745	-0.4785	-0.3735	-0.4765	-0.1935	-0.1725	0.0005	-0.1545	-0.0775	-0.1335	-0.2335	-0.2305	-0.2455	-0.1565	-0.1695	-0.1595	-0.0935	0.1615	0.0815	0.1885	0.1605	0.0575	0.1315	0.0895	-0.1735	-0.2115	0.0595	-0.3265	-0.2745	-0.2075	-0.1665	0.0435	-0.2015	-0.0545	-0.1475	0.0445	-0.2155	-0.0075	-0.2825
HMDB12880	acetamidopropanal	C5H9NO2		-0.2885	-0.1155	-0.4275	-0.3135	-0.4185	-0.1325	-0.1115	0.0575	-0.0945	-0.0175	-0.0735	-0.1735	-0.1705	-0.1845	-0.0965	-0.1085	-0.0995	-0.0325	0.2255	0.1455	0.2525	0.2245	0.1215	0.1955	0.1535	-0.1095	-0.1475	0.1235	-0.2625	-0.2105	-0.1435	-0.1025	0.1075	-0.1375	0.0095	-0.0835	0.1085	-0.1515	0.0565	-0.2185
HMDB01565	choline phosphate	C5H14NO4P		-0.7525	-0.3055	-0.5835	-0.2085	-0.3965	-0.4955	-0.4715	0.0035	-0.8815	-0.7205	-0.0415	-0.0645	-0.0635	0.0415	0.0435	-0.1325	-0.3885	-0.5495	0.0885	0.2005	0.1855	0.1965	0.1475	0.2305	0.1695	0.1225	-0.2555	-0.1595	-0.4945	-0.5535	-0.0335	-0.0495	-0.1935	-0.1595	-0.3055	0.0305	-0.3035	-0.3315	0.0675	-0.1135
HMDB00190	lactate	C3H6O3		-0.454	-0.315	-0.389	-0.203	-0.602	-0.28	-0.154	0.046	-0.354	-0.335	0.006	0.015	-0.06	-0.074	0.115	-0.018	-0.123	-0.126	0.356	0.346	0.356	0.401	-0.032	0.081	0.034	-0.006	0.054	0.187	-0.507	-0.229	-0.038	0.112	0.343	-0.083	-0.075	0.021	0.256	-0.046	-0.035	-0.171
HMDB00292	Xanthine	C5H4N4O2		-0.2685	0.0235	0.1005	-0.3675	-0.6455	-0.0825	-0.0185	-0.4575	-0.2405	-0.6045	-0.2015	-0.6185	-0.3255	-0.6385	-0.2995	-0.0375	-0.2535	-0.0535	0.0925	0.2445	0.4475	0.5375	0.2795	0.2575	0.2495	-0.6625	-0.0875	0.4875	-0.2465	0.0105	-0.5455	-0.0565	-0.1915	-0.5175	-0.3995	0.5125	0.5315	-0.3865	-0.2705	-0.2835
HMDB00824	propionyl-carnitine	C10H19NO4		-0.037	-0.269	-0.023	-0.121	-0.092	-0.189	-0.179	-0.173	-0.06	-0.38	0.356	0.085	0.371	0.082	0.119	-0.389	-0.076	0.189	0.186	0.404	0.404	0.377	0.332	0.698	0.564	0.343	-0.145	-0.34	-0.388	0.083	0.429	-0.022	-0.116	-0.222	-0.021	0.069	-0.034	-0.248	0.149	0.619
HMDB00251	Taurine	C2H7NO3S		-0.478	-0.155	-0.609	-0.143	-0.155	-0.171	-0.156	-0.099	-0.318	-0.263	-0.086	0.002	-0.104	0.001	0.061	0.038	-0.107	-0.158	0.257	0.347	0.388	0.363	-0.012	0.104	0.069	-0.088	0.106	-0.094	-0.308	-0.081	-0.008	0.21	-0.025	0.024	-0.063	-0.217	0.073	-0.031	-0.164	0.027
HMDB02013	butyryl carnitine	C11H21NO4		-0.837	-0.435	-0.622	-0.263	-0.63	-0.472	-0.495	0.151	-0.67	-0.576	0.602	0.332	0.282	0.336	0.056	-0.309	-0.397	0.245	0.441	0.567	0.602	0.613	0.098	0.043	-0.107	0.542	-0.243	-0.083	-0.862	-0.451	0.044	-0.118	0.138	-0.095	-0.348	0.103	0.061	-0.088	0	0.076
HMDB00064	creatine	C4H9N3O2		0.0085	-0.1595	-0.0205	-0.1725	0.2265	-0.2305	0.1915	0.1775	0.0335	-0.2735	-0.1265	0.2745	0.0745	0.0975	0.0555	0.0595	0.0045	-0.1175	0.2085	0.3325	0.3165	0.3325	0.2665	0.3665	0.2895	0.0585	-0.1145	-0.1235	-0.2655	-0.0125	0.1755	-0.1645	0.0525	-0.0085	-0.1105	0.0235	-0.0245	-0.0925	-0.0465	-0.1795
HMDB00086	sn-Glycero-3-phosphocholine	C8H20NO6P		-0.4105	-0.2485	-0.3955	-0.0785	0.2685	-0.2995	-0.2265	0.1845	-0.0335	-0.6825	-0.0675	-0.4875	-0.3025	0.1445	-0.0905	-0.1185	-0.0815	-0.1955	0.3175	0.3745	0.4455	0.4265	0.0355	0.1465	0.0365	0.0035	-0.0205	0.0845	-0.2925	-0.0085	-0.3735	-0.1045	0.1545	-0.0545	0.0445	0.0495	0.1715	-0.2365	-0.0485	-0.2595
HMDB00012	Deoxyuridine	C9H12N2O5																				-0.3075	-0.3315	-0.2045	-0.2175	0.8015	0.7155	0.5895	-0.3685	-0.3165	-0.3865	0.0895	0.1065	-0.0315	-0.4325	-0.1935	-0.4705	-0.4595	0.2465	-0.2095	-0.3305	-0.0225	-0.3915
HMDB00262	thymine/imidazol-4-ylacetate	C5H6N2O2		-0.039	-0.211	0.284	-0.569	0.036	-0.295	-0.259	-0.779	-0.222	-0.017	-0.335	-0.156	-0.538	-0.684	-0.56	-0.58	-0.546	-0.754	-0.163	-0.233	-0.081	-0.132	0.09	-0.035	0.071	-0.736	-0.498	-0.479	-0.164	0.13	-0.211	-0.879	-0.545	-0.527	-0.467	-0.067	-0.531	-0.824	-0.485	-0.847
HMDB00273	Thymidine	C10H14N2O5		0.0255	-0.1085	0.7385	-0.4385	-0.4665	-0.0255	-0.7465	-0.9195	-0.5015	0.3055	0.1925	0.1685	-0.2835	-0.8435	-0.3165	-1.4025	-0.9995	-1.0845	-0.2075	-0.3655	0.0385	0.0375	0.5055	0.3265	0.4165	-1.0905	-0.4365	-1.0175	0.0465	0.4475	-0.2495	-0.8805	-0.7155	-0.7955	-0.7585	-0.8795	-1.1915	-0.9495	-0.3165	-2.3375
HMDB00812	N-acetyl-L-aspartate/2-Amino-3-oxoadipate	C6H9NO5		-0.2885	-0.3935	-0.3825	-0.3385	-0.3045	-0.1715	-0.3365	0.3195	-0.6265	-0.3395	-0.0635	-0.3335	-0.1195	-0.1035	0.7525	0.0195	-0.0675	0.6165	-0.2075	0.1605	0.0605	0.0415	0.5075	0.6755	0.5305	0.5335	-0.0695	-0.3925	-0.3345	0.1115	0.4465	0.4525	-0.1205	-0.3645	0.1995	0.6905	-0.3575	0.0875	0.6645	-0.1595
HMDB01241	2-aminomuconate	C6H7NO4		0.1095	-0.1155	0.0095	-0.2045	0.0135	-0.0095	-0.2255	0.2595	-0.2065	0.1545	-0.1555	-0.2825	-0.1785	-0.1355	0.6655	0.0725	0.0185	0.7215	-0.5385	-0.0865	-0.2055	-0.2825	0.4905	0.6045	0.4655	0.4495	-0.0615	-0.4615	0.0245	0.1735	0.4945	0.2815	-0.3195	-0.3625	0.2205	0.6845	-0.3925	0.0215	0.6555	0.1115
HMDB01185	S-adenosyl-L-methionine	C15H22N6O5S		-0.269	-0.155	0.265	-0.137	0.164	-0.088	-0.058	0.519	0.015	-0.336	0.707	0.512	0.141	0.424	0.211	0.26	0.096	0.623	-0.015	0.375	0.364	0.44	0.508	0.504	0.154	0.435	-0.381	0.228	-0.389	-0.528	0.492	-0.168	0.041	-0.459	-0.712	0.299	0.321	-0.574	0.247	-0.199
HMDB01031	2-deoxy-D-ribose 5-phosphate/2-Deoxy-D-ribose 1-phosphate	C5H11O7P		0.066	-0.911	0.452	0.988	0.086	-0.382	1.134	-0.102	-0.14	-1.873	-2.597	-0.078	-0.185	-0.395	-0.601	1.336	-0.235	-0.309	0.106	0.176	0.105	0.105	-0.034	0.011	0.092	-0.13	-0.009	0.099	-0.177	-0.368	-0.129	0.199	-0.164	-0.178	-0.313	0.07	-0.109	0.422	-0.154	-0.293
HMDB01548	ribose-phosphate	C5H11O8P		0.262	-0.359	0.169	-0.121	-0.207	-0.234	0.012	-0.092	-0.115	-0.302	0.005	0.078	0.132	-0.245	-0.183	0.234	-0.188	0.076	-0.095	-0.147	-0.225	-0.104	-0.19	-0.031	-0.222	0.45	0.04	0.527	0.063	0.117	0.267	0.387	0.181	-0.036	-0.234	-0.27	0.271	-0.007	-0.053	0.237
HMDB01321	D-Erythrose 4-phosphate	C4H9O7P		1.0335	-0.4215	1.0655	0.8325	0.0235	-0.2905	1.1925	-0.1255	0.0455	0.0865	0.1605	0.3155	1.3035	0.0155	-0.2565	1.2455	-0.1135	0.7255	-0.5605	-0.1315	-0.2745	-0.2575	-0.3485	-0.1005	-0.3995	0.2005	-0.0145	1.0225	-0.1745	-0.1215	-0.0735	-0.2545	-0.0195	-0.3185	-0.3125	-0.4435	-0.0265	0.7345	-0.4075	0.6995
METPA0585	Sedoheptulose 7-phosphate	C7H15O10P		0.1125	-0.3365	0.1975	-0.2115	-0.0995	-0.2205	-0.2875	0.1755	-0.1825	-0.6425	0.1385	0.1335	0.0015	0.2615	0.1905	0.0005	-0.0735	0.0315	-0.1435	0.1495	0.0925	0.0735	-0.0015	0.2485	0.0315	0.2225	0.0665	0.0855	0.0345	0.2045	0.0525	0.1245	0.1835	-0.0515	-0.1475	-0.0695	0.0655	-0.2385	-0.1105	0.5625
HMDB01401	G6P/F6P	C6H13O9P		0.036	-0.397	0.261	-0.173	-0.129	0.071	-0.031	0.115	-0.055	-0.511	0.281	0.016	0.169	0.172	0.128	-0.001	-0.073	0.155	-0.082	0.279	0.14	0.219	-0.088	0.152	-0.082	0.027	0.099	0.057	-0.41	-0.164	0.015	-0.066	0.199	-0.203	-0.213	-0.249	0.097	-0.273	-0.18	0.795
HMDB00230	N-acetylneuraminic acid	C11H19NO9		-0.126	0.065	-0.298	0.233	-0.013	0.117	-0.282	-0.184	-0.258	-0.035	-0.042	-0.216	0.145	0.014	-0.066	0.267	-0.131	0.012	-0.005	0.199	0.038	-0.07	-0.251	-0.403	-0.414	0.057	0.022	-0.002	0.133	-0.108	0.274	-0.062	-0.229	-0.415	-0.179	-0.182	0.052	0.347	0.155	0.161
HMDB00050	adenosine	C10H13N5O4		-0.06	0.411	0.313	0.621	0.698	0.675	0.62	-0.126	0.904	0.686	0.725	0.873	0.62	0.36	1.006	0.432	-0.133	0.475	0.696	0.12	-0.321	-0.415	0.07	0.198	0.173	-0.053	-0.094	-0.199	0.933	0.675	0.243	0.143	0.085	0.053	1.03	0.125	0.369	1.111	0.811	-0.349
HMDB60158	Tetracosatetraenoyl carnitine	C31H53NO4		-0.3545	-0.2885	-1.0635	-1.6735	-1.0405	-0.0895	-0.3785	0.3485	-1.1615	-0.3315	0.0115	0.1955	-0.3045	-0.0125	0.3175	0.2555	0.1695	0.6405	0.3265	0.2355	-0.1195	-0.1645	0.8735	1.0235	0.7785	-0.6285	0.7805	0.3675	-1.3115	0.0175	0.6155	0.2385	0.3845	0.1995	0.3945	0.7225	0.7895	0.0005	0.3175	0.0165
HMDB00089	cytidine	C9H13N3O5		-0.0755	-0.4255	-0.3015	0.0025	-0.1325	-0.0385	0.2625	0.0615	0.0745	-0.2445	0.1015	-0.0275	0.1875	0.0395	0.2205	0.3995	0.1545	0.0225	-0.1925	-0.0405	0.0525	0.0745	0.6135	0.6485	0.7355	0.3845	-0.0795	-0.5445	0.2805	0.0655	-0.8235	-0.2645	-0.1145	-0.0025	0.0425	0.0765	0.4045	-0.2675	0.2805	0.0835
HMDB00095	CMP	C9H14N3O8P		0.2895	0.0435	-0.0605	-0.1345	-0.0055	0.1285	0.1055	-0.2065	-0.1315	-0.0685	0.0475	0.1725	0.0375	-0.0585	0.1365	0.2775	-0.1725	-0.0205	-0.0535	0.0235	0.0515	-0.0725	0.5035	0.7085	0.6045	0.5765	-0.1135	0.1035	0.5315	0.3415	0.1265	0.0185	0.1185	0.1485	0.0575	0.0905	0.2435	0.3265	0.2535	0.1525
HMDB01265	L-Fucose 1-phosphate	C6H13O8P		0.1495	0.0565	-0.0815	-0.2555	0.0535	-0.2915	0.2585	0.1095	-0.0755	-0.6425	-0.0245	-0.4785	-0.3915	-0.0785	-0.2755	0.3675	-0.0115	-0.1235	0.4035	0.3535	0.0695	0.0945	0.3905	0.1695	0.3615	-0.0635	0.3405	0.7745	0.0505	-0.1445	0.9505	0.4685	0.5845	0.0385	-0.2555	0.4325	0.6305	0.0315	0.6315	0.1765
HMDB01397	GMP	C10H14N5O8P		-0.605	-0.104	-0.519	-0.271	0.111	0.029	-0.154	0.17	-0.242	-0.419	0.02	0.56	0.07	0.023	0.124	0.07	-0.342	-0.028	0.39	0.49	0.416	0.303	0.8	0.707	0.597	0.652	0.237	0.326	-0.14	0.003	0.821	0.292	0.153	0.175	0.173	0.834	0.135	0.479	0.746	0.244
HMDB00045	AMP	C10H14N5O7P		-0.496	0.057	-0.303	-0.098	0.004	-0.038	-0.021	0.023	-0.744	-0.312	0.012	0.414	0.011	-0.104	0.093	0.054	-0.354	-0.283	0.331	0.517	0.435	0.275	0.489	0.631	0.44	0.432	-0.004	-0.314	-0.552	-0.603	0.303	0.264	0.099	0.044	-0.037	0.472	0.067	0.318	0.425	-0.334
HMDB01413	CDPcholine	C14H26N4O11P2		-0.631	-1.155	-0.587	-0.508	-0.129	-0.349	-0.165	0.025	-0.099	-0.961	0.317	0.26	-0.166	0.073	0.153	0.093	-0.214	0.38	0.329	0.38	0.405	0.392	0.674	1.036	1.069	0.046	0.211	0.624	-0.363	-0.337	0.388	0.021	0.515	-0.053	0.149	0.563	0.515	-0.17	0.374	0.025
HMDB01043	arachidonic acid	C20H32O2		0.251	0.005	0.212	-0.002	0.244	0.459	0.128	-0.178	0.309	0.008	-0.425	0.208	0.115	-0.213	0.544	0.361	0.116	0.081	0.33	0.011	-0.09	-0.032	0.585	0.496	0.479	0.132	0.213	0.236	-0.089	0.347	0.418	0.356	0.103	0.079	-0.072	0.289	0.399	0.094	0.231	0.539
HMDB00133	guanosine	C10H13N5O5		0.1355	0.0355	-0.4245	0.2095	0.3075	0.1965	0.3575	0.3225	0.3585	-0.0355	0.2695	0.5765	0.5205	0.2595	0.5515	0.6025	0.2245	0.6245	-0.0675	-0.2045	-0.5185	-0.0455	-0.5475	-0.2455	-0.1105	0.7275	0.4675	1.0065	0.5545	0.7175	0.6915	0.8205	0.6195	0.3445	0.2745	0.4725	0.7255	0.4055	0.5675	0.7075
HMDB00157	Hypoxanthine	C5H4N4O		0.375	0.146	0.393	-0.252	-0.161	-0.173	0.324	0.313	-0.032	-0.331	0.345	0.31	0.091	0.004	0.324	0.362	0.182	0.349	-0.262	-0.001	0.128	0.386	-0.067	0.115	0.032	0.429	0.402	0.671	-0.024	0.362	0.582	0.616	0.679	-0.028	0.023	0.682	0.468	0.07	0.437	0.768
HMDB00195	inosine	C10H12N4O5		0.447	-0.134	0.177	0.139	0.212	0.096	0.435	0.151	0.22	-0.121	0.011	0.458	0.442	0.116	0.454	0.5	0.07	0.3	-0.061	-0.011	-0.334	0.076	-0.526	-0.3	-0.393	0.599	0.354	0.582	0.308	0.608	0.577	0.64	0.348	0.244	0.184	0.419	0.473	0.405	0.446	0.464
HMDB00296	uridine	C9H12N2O6		0.376	0.102	0.22	-0.069	0.063	-0.058	0.29	0.064	0.168	-0.294	0.124	0.121	0.279	0.044	0.204	0.223	0.091	0.074	-0.031	0.166	0.176	0.243	-0.18	-0.044	0.008	0.15	0.124	-0.004	0.215	0.523	0.131	0.202	0.158	0.035	0.004	0.213	0.121	0.105	0.232	0.45
HMDB00848	stearoylcarnitine	C25H49NO4		-0.0585	0.0365	-0.0145	0.0235	-0.2475	0.1185	-0.1675	0.6625	-0.1115	-0.1515	0.2865	0.0635	0.2535	0.3545	0.2495	0.1905	0.2295	0.5035	0.8905	0.5285	0.2105	0.2855	0.4195	0.2525	0.2675	0.4635	0.4725	0.4355	-0.4115	0.0145	0.2315	-0.0145	0.7045	0.3595	0.5985	0.3825	0.5925	0.3545	0.4285	-0.1015
HMDB13336	3-hydroxyhexadecanoylcarnitine	C23H45NO5		-0.148	0.042	-0.067	0.76	-0.042	0.409	0.036	0.521	0.021	0.172	0.36	0.186	0.659	0.481	0.425	0.242	0.279	0.484	0.377	0.287	-0.073	-0.037	0.169	-0.099	-0.091	0.309	0.536	0.54	-0.535	-0.024	0.475	0.448	0.651	0.262	0.283	0.397	0.484	1.281	0.396	0.512
HMDB06464	Elaidic carnitine/Vaccenyl carnitine	C25H47NO4		0.218	0.028	0.003	0.332	-0.047	0.206	-0.2	0.418	0.205	0.166	0.137	0.149	0.299	0.482	0.29	0.209	0.259	0.563	0.291	0.106	-0.143	-0.108	0.253	0.009	0.082	0.364	0.47	0.334	-0.403	0.164	0.19	0.056	0.422	0.614	0.466	0.163	0.18	0.501	0.251	-0.003
HMDB00222	L-palmitoylcarnitine	C23H45NO4		0.024	-0.141	-0.253	0.135	-0.331	-0.058	-0.329	0.454	-0.11	-0.105	0.066	-0.075	0.23	0.351	0.172	0.028	0.029	0.278	0.498	0.234	-0.033	0.039	0.174	-0.012	0.065	0.191	0.312	0.129	-0.678	-0.14	0.106	0.105	0.424	0.356	0.172	0.153	0.26	0.538	0.121	-0.183
HMDB06317	trans-Hexadec-2-enoyl carnitine	C23H43NO4		0.006	-0.096	-0.291	0.714	-0.037	0.046	-0.234	0.185	0.052	0.1	0.06	0.135	0.373	0.503	0.116	0.184	0.253	0.502	0.165	0.08	-0.169	-0.089	0.235	-0.039	0.051	0.318	0.299	0.28	-0.365	0.037	0.139	0.072	0.262	0.48	0.127	0.065	0.165	0.495	0.291	0.168
HMDB05066	tetradecanoyl carnitine(myristoyl carnitine)	C21H41NO4		-0.375	-0.233	-0.464	0.516	-0.265	-0.177	-0.403	0.442	-0.296	-0.246	0.101	-0.014	0.357	0.422	0.013	0.023	0.016	0.204	0.343	0.231	0.016	0.095	0.205	-0.023	0.05	0.177	0.094	0.057	-0.501	-0.242	0.005	-0.005	0.338	0.255	-0.124	0.034	0.199	1.022	0.122	-0.218
HMDB02250	lauroyl carnitine	C19H37NO4		-0.321	0.107	-0.198	0.863	-0.07	0.006	-0.21	0.425	-0.064	-0.124	0.132	0.155	0.547	0.531	-0.03	0.005	0.238	0.344	0.491	0.261	-0.049	0.094	0.29	-0.069	0.074	0.246	0.117	0.129	-0.299	-0.025	-0.064	0.084	0.393	0.202	0.051	-0.005	0.315	0.912	0.181	-0.326
HMDB00791	octanoyl carnitine/L-Octanoylcarnitine	C15H29NO4		0.176	0.408	-0.062	0.303	0.035	0.233	-0.021	0.177	0.231	0.333	0.272	0.13	0.307	0.544	-0.049	-0.085	0.251	0.378	0.116	0.14	-0.056	-0.007	0.237	-0.048	0.072	0.313	0.248	-0.047	-0.194	0.146	-0.183	-0.066	0.261	0.294	0.204	-0.145	0.347	0.105	-0.118	-0.31
HMDB06210	decanoyl carnitine	C17H33NO4		0.152	0.566	-0.026	0.623	0.031	0.352	0.046	0.258	0.282	0.406	0.197	0.172	0.353	0.506	0.008	-0.025	0.358	0.443	0.383	0.185	-0.17	-0.097	0.335	-0.002	0.127	0.281	0.2	0.005	0.058	0.171	-0.306	0.076	0.371	0.398	0.303	-0.149	0.416	0.355	-0.057	-0.493
HMDB06469	Linoleyl carnitine/Linoelaidyl carnitine	C25H45NO4		-0.0835	-0.1675	-0.0915	0.0415	-0.1135	0.0995	-0.2775	0.2115	0.1715	-0.3095	-0.1635	0.0135	0.0985	0.2635	0.0885	0.0975	0.1865	0.5155	0.4055	0.2335	-0.1735	-0.0935	0.2285	0.0025	0.0405	0.4565	0.4055	0.1935	-0.5975	0.0185	0.0685	-0.0025	0.1585	0.4635	0.1945	0.0805	0.1925	0.2025	-0.0645	-0.3125
HMDB06319	alpha-linolenyl carnitine/gamma-linolenyl carnitine	C25H43NO4		0.0575	0.0405	-0.0865	0.3945	0.1185	0.2105	-0.0125	0.3295	0.2365	-0.1455	-0.0835	0.1155	0.4165	0.4265	0.0435	0.2875	0.2395	0.6115	0.3015	0.2125	-0.1775	-0.0845	0.5215	0.1905	0.2405	0.2305	0.4755	0.1595	-0.4185	0.0985	0.0575	0.1715	0.0795	0.4695	0.2505	0.1315	0.2115	0.3425	0.2325	-0.1975
HMDB00054	bilirubin	C33H36N4O6		-0.9405	0.6705	-0.8275	0.7235	0.0035	0.9605	0.7825	1.0805	0.7625	0.4715	0.2035	0.3935	0.5585	0.5105	0.8005	0.7885	1.0965	0.7675	0.5275	-0.0975	-0.0325	-0.2635	-0.0035	0.1235	0.1465	0.4035	0.6545	0.4995	0.6765	0.4335	0.3305	0.5535	0.5605	0.9025	0.9045	0.5075	0.7085	0.8525	0.1675	0.3635
HMDB00201	O-acetylcarnitine	C9H17NO4		0.0835	0.1845	-0.0375	0.1585	0.1175	0.0035	0.0975	0.0725	-0.0665	0.0135	0.0965	0.1845	0.2035	0.1575	0.0365	0.0285	0.0135	-0.1215	0.2225	0.3195	0.2355	0.2225	-0.0765	-0.0595	-0.1725	0.0865	0.1635	-0.0625	-0.1245	0.1855	-0.0185	0.1065	0.1235	0.2095	0.1885	0.0775	0.1085	0.1795	0.0195	-0.0795
HMDB13127	3-Hydroxybutyrylcarnitine	C11H21NO5		0.03	0.065	0.333	0.402	0.436	-0.014	0.13	0.167	0.115	-0.109	0.116	0.576	0.69	0.486	0.014	0.042	0.143	0.241	-0.174	0.08	-0.067	-0.081	-0.187	-0.261	-0.479	0.05	0.508	0.431	-0.244	0.517	0.304	0.156	0.316	0.479	0.263	0.548	0.331	0.323	-0.021	0.316
HMDB00062	(R)-carnitine	C7H15NO3		0.0045	0.0955	-0.0635	0.1215	0.1345	0.0235	0.1555	-0.0565	0.0565	-0.1505	0.0535	0.0825	0.1395	0.1385	0.0585	-0.0195	0.0065	0.0635	0.2495	0.2635	0.2655	0.2395	-0.0925	-0.0005	-0.0485	0.0885	-0.0125	-0.0825	0.0005	0.0835	-0.0185	0.0135	0.1325	0.0855	0.1065	0.0515	0.1495	0.0925	0.0295	0.0375
HMDB00043	glycine betaine	C5H11NO2		0.003	0.003	0.07	0.013	-0.031	0.047	0.061	0.184	-0.021	0.11	-0.12	0.063	-0.091	-0.053	0.101	0.127	0.079	-0.165	0.339	0.314	0.25	0.195	0.176	0.202	0.128	-0.044	0.219	0.14	-0.136	0.1	0.155	0.254	0.2	0.217	0.143	0.132	0.182	0.079	-0.09	-0.025
HMDB06528	clupanodonic acid/docosa-4,7,10,13,16-pentaenoic acid	C22H34O2		0.6935	0.5065	0.5565	0.4325	0.7725	0.6055	0.1985	0.2415	0.7815	0.5435	-0.2605	0.0135	0.2255	-0.0715	0.5125	0.3235	0.6225	-0.0405	0.2845	0.0505	-0.0195	-0.0175	0.7855	0.5235	0.6475	0.4475	0.6375	0.6635	0.3495	0.8165	0.6745	0.4885	0.2235	0.6225	0.2465	0.6855	0.1045	0.1375	0.4025	0.6325
HMDB02925	8,11,14-Eicosatrienoic acid (DGLA)	C20H34O2		0.6125	0.4475	0.5875	0.1975	0.8385	0.5945	0.4045	0.1615	0.7815	0.4155	-0.1095	0.4265	0.2175	-0.0165	0.7845	0.5135	0.4915	0.1085	0.5865	0.3775	0.1565	0.2275	1.1365	0.6985	0.8455	0.4595	0.5495	0.8345	0.3455	0.8355	0.9125	0.4345	0.4595	0.4945	0.2695	0.6865	0.2465	0.2115	0.8405	0.8025
HMDB00673	linoleic acid/linoelaidic acid (all trans C18:2)/octadecadienoate (n-C18:2)	C18H32O2		0.505	0.734	0.808	0.662	1.207	0.852	0.113	0.619	1.017	0.431	-0.202	0.147	0.375	0.024	0.57	0.115	0.954	0.011	0.247	-0.175	-0.153	-0.194	0.25	0.092	0.105	0.509	0.862	0.717	0.558	1.019	0.239	0.523	0.172	1.075	0.587	0.239	-0.058	0.53	0.285	0.346
HMDB03229	palmitoleate	C16H30O2		0.7375	0.7005	0.5505	0.6155	1.2565	0.6945	0.1085	0.2655	0.9615	0.7685	-0.1705	-0.0115	0.2095	0.0155	0.4375	0.0575	0.6205	-0.0855	0.1015	-0.3995	-0.3995	-0.2145	0.1885	-0.0565	0.0565	0.1775	0.4815	0.4565	0.6885	0.7345	0.4125	0.2675	0.0635	0.8565	0.2945	0.1105	-0.2375	0.3435	0.3375	0.2155
HMDB00207	oleic acid/elaidate/trans-vaccenate	C18H34O2		0.6505	0.8815	0.9155	0.8345	1.3145	0.9565	0.2775	0.7165	1.0925	0.9145	0.0745	0.3435	0.5205	0.1705	0.7235	0.2395	1.0255	0.0795	0.2485	-0.2555	-0.2195	-0.0375	0.5785	0.1925	0.3505	0.7275	0.9925	0.8925	0.8335	1.2645	0.4355	0.5535	0.3965	1.3065	0.7545	0.3865	-0.0165	0.6625	0.5915	0.4475
HMDB00175	IMP	C10H13N4O8P		0.3225	-0.3665	0.2175	0.0605	-0.0505	-0.1285	0.4115	0.4725	0.1525	-0.4955	0.0275	0.1395	0.0815	0.2785	0.0125	0.4065	0.1235	-0.3125	-0.0495	0.4575	0.0405	0.0335	-0.1275	-0.0125	-0.0285	0.2305	0.5015	-0.2495	-0.1905	-0.3475	0.5625	0.7695	0.1375	-0.1025	0.0925	0.0655	0.1925	0.3585	0.4435	0.3305
HMDB01564	CDP-ethanolamine	C11H20N4O11P2		-0.643	-0.081	-0.62	0.006	0.238	-0.042	0.128	0.116	0.019	-0.216	0.084	0.2	0.064	0.135	0.031	0.145	-0.006	0.214	0.206	0.208	0.186	0.185	0.367	0.455	0.491	-0.061	0.157	0.352	0.013	-0.075	0.178	0.172	0.32	0.098	0.087	0.291	0.263	-0.029	0.411	0.023
HMDB00925	Trimethylamine N-oxide	C3H9NO		1.675	0.477	0.871	0.064	0.741	0.607	0.815	-0.021	0.826	1.847	-0.053	0.606	-0.387	0.489	0.136	0.54	0.547	0.38	0.501	0.452	0.204	0.059	0.09	0.055	0.111	-0.232	0.04	-0.382	0.604	0.311	-0.097	0.518	-0.139	0.756	1.002	0.112	-0.086	0.11	-0.137	0.061
HMDB00092	NN-dimethylglycine	C4H9NO2		0.7885	0.2815	0.3785	0.2255	0.3845	0.4385	0.4135	-0.2075	0.4625	0.9985	-0.2565	0.0605	-0.0515	-0.0485	0.1005	0.1825	0.2085	0.0715	0.2475	0.1245	0.0175	-0.1195	0.1475	0.1465	0.1125	-0.0755	0.1195	-0.0615	0.3105	0.1895	0.0035	-0.2105	-0.1055	0.0955	0.1725	0.1165	-0.1245	0.0205	-0.2855	-0.2505
HMDB13076	spermidine dialdehyde-2	C7H13NO2		1.368	1.259	0.248	0.316	1.198	0.551	0.437	0.848	1.487	1.469	0.968	-0.005	0.146	1.117	0.347	0.184	1.046	1.194	0.23	0.169	0.075	-0.133	-0.066	-0.093	-0.084	-0.051	0.172	-0.02	1.014	-0.112	0.649	0.841	0.983	0.875	0.613	-0.343	-0.132	0.702	0.005	0.631
HMDB04586	Perillic acid	C10H14O2		0.15	0.171	0.607	0.635	0.761	0.481	0.345	0.355	0.582	0.207	-0.415	0.455	0.504	0.509	0.178	0.091	0.698	0.318	-0.012	-0.335	-0.539	-0.445	-0.294	0.018	-0.093	0.048	0.19	-0.111	0.205	0.336	-0.068	0.231	0.137	0.508	0.292	-0.492	0.318	0.484	-0.537	0.007
HMDB02183	docosahexaenoate(DHA)	C22H32O2		0.2845	0.1445	0.1705	0.4355	0.4465	0.3275	-0.1535	0.0125	0.4475	0.1795	-0.4125	-0.1675	0.2205	-0.1235	0.3895	-0.0105	0.3315	-0.1395	0.4825	0.0395	0.0005	0.0425	0.5895	0.4035	0.4145	-0.1285	0.2085	0.1215	0.2595	0.4125	0.1765	0.0375	-0.2535	0.3165	-0.0015	0.5795	0.0815	-0.0215	-0.1845	0.3355
HMDB00630	cytosine	C4H5N3O		0.3265	0.1755	0.3865	-0.0015	0.1545	0.2555	0.2085	-0.2435	-0.0195	0.4335	0.3435	0.3115	0.0015	-0.0645	0.1615	0.0905	-0.0445	0.0315	0.1035	-0.1165	0.2415	-0.0035	0.6795	0.4625	0.7545	0.4875	-0.0665	-0.5195	0.5335	0.0295	-0.2855	-0.1635	0.1365	-0.1845	-0.0805	0.3995	0.4295	-0.4165	0.2975	-0.2045
HMDB00014	2-deoxycytidine	C9H13N3O4		0.245	-0.024	0.502	-0.078	0.045	0.26	0.43	-0.336	-0.111	0.54	0.388	0.367	-0.025	-0.142	0.149	0.203	-0.082	0.176	-0.17	-0.438	-0.012	-0.272	0.689	0.419	0.749	0.544	0.016	-0.821	0.174	-0.012	-0.402	-0.323	0.142	-0.311	-0.151	0.556	0.511	-0.699	0.443	-0.125
HMDB00030	Biotin	C10H16N2O3S		-0.1455	-0.2585	-0.4785	0.0245	-0.0885	0.0065	0.4305	-0.0685	0.2165	-0.1715	0.1055	-0.0065	0.1365	0.1065	0.2055	0.5235	0.2055	0.2335	-0.2125	-0.0605	0.0225	-0.0865	0.5615	0.5665	0.6645	0.2525	-0.1115	-0.6135	0.2675	0.0435	-0.6305	-0.3335	-0.0585	-0.1175	0.0965	0.1275	0.5145	-0.3295	0.2435	0.0735
HMDB00161	L-alanine	C3H7NO2		-0.0295	0.0085	-0.1025	-0.1365	0.0595	-0.0165	0.1675	0.0265	0.1045	-0.0015	-0.1535	0.0125	-0.0815	-0.0515	-0.0845	0.0225	0.0485	-0.0565	-0.0325	0.0005	0.0935	0.0365	0.0745	0.0645	0.0365	-0.0785	-0.0675	-0.1245	-0.0345	-0.0405	0.0005	-0.2135	0.0635	-0.0815	-0.0305	-0.0155	0.1175	-0.1355	-0.0885	-0.1945
HMDB00126	Glycerol 3-phosphate	C3H9O6P		0.0465	-0.2625	0.0585	-0.0235	0.2335	-0.2975	0.0245	0.2735	0.0815	-0.5625	-0.2155	-0.1825	0.0785	0.2455	-0.0545	-0.1035	-0.0025	-0.2085	0.0545	0.1275	0.1165	0.1175	-0.1185	-0.3695	-0.2555	-0.0765	0.2165	0.0565	-0.0185	0.2695	-0.0595	-0.0705	0.0135	0.0025	-0.1485	0.4665	0.1625	-0.0485	0.1545	-0.0225
HMDB03290	gulonate	C6H12O7		0.477	0.076	0.455	-0.175	-0.099	0.088	0.09	-0.243	-0.124	0.448	0.073	-0.018	-0.161	-0.121	-0.021	-0.164	-0.189	-0.046	0.498	0.774	0.82	0.757	0.301	0.177	0.027	0.535	0.045	0.112	-0.128	0.177	-0.159	0.047	-0.006	0.093	0.02	0.346	-0.003	-0.005	-0.132	0.052
HMDB02366	tiglyl carnitine	C12H21NO4		0.3785	0.0145	0.1885	0.0195	0.0525	0.0795	-0.1195	0.1455	0.4435	0.1815	0.1735	-0.1275	1.1135	0.3785	0.0135	-0.3205	0.1405	1.4195	0.2155	0.4785	0.2715	0.2415	-0.0755	0.1515	0.0445	-0.2855	0.1095	0.1545	-0.1885	0.1595	0.4845	0.3075	-0.0185	0.0345	0.2325	0.3025	0.2715	0.0925	-0.0505	0.6755
HMDB00939	S-Adenosyl-L-homocysteine	C14H20N6O5S		0.0215	0.1025	-0.2325	-0.1435	0.3305	-0.0375	0.1255	-0.0905	0.4895	0.0665	-0.1485	0.3735	-0.1465	-0.0165	0.1925	0.1455	0.3195	0.2395	-0.4815	-0.2575	-0.1265	-0.0975	0.0045	0.0585	0.0205	0.2295	0.1205	0.2935	0.2445	0.6525	0.4295	0.1155	0.1705	0.2475	0.0735	0.1125	0.2265	0.0045	0.3515	0.4915
HMDB00425	3-Deoxy-D-glycero-D-galacto-2-nonulosonic acid	C9H16O9		0.2385	0.1935	0.2405	0.0955	0.3375	0.0535	0.1505	0.0595	0.2215	0.2155	0.4125	0.1085	0.2295	0.6535	0.6045	0.7235	0.0275	0.2905	-0.3285	-0.1375	-0.1265	-0.1415	-0.0215	-0.0975	-0.1155	0.1445	0.0265	0.0045	0.1655	0.0335	0.1865	0.0955	-0.1895	-0.1265	0.0705	0.1875	0.2745	0.1945	0.1675	0.3955
HMDB01014	4-Imidazolone-5-propanoate	C6H8N2O3		0.751	0.411	1.075	0.158	0.075	-0.035	0.044	-0.402	0.397	0.406	0.883	0.138	-0.072	-0.1	0.004	0.024	0.18	0.736	-0.298	-0.089	0.22	0.102	0.559	0.563	0.561	0.239	-1.062	-0.07	0.208	-0.076	0.649	-0.24	-0.125	-0.174	0.168	-0.271	-0.217	-0.095	-0.136	-0.397
HMDB00742	L-homocysteine	C4H9NO2S		-0.152	0.218	0.042	0.408	0.252	0.251	0.398	-0.182	0.225	0.327	0.25	0.299	0.213	0.239	-0.058	0.262	0.083	0								0.145	-0.06	-0.197	0.257	0.047	0.407	-0.011	0.054	0.262	0.148	0.162	-0.149	-0.179	-0.117	0.098
HMDB00895	acetylcholine/4-(trimethylammonio)butanoate	C7H15NO2		0.432	0.074	0.151	0.011	-0.001	0.038	0.237	0.222	0.095	0.25	0.071	0.231	0.117	0.116	0.126	0.234	0.073	0.282	0.269	0.282	0.09	0.136	-0.08	-0.156	-0.136	0.164	0.3	0.239	0.004	0.063	0.219	0.436	0.253	0.321	0.211	0.211	0.319	0.126	0.006	0.241
HMDB00562	creatinine	C4H7N3O		0.6265	0.5725	-0.1305	0.4215	0.4145	0.5095	0.5695	0.4405	0.5605	0.9365	0.2965	0.3135	0.4035	0.4335	0.4805	0.4535	0.5445	0.3605	-0.2075	-0.0635	-0.0265	-0.1155	-0.1745	-0.1375	-0.2095	0.3225	0.4845	0.3185	0.3175	0.4125	0.2305	0.5395	0.5715	0.5495	0.7185	0.3095	0.5105	0.4125	0.3225	0.2345
HMDB06348	pseudoecgonine/ecgonine	C9H15NO3		0.4325	0.7975	0.2935	0.5155	0.7825	0.5585	0.9205	0.5975	0.5775	0.3005	0.8185	0.6585	0.5985	0.8145	0.5345	0.6345	0.6305	0.6235	-0.8135	-0.6305	-0.0935	-0.1505	-0.5285	-0.4585	-0.7875	0.7785	0.6695	0.5295	0.5395	0.5725	0.4805	0.5475	0.5325	0.4755	0.6395	0.7295	0.6345	0.8255	0.7285	0.6395
HMDB41876	N1,N12-diacetylspermidine	C11H23N3O2		0.026	-0.293	-0.546	-0.36	-0.197	-0.173	0.028	-0.054	-0.054	0.194	-0.771	-0.217	-0.205	-0.035	-0.075	-0.047	-0.101	-0.04	-0.003	0.353	0.476	0.464	0.537	0.919	0.993	0.055	0.079	0.396	0.269	0.124	0.059	-0.174	0.391	-0.203	-0.191	0.562	0.371	0.608	0.542	-0.334
HMDB01123	anthranilate	C7H7NO2		-0.128	-0.036	-0.1	0.039	-0.13	-0.066	-0.086	0.019	-0.222	-0.154	-0.051	-0.129	0.084	0.127	0.066	0.07	-0.094	0.158	-0.185	-0.323	-0.117	-0.17	-0.271	-0.236	-0.092	-0.198	0.057	0.029	0.142	-0.053	-0.072	-0.022	0.072	-0.077	0.051	-0.071	0.177	0.045	0.017	0.055
HMDB03976	D-Glucuronate 1-phosphate	C6H11O10P		0.1185	-0.4335	0.0945	-0.1695	-0.0545	-0.0405	-0.1505	0.4275	0.2965	-0.5085	-0.0445	-0.0255	0.1685	0.1575	0.1455	0.3155	0.0275	0.0965	-0.3495	-0.2595	0.1275	0.1475	0.0685	0.0415	0.1385	0.1835	-0.0885	0.0135	-0.0045	0.4145	-0.1255	-0.2095	-0.1365	-0.0665	-0.1825	0.2175	0.1805	-0.2285	0.0045	0.8495
HMDB01254	D-Glucosamine 6-phosphate	C6H14NO8P		-0.141	-0.298	-0.229	0.385	-0.207	-0.351	-0.071	-0.107	-0.329	-0.461	-0.009	-0.212	-0.242	-0.114	-0.32	0.08	0.067	0.203	-0.18	0.015	0.053	0.032	-0.041	-0.131	-0.058	-0.049	-0.009	0.097	-0.305	-0.263	0.171	0.181	0.191	-0.241	-0.35	0.185	0.001	-0.241	-0.016	0.22
HMDB00699	1-methylnicotinamide	C7H8N2O		-0.2495	-0.1525	-0.2135	-0.2115	-0.1405	-0.2735	0.0655	-0.1825	-0.1975	-0.4785	-0.0055	-0.0555	-0.1445	-0.0995	-0.3625	0.1535	0.0555	-0.0455	-0.0115	0.0075	0.0765	0.1325	-1.3725	-1.3445	-1.3375	-0.1085	0.3325	0.4155	-0.4355	-0.0015	-0.1345	-0.0875	0.2945	-0.1035	-0.1245	-0.1025	0.6165	0.0575	-0.3865	-0.0645
HMDB01406	Nicotinamide	C6H6N2O		0.05	-0.305	-0.176	-0.343	-0.142	-0.392	-0.006	-0.252	-0.272	-0.467	-0.274	-0.113	-0.162	-0.322	-0.047	0.073	-0.281	-0.278	-0.218	0.008	0.004	0.108	-0.136	0.122	-0.12	-0.048	-0.118	0.317	-0.387	0.14	0.448	0.239	0.036	-0.3	-0.179	0.016	0.159	-0.12	0.121	0.454
HMDB00071	Deoxyinosine	C10H12N4O4		0.374	-0.337	0.095	-0.925	-0.666	-1.224	0.14	-0.237	-0.919	-0.829	-0.089	-0.283	-0.634	-0.561	0.028	-0.087	-0.416	0.058	-0.586	-0.371	-0.054	0.079	-0.43	-0.047	-0.03	0.715	0.102	0.316	0.035	0.312	0.905	0.357	0.571	0.119	-0.333	0.788	0.234	0.091	0.61	0.289
