# Supplementary material for: Integrated Metabolic Profiling and Gene Expression Analysis Reveals Therapeutic Modalities in Breast Cancer
Source: Research Square preprint supplement (doi:10.21203/rs.3.rs-117384/v1), 2020-12-09
Supplement: Supplementary file 8 [file 7f9fa2b448891242be6fe81d.xlsx]

## Sheet: Table S6
Supplementary Table 6. Transformed metabolomics data of MDA-MB-468 xenograft with drug treatment.
			Inject Name	II_Untreat1	II_Untreat2	II_Untreat3	II_CB8391	II_CB8392	II_CB8393	II_Brequinar1	II_Brequinar2	II_Brequinar3	II_Combo1	II_Combo2	II_Combo3
			Sample Name	Untreat-1	Untreat-2	Untreat-3	CB-839-1	CB-839-2	CB-839-3	Brequinar-1	Brequinar-2	Brequinar-3	Combined-1	Combined-2	Combined-3
HMDB	Metabolite	Chemical Formaula
HMDB00500	4-hydroxybenzoate/Gentisate aldehyde	C7H6O3		0.6245	0.5975	0.3825	-0.0415	0.0255	-0.0825	0.2645	-0.0705	-0.1195	0.0485	-0.1785	-0.0255
HMDB00673	linoleic acid/linoelaidic acid (all trans C18:2)/octadecadienoate (n-C18:2)	C18H32O2		0.105	0.195	0.014	-0.023	0.067	-0.014	-0.085	0.08	0.149	-0.162	-0.199	-0.126
HMDB13076	spermidine dialdehyde-2	C7H13NO2		0.233	0.31	0.239	-0.47	0.066	0.449	-0.066	-0.081	0.129	-0.471	-0.504	-0.369
HMDB12884	adrenochrome/N-benzoylglycinate	C9H9NO3		0.1035	0.0055	0.2665	-0.3305	0.0135	-0.0055	-0.0555	0.1235	0.2585	-0.6025	-0.6885	-0.6125
NA	dopaminochrome	C8H7NO2		0.1325	0.1195	0.1155	-0.0925	-0.1535	-0.0385	-0.0205	0.0205	0.0605	-0.0965	-0.1895	0.0595
HMDB01545	Pyridoxal	C8H9NO3		0.1375	0.1275	0.1355	-0.0855	-0.1315	-0.0435	-0.0165	0.0165	0.0595	-0.0835	-0.1925	0.0525
HMDB00209	phenylacetate/(4-hydroxyphenyl)acetaldehyde	C8H8O2		0.115	0.117	0.14	0.021	-0.095	-0.046	0.057	-0.023	-0.012	0.012	-0.282	-0.02
HMDB06317	trans-Hexadec-2-enoyl carnitine	C23H43NO4		0.124	0.165	0.013	-0.084	0	-0.033	0.024	0.013	0	-0.116	-0.032	-0.051
HMDB02013	butyryl carnitine	C11H21NO4		0.0795	0.0885	0.0625	-0.0985	-0.1705	-0.1215	0.0765	0.0325	0.1095	-0.0685	-0.0505	-0.0325
NA	fructoselysine 3-phosphate	C12H25N2O10P		0.256	0.233	0.371	-0.448	-0.273	-0.233	0.322	0.314	0.35	-0.371	-0.371	-0.361
NA	decenoyl carnitine	C17H31NO4		0.3685	0.2915	0.1625	-0.1945	-0.1645	-0.1025	0.0575	0.1115	0.1075	-0.0725	-0.0575	-0.0625
HMDB06348	pseudoecgonine/ecgonine	C9H15NO3		0.285	0.19	0.126	-0.133	-0.211	-0.096	0.208	0.133	0.096	-0.261	-0.217	-0.256
NA	octenoyl carnitine	C15H27NO4		0.33	0.299	0.216	-0.202	-0.227	-0.126	0.129	0.192	0.126	-0.191	-0.161	-0.222
HMDB06319	alpha-linolenyl carnitine/gamma-linolenyl carnitine	C25H43NO4		0.3045	0.2595	0.0905	-0.2665	-0.1275	-0.1165	0.1825	0.2195	0.1075	-0.1365	-0.0905	-0.0965
HMDB06469	Linoleyl carnitine/Linoelaidyl carnitine	C25H45NO4		0.3275	0.2285	0.1045	-0.2935	-0.1785	-0.1885	0.1775	0.2595	0.1365	-0.1755	-0.1255	-0.1045
HMDB05175	(4-hydroxy-3-methoxyphenyl)acetaldehyde	C9H10O3		0.209	0.029	0.22	-0.151	0.019	-0.068	0.022	-0.016	0.016	-0.12	-0.166	-0.168
HMDB05066	tetradecanoyl carnitine(myristoyl carnitine)	C21H41NO4		0.164	0.108	0.102	-0.112	0.029	-0.023	0.07	-0.008	0.008	-0.091	-0.06	-0.138
NA	succinyl carnitine	C11H19NO6		0.4085	0.2895	0.2045	-0.0155	0.0155	0.0355	-0.0365	-0.1765	0.0315	-0.1955	-0.1635	-0.2235
HMDB00824	propionyl-carnitine	C10H19NO4		0.1485	0.0745	0.1215	0.0155	-0.0805	-0.0465	-0.0085	0.0325	0.0085	-0.1435	-0.0865	-0.1475
HMDB00052	N(omega)-(L-Arginino)succinate	C10H18N4O6		0.3415	0.2685	0.3255	0.0155	-0.0925	-0.0515	-0.0035	0.1315	0.0035	-0.0915	-0.0525	-0.0895
HMDB00895	acetylcholine/4-(trimethylammonio)butanoate	C7H15NO2		0.291	0.168	0.164	-0.026	-0.052	-0.032	0.026	0.085	0.097	-0.035	-0.077	-0.069
HMDB04096	5-Methoxyindoleacetate	C11H11NO3		0.263	0.169	0.266	-0.061	-0.071	0.026	0.042	-0.026	0.063	-0.07	-0.216	-0.166
NA	C14H24O3(4)	C14H24O3		0.26	0.292	0.238	-0.064	-0.061	0.129	-0.048	0.048	0.117	-0.071	-0.208	-0.114
NA	3-oxo-6(R)-hydroxy-tetradec-8-cis-enoate/3-oxo-6(S)-hydroxy-tetradec-8Z-enoate	C14H24O4		0.1505	0.1025	0.1015	-0.0235	-0.0845	0.0165	-0.0665	0.0085	0.0305	-0.0085	-0.0105	-0.0365
HMDB00062	(R)-carnitine	C7H15NO3		0.119	0.12	0.091	-0.061	-0.028	-0.003	0.003	0.017	0.04	-0.03	-0.019	-0.04
HMDB02250	lauroyl carnitine	C19H37NO4		0.212	0.208	0.166	-0.122	-0.058	0.017	0.029	-0.023	0.023	-0.017	-0.033	-0.036
NA	trans-4,5-epoxy-2(E)-decenal	C10H16O2		0.1595	0.1375	0.1385	-0.1245	-0.0665	0.0355	-0.0065	0.0255	-0.0005	-0.0445	-0.0735	0.0005
HMDB00791	octanoyl carnitine/L-Octanoylcarnitine	C15H29NO4		0.3035	0.2215	0.1465	-0.0585	-0.0585	-0.0085	0.0075	-0.0245	0.0085	0.0005	-0.0005	-0.0285
HMDB03357	N(2)-acetyl-L-ornithine	C7H14N2O3		0.2665	0.1645	0.0265	-0.0095	-0.1115	-0.2055	0.0335	0.1065	0.0095	-0.3425	-0.2155	-0.1795
HMDB60244	Phosphodimethylethanolamine	C4H12NO4P		0.1725	0.1755	0.0855	0.0015	-0.0435	-0.0325	0.0365	-0.0015	0.0055	-0.1285	-0.2095	-0.2495
HMDB12897	beta-carboline	C11H8N2		0.332	0.072	0.116	-0.128	-0.032	-0.079	0.039	0.032	0.097	-0.301	-0.398	-0.456
NA	citr_L[e]	C6H13N3O3		0.3	0.161	0.172	-0.176	-0.055	0.003	-0.003	0.041	0.053	-0.218	-0.282	-0.283
HMDB00043	glycine betaine	C5H11NO2		0.0755	0.0675	0.0335	-0.0495	-0.0265	-0.0305	0.0265	0.0495	0.0275	-0.1045	-0.1055	-0.0875
NA	N-Methylethanolamine phosphate	C3H10NO4P		0.3045	0.2335	0.1735	-0.0505	-0.0405	-0.0705	0.0585	0.0955	0.0405	-0.2215	-0.2735	-0.1945
HMDB00092	NN-dimethylglycine	C4H9NO2		0.213	-0.016	0.077	-0.072	-0.073	0.016	0.083	0.089	0.031	-0.15	-0.248	-0.181
NA	3-hydroxy-isovaleryl carnitine	C12H23NO5		0.1535	-0.0055	0.0655	0.0055	-0.0685	-0.1245	0.0805	0.0905	0.0125	-0.1875	-0.2675	-0.1515
NA	C20H30O4(18)	C20H30O4		0.056	0.182	-0.004	-0.163	-0.169	0.004	0.007	0.133	0.063	-0.318	-0.274	-0.281
HMDB04586	Perillic acid	C10H14O2		0.257	0.212	0.047	-0.114	-0.131	0.061	0.082	0.187	-0.047	-0.291	-0.223	-0.128
NA	6(S)-hydroxy-tetradeca-2E4E8Z-trienoate/6(R)-hydroxy-tetradeca-2E4E8Z-trienoate	C14H22O3		0.257	0.292	0.097	-0.157	-0.093	0.003	0.038	0.13	-0.003	-0.102	-0.225	-0.178
NA	3-oxo-8(R)-hydroxy-hexadeca-6E10Z-dienoate/3-oxo-8(S)-hydroxy-hexadeca-6E10Z-dienoate	C16H26O4		0.136	0.101	0.113	0.044	-0.085	-0.038	-0.063	0.038	-0.002	0.002	-0.135	-0.118
HMDB00222	L-palmitoylcarnitine	C23H45NO4		0.02	-0.014	0.165	-0.183	0.007	-0.017	0.084	0.072	0.015	-0.115	-0.02	-0.007
NA	pendtadenoyl carnitine	C22H43NO4		0.068	0.028	0.018	-0.185	0.061	-0.084	0.045	0.041	-0.018	-0.106	-0.038	-0.087
HMDB03459	D-Alanyl-D-alanine	C6H12N2O3		0.1765	0.0945	-0.0425	-0.0955	-0.0775	0.0155	0.0625	-0.0255	-0.0155	-0.1325	0.0305	0.0205
HMDB00161	L-alanine	C3H7NO2		0.1225	0.0505	0.0495	-0.0605	-0.0225	-0.0645	-0.0325	-0.0005	0.0005	0.0405	0.0085	-0.0285
HMDB04362	4-hydroxy-2-nonenal/3,4-epoxynonanal	C9H16O2		0.0925	0.0895	0.0765	-0.0005	-0.0445	0.0475	-0.0025	-0.0425	-0.0265	-0.0005	0.0005	0.0465
HMDB06210	decanoyl carnitine	C17H33NO4		0.203	0.171	0.13	-0.103	-0.063	-0.008	-0.041	-0.067	-0.006	0.006	0.08	0.038
NA	3(S)10(R)-OH-octadeca-6-trans-412-cis-trienoate	C18H30O4		0.0465	0.0955	-0.0305	0.0355	0.0015	-0.0715	-0.0195	0.0045	0.0805	-0.0385	-0.0015	-0.0555
NA	3-oxo-10(R)-hydroxy-octadeca-6E8E12Z-trienoate/3-oxo-10(S)-hydroxy-octadeca-6E8E12Z-trienoate	C18H28O4		0.1775	0.1485	-0.0295	0.1285	0.0035	-0.0425	0.0525	-0.0035	0.1735	-0.0085	-0.0245	-0.0655
HMDB00045	AMP	C10H14N5O7P		-0.15	0.257	0.094	0.15	-0.067	0.069	-0.019	-0.054	-0.089	-0.017	0.047	0.017
HMDB00288	UMP	C9H13N2O9P		0.034	0.223	0.217	0.053	-0.098	-0.034	0.114	-0.073	-0.061	-0.135	0.108	-0.177
HMDB00095	CMP	C9H14N3O8P		0.0855	0.1825	0.1705	0.0575	-0.0255	0.0255	-0.0875	-0.1825	-0.1265	-0.1005	0.0755	-0.1505
HMDB00630	cytosine	C4H5N3O		-0.075	0.077	0.036	0.04	0.114	0.036	-0.023	-0.131	-0.114	-0.103	0.023	-0.137
HMDB00014	2-deoxycytidine	C9H13N3O4		-0.0805	0.0715	0.0105	0.0315	0.1095	0.0225	-0.0105	-0.1375	-0.1065	-0.0675	0.0305	-0.1155
HMDB03501	trans-caffeate/3-(4-hydroxyphenyl)pyruvate	C9H8O4		0.1775	0.0365	0.2185	-0.0595	0.2805	0.0315	-0.3045	-0.0545	-0.0315	0.1805	-0.0765	-0.0655
NA	C20H28O(5)	C20H28O		0.2465	0.0395	-0.0095	0.0545	0.1375	-0.0155	-0.0915	-0.0365	-0.0845	0.1515	0.0095	-0.0355
HMDB28691	L-Alanyl-L-leucine	C9H18N2O3		0.1855	0.0795	-0.0185	-0.0985	0.0185	0.0585	-0.1175	-0.0405	0.0805	-0.1335	-0.0605	0.0455
HMDB00020	4-Hydroxyphenylacetate/2-Hydroxyphenylacetate/3,4-Dihydroxyphenylacetaldehyde	C8H8O3		0.22	0.099	0.034	-0.022	0.183	0.053	-0.022	-0.009	-0.009	-0.052	-0.084	0.009
HMDB02183	docosahexaenoate(DHA)	C22H32O2		0.1415	0.1205	0.0065	-0.0065	0.1595	0.0925	-0.0355	-0.0345	0.1035	-0.0205	-0.0125	-0.0125
HMDB06528	clupanodonic acid/docosa-4,7,10,13,16-pentaenoic acid	C22H34O2		0.114	0.095	0.004	-0.005	0.113	0.06	-0.052	-0.012	0.076	-0.046	-0.038	-0.004
HMDB01043	arachidonic acid	C20H32O2		0.0845	0.1275	0.0005	-0.0095	0.1155	0.0665	-0.0535	-0.0225	0.1065	-0.0085	-0.0105	-0.0005
NA	C16H26O3(4)	C16H26O3		0.1695	0.1145	-0.0155	-0.0375	0.0955	0.0945	-0.0425	0.0075	0.0415	-0.0075	-0.0515	-0.0575
HMDB02925	8,11,14-Eicosatrienoic acid (DGLA)	C20H34O2		0.2045	0.0685	-0.0005	-0.0565	0.1105	0.0575	0.0005	-0.0195	0.1285	-0.0145	-0.0315	-0.0005
NA	CMP-N-acetyl-beta-neuraminate	C20H31N4O16P		0.1725	0.2735	-0.0255	0.0195	0.0875	0.1435	-0.0905	0.0715	-0.1115	-0.0805	-0.1825	-0.0195
HMDB03337	GSSG	C20H32N6O12S2		0.1645	0.2575	0.0155	-0.0015	0.0695	0.1285	-0.0925	0.0015	-0.1105	-0.1065	-0.1925	-0.0655
HMDB00030	Biotin	C10H16N2O3S		-0.022	0.079	0.022	0.119	0.069	0.123	-0.123	-0.181	-0.074	-0.113	0.048	-0.241
HMDB00089	cytidine	C9H13N3O5		0.0795	0.2085	0.1555	0.1835	0.1825	0.2415	-0.1995	-0.3195	-0.1145	-0.2745	-0.0795	-0.3805
HMDB01565	choline phosphate	C5H14NO4P		0.0765	0.0595	0.0675	0.0535	0.0195	0.0615	-0.0195	-0.0555	-0.0285	-0.0325	-0.0265	-0.1015
HMDB00094	citrate/isocitrate	C6H8O7		0.0305	0.0085	0.0695	0.0255	0.0285	0.0365	-0.0805	-0.0545	-0.0455	-0.0585	-0.0085	-0.0545
HMDB06556	L-4-hydroxyglutamate semialdehyde	C5H9NO4		0.0205	0.0565	0.0085	0.0545	0.0185	0.0285	-0.0745	-0.0295	-0.0085	-0.1145	-0.0755	-0.2075
HMDB00148	L-glutamate	C5H9NO4		0.0205	0.0555	0.0085	0.0545	0.0185	0.0285	-0.0745	-0.0305	-0.0085	-0.1135	-0.0755	-0.2075
HMDB00097	choline	C5H13NO		0.0465	0.0565	0.0135	0.0885	0.0325	0.0395	-0.0185	-0.0165	-0.0135	-0.0345	-0.0515	-0.0685
HMDB06009	isoputreanine/putreanine	C7H16N2O2		0.131	-0.038	0.076	0.005	0.059	0.146	-0.034	-0.043	-0.001	0.001	-0.106	-0.008
HMDB02005	Methionine sulfoxide	C5H11NO3S		0.203	0.034	0.133	-0.05	0.113	0.184	-0.124	-0.107	-0.01	0.01	-0.157	-0.199
HMDB00925	Trimethylamine N-oxide	C3H9NO		0.22	-0.005	0.169	-0.133	0.082	0.131	-0.094	-0.105	0.005	0.026	-0.102	-0.284
HMDB02203	w-hydroxydecanoicacid	C10H20O3		0.189	0.177	0.236	0.075	-0.004	0.155	-0.089	-0.113	-0.02	0.004	-0.038	-0.085
HMDB00511	caprate	C10H20O2		0.1575	0.1645	0.2145	-0.0005	0.0005	0.1535	-0.0585	-0.1035	-0.0345	0.0225	-0.0795	-0.0205
NA	omega hydroxy dodecanoate (n-C12:0)	C12H24O3		0.144	0.158	0.179	0.003	-0.01	0.157	-0.138	-0.099	-0.062	0.022	-0.047	-0.003
NA	4(R)-hydroxy-dodec-6Z-enoate/4(S)-hydroxy-dodec-6Z-enoate	C12H22O3		0.1545	0.2605	0.2245	0.0355	-0.0035	0.2195	-0.0725	-0.0725	0.0035	-0.0695	-0.1185	-0.0875
HMDB00638	laurate	C12H24O2		0.169	0.178	0.124	0.003	0.11	0.203	-0.093	-0.142	-0.003	-0.041	-0.127	-0.015
HMDB01511	N-phosphocreatinate	C4H10N3O5P		0.772	0.493	0.317	0.034	0.063	-0.034	-0.681	-0.315	-0.188	0.065	-0.182	-0.282
NA	C20H32O3(12)	C20H32O3		0.653	0.341	0.2	0.07	0.177	0.194	-0.218	-0.07	-0.076	-0.093	-0.081	-0.076
HMDB00156	malate(2-)	C4H6O5		0.1325	0.0625	0.0745	0.0445	0.0225	0.0435	-0.0425	-0.0325	-0.0385	-0.0335	-0.0225	-0.0615
HMDB00123	glycine	C2H5NO2		0.13	0.076	0.019	0.011	0.005	-0.018	-0.012	0.009	-0.01	-0.005	-0.043	-0.022
HMDB06334	3-dehydro-L-gulonate/D-glucuronate/L-iduronate	C6H10O7		0.152	0.099	0.052	0.018	-0.023	0.053	-0.049	-0.018	0.116	-0.044	-0.163	-0.114
HMDB00050	adenosine	C10H13N5O4		0.7715	0.7645	0.6435	0.1535	0.4355	-0.0485	-0.5075	-1.0415	0.0485	-0.5875	-1.7205	-1.5685
HMDB00162	L-proline	C5H9NO2		0.1185	-0.0005	0.0745	0.0255	0.0075	0.0005	-0.0825	-0.0425	0.0075	-0.0655	-0.0745	-0.1475
HMDB60256	L-xylonate/L-lyxonate	C5H10O6		0.1175	0.0185	0.0745	0.0795	0.0445	0.0275	-0.0635	-0.0275	-0.0185	-0.0525	-0.0845	-0.1075
HMDB06471	Methylisocitric acid/2-methylcitrate	C7H10O7		0.0835	0.0035	-0.0035	0.0815	0.0775	0.1775	-0.1695	-0.0465	0.0195	-0.1955	-0.2805	-0.2105
HMDB00296	uridine	C9H12N2O6		0.1575	-0.0125	0.0355	0.0785	-0.0065	0.0455	0.0455	-0.0895	-0.0885	-0.1165	0.0065	-0.2345
HMDB00208	2-oxoglutarate(2-)	C5H6O5		0.254	0.111	0.361	0.325	0.056	0.067	-0.056	-0.121	-0.245	-0.196	-0.107	-0.272
HMDB00099	L-cystathionine	C7H14N2O4S		0.2165	-0.0305	0.1015	0.2855	0.0995	0.0035	0.0245	-0.0035	-0.1145	-0.0945	-0.1325	-0.1445
HMDB00190	lactate	C3H6O3		0.0425	-0.0605	0.0435	0.0745	0.0095	-0.0435	0.0105	0.0185	-0.0515	-0.0095	-0.0975	-0.1075
HMDB02366	tiglyl carnitine	C12H21NO4		0.007	0	0.045	0.11	-0.045	0.033	0.006	-0.004	0	-0.081	-0.032	-0.083
HMDB03229	palmitoleate	C16H30O2		-0.064	0.185	-0.056	0.392	0.224	0.192	-0.215	-0.116	-0.006	0.004	-0.004	0.046
HMDB00207	oleic acid/elaidate/trans-vaccenate	C18H34O2		-0.0005	0.0115	-0.0335	0.2065	0.2275	0.1435	-0.1825	-0.0855	0.0725	-0.0195	-0.0475	0.0005
NA	tetradecenoate (n-C14:1)	C14H26O2		0.021	0.177	0.041	0.094	0.126	0.233	-0.272	-0.223	-0.076	-0.053	-0.135	-0.021
HMDB00929	L-tryptophan	C11H12N2O2		0.016	0.058	0.025	0.08	0.028	0.022	-0.108	-0.127	-0.036	-0.016	-0.063	-0.055
HMDB01031	2-deoxy-D-ribose 5-phosphate/2-Deoxy-D-ribose 1-phosphate	C5H11O7P		-0.015	0.051	0.015	0.163	0.13	0.165	-0.099	-0.167	-0.125	0.028	-0.075	-0.042
HMDB04089	N-formylanthranilate/noradrenochrome	C8H7NO3		0.1135	-0.0255	0.0295	0.2225	0.1295	0.1355	-0.1375	-0.2165	-0.0155	0.0155	-0.1395	-0.0915
HMDB00806	myristate	C14H28O2		0.028	0.033	-0.018	0.029	0.113	0.035	-0.083	-0.129	-0.053	0.018	-0.159	-0.112
NA	omega hydroxy tetradecanoate (n-C14:0)	C14H28O3		0.0585	0.0375	0.0075	-0.0295	-0.0015	0.0935	-0.1575	-0.0995	-0.0145	0.0015	-0.0715	0.0025
HMDB00175	IMP	C10H13N4O8P		-0.047	0.081	0.201	-0.075	0.282	0.28	-0.311	-0.329	-0.078	0.004	0.03	-0.004
HMDB00064	creatine	C4H9N3O2		0.027	0.006	-0.002	-0.036	0.05	0.031	-0.064	-0.039	-0.039	0.002	0.009	-0.011
NA	C20H30O2(4)	C20H30O2		0.0085	0.0965	-0.0385	-0.0725	0.0295	-0.0295	0.0015	-0.0185	0.0725	0.0045	-0.0015	-0.0075
HMDB03345	alpha-D-glucose	C6H12O6		-0.051	0.269	0.024	-0.015	-0.046	-0.079	-0.149	-0.092	0.119	0.015	0.057	0.095
HMDB02266	2-methylglutaconic acid	C6H8O4		-0.125	0.309	-0.028	-0.001	0.001	-0.034	-0.115	-0.123	0.107	0.108	0.127	0.153
NA	C18H32O4(3)	C18H32O4		0.0035	0.0785	0.0185	-0.0035	0.0555	-0.0505	-0.0545	-0.0235	0.1155	0.0095	-0.0175	-0.0345
HMDB60278	fructoseglycine	C8H15NO7		-0.0935	0.8645	0.2795	0.0935	0.3035	-0.1595	-0.8395	-0.2475	0.4595	-0.1105	0.3885	-0.1595
	C27H42O4(3)	C27H42O4		0.0205	0.0275	-0.0305	-0.0725	-0.0205	0.0425	0.0365	-0.0725	0.0345	0.1205	-0.1085	-0.0515
HMDB01413	CDPcholine	C14H26N4O11P2		-0.144	-0.032	-0.096	0.032	0.082	0.057	0.158	0.141	-0.064	-0.018	0.018	-0.022
HMDB01564	CDP-ethanolamine	C11H20N4O11P2		-0.0175	0.0425	-0.0145	0.0145	0.0735	0.0585	0.1195	0.0805	-0.0975	-0.0175	-0.0265	-0.0435
HMDB01123	anthranilate	C7H7NO2		0.054	0.078	-0.031	0.009	0.043	-0.029	0.135	-0.161	0.036	-0.159	-0.009	-0.116
HMDB00300	uracil	C4H4N2O2		-0.0035	0.0085	-0.0285	0.0025	-0.0025	0.0055	0.1205	0.0575	0.0375	-0.1945	-0.0395	-0.2885
HMDB00262	thymine/imidazol-4-ylacetate	C5H6N2O2		0.127	0.062	-0.008	-0.03	0.138	-0.017	0.146	0.048	0.008	-0.2	-0.099	-0.353
HMDB00286	UDP-D-glucose/UDP-D-galactose	C15H24N2O17P2		-0.0515	-0.0445	0.1395	0.0575	-0.0165	0.0035	0.2025	0.0565	-0.0035	-0.2015	0.2025	-0.1745
HMDB00290	UDP-N-acetyl-alpha-D-glucosamine/UDP-N-acetyl-alpha-D-galactosamine	C17H27N3O17P2		-0.271	0.057	-0.094	0.06	-0.118	0.059	0.097	0.027	-0.018	-0.133	0.018	-0.228
HMDB00267	5-oxoproline/L-1-Pyrroline-3-hydroxy-5-carboxylate	C5H7NO3		0.0155	-0.0265	0.0155	0.0635	0.2205	0.0395	-0.1765	0.3995	-0.0155	-0.1725	-0.1235	-0.1955
HMDB04701	9(10)-EpOME/12(13)-EpOME	C18H32O3		-0.0185	0.1315	-0.0695	-0.0215	0.0525	0.0185	-0.0715	0.2325	0.1005	-0.1225	-0.1105	0.0345
HMDB00017	4-pyridoxate	C8H9NO4		-0.041	0.045	0.045	-0.004	-0.091	-0.04	0.004	0.245	0.159	-0.171	-0.19	0.037
HMDB01241	2-aminomuconate	C6H7NO4		-0.105	0.07	-0.027	-0.083	0.058	-0.037	-0.022	0.225	0.022	0.057	0.026	-0.045
HMDB00812	N-acetyl-L-aspartate/2-Amino-3-oxoadipate	C6H9NO5		-0.116	0.054	-0.078	-0.072	0.063	0.001	-0.046	0.236	0.015	-0.001	0.002	-0.036
HMDB00517	arginine	C6H14N4O2		-0.2575	-0.0105	-0.0335	-0.0185	0.0235	-0.1075	0.0155	0.3015	0.0105	-0.0895	0.0325	0.0315
HMDB00251	Taurine	C2H7NO3S		-0.089	-0.003	-0.004	0.007	0.003	0.006	-0.044	0.013	-0.003	-0.005	0.01	0.003
HMDB04704	9,10-hydroxyoctadec-12(Z)-enoate/12,13-hydroxyoctadec-9(Z)-enoate	C18H34O4		-0.1115	0.0805	-0.1045	0.0905	0.0215	-0.0215	-0.0385	0.0805	0.0275	-0.0575	-0.0605	0.0255
HMDB13333	3-hydroxyhexadecenoylcarnitine	C23H43NO5		-0.1795	0.0295	-0.1135	0.1785	0.0095	-0.0205	-0.0965	0.0225	0.0235	0.0375	-0.0215	-0.0095
HMDB00126	Glycerol 3-phosphate	C3H9O6P		-0.1665	0.0705	-0.0975	0.0955	0.1545	0.0995	-0.0725	0.0255	0.0235	-0.0235	-0.1605	-0.1185
HMDB00721	Glycylproline/L-Prolinylglycine	C7H12N2O3		0.1015	-0.0375	-0.1015	-0.0295	0.0485	-0.0045	-0.1275	0.0575	-0.0495	0.0785	0.0045	0.0375
HMDB00187	L-serine	C3H7NO3		0.0015	-0.0005	-0.0525	-0.0005	0.0005	-0.0515	-0.0555	0.0455	-0.0055	0.0445	0.0025	0.0085
NA	3(S)6(R)-dihydroxy-tetradec-8Z-enoate/3(S)6(S)-dihydroxy-tetradec-8Z-enoate	C14H26O4		0.084	0.042	0.006	0.011	-0.056	-0.006	-0.068	-0.031	-0.094	0.035	0.062	-0.034
HMDB00134	fumarate	C4H4O4		0.057	-0.014	0.005	0.011	-0.023	-0.005	-0.035	-0.023	-0.067	0.04	0.023	0.027
HMDB00243	pyruvate	C3H4O3		0.159	0.007	-0.008	0.117	-0.059	-0.093	0.046	0.003	-0.117	0.021	-0.003	-0.017
HMDB00653	cholesterol sulfate	C27H46O4S		0.5	-0.137	-0.143	0.315	-0.038	0.061	-0.155	0.038	-0.113	-0.203	0.192	0.147
HMDB00072	cis-aconitate	C6H6O6		0.0605	-0.0095	-0.0505	0.0375	-0.0135	0.0065	-0.0465	0.0155	-0.0635	-0.0065	0.0135	0.0145
NA	4-nitrophenolate	C6H5NO3		0.33	0.1	-0.057	0	0	-0.06	0.017	-0.009	-0.058	0.012	-0.078	0.109
HMDB03375	limonene/(+)-alpha-pinene	C10H16		0.1685	0.0125	-0.0585	0.0625	-0.0315	-0.0375	0.0295	0.0005	0.0405	-0.0035	-0.0005	-0.0085
HMDB12535	12S-HHT	C17H28O3		0.2365	0.1095	-0.0975	0.0675	-0.0595	-0.0655	-0.0285	0.0025	-0.0025	0.0065	0.0265	-0.0615
HMDB00139	D-glycerate	C3H6O4		0.1665	0.0115	-0.0235	0.0065	0.0005	0.0135	-0.0245	-0.0005	0.0475	-0.0215	-0.0545	-0.0355
HMDB00263	Phosphoenolpyruvate	C3H5O6P		0.4405	0.0835	-0.1215	0.0245	0.0875	0.0675	-0.1355	-0.0645	-0.0055	0.0055	-0.0265	-0.0185
NA	C20H28O2(7)	C20H28O2		0.2435	0.0615	-0.1165	0.0565	-0.0955	0.0195	0.0005	-0.0005	-0.1965	-0.0725	0.0015	-0.0375
HMDB11745	N-Acetylmethionine	C7H13NO3S		0.2025	-0.0035	-0.1805	0.0615	-0.0175	0.1025	-0.0375	-0.1095	-0.0275	0.0035	0.0245	0.0235
	C4H6O3(3)	C4H6O3		0.082	0.031	-0.039	0.005	-0.025	-0.044	-0.005	-0.081	0.009	0.052	-0.009	0.043
HMDB00252	sphingosine/(2S)-1-hydroxy-3-oxooctadecan-2-aminium	C18H37NO2		0.114	-0.044	-0.021	0.007	-0.071	-0.061	0.031	-0.007	-0.024	0.021	0.076	0.079
HMDB00012	Deoxyuridine	C9H12N2O5		0.2135	-0.1165	-0.1355	-0.1105	0.0335	-0.0695	0.1745	0.0265	-0.0265	0.0355	0.0335	-0.0875
HMDB00132	Guanine	C5H5N5O		0.095	-0.019	-0.099	0.013	-0.004	-0.01	0.077	0.006	0.019	0.004	-0.02	-0.071
HMDB06535	beta-1-4-mannose-N-acetylglucosamine	C14H25NO11		0.157	0	0	0.001	-0.083	-0.007	0.109	0.069	-0.029	0.057	-0.029	-0.014
HMDB02820	Methylimidazoleacetic acid	C6H8N2O2		0.0145	-0.2555	-0.1355	0.1235	0.0655	-0.0665	-0.1065	0.0605	-0.0145	-0.0865	0.0815	0.2075
HMDB60067	CMP-2-aminoethylphosphonate	C11H20N4O10P2		0.001	-0.001	-0.07	-0.009	0.009	-0.037	0.064	0.018	-0.271	0.029	-0.001	0.081
HMDB00902	NAD+	C21H27N7O14P2		-0.0055	0.0055	-0.0475	-0.0355	-0.0725	-0.0505	0.1135	0.0685	-0.1395	0.0495	0.0195	0.1155
HMDB60072	CMP-N-trimethyl-2-aminoethylphosphonate	C14H26N4O10P2		-0.012	-0.005	-0.102	0.092	0.028	0.005	0.066	0.087	-0.073	-0.021	-0.016	0.092
HMDB00742	L-homocysteine	C4H9NO2S		-0.057	-0.01	-0.32	0.01	-0.178	0.026	0.05	0.048	-0.181	-0.218	0.058	0.26
NA	C4H9NO2(4)	C4H9NO2		0.1315	-0.0605	-0.0015	-0.0285	-0.0955	0.0425	0.0015	0.0185	-0.0425	-0.1495	0.0685	0.1985
HMDB01422	3-Hydroxy-N6N6N6-trimethyl-L-lysine	C9H20N2O3		0.0265	-0.0375	0.0125	0.0575	-0.0355	0.0215	0.0345	-0.0525	-0.0495	-0.0645	-0.0125	0.0455
HMDB00847	nonanoate	C9H18O2		0.1165	0.0055	-0.0925	0.0745	-0.0655	0.0055	0.0145	-0.1135	-0.1285	-0.0995	-0.0055	0.2555
HMDB13336	3-hydroxyhexadecanoylcarnitine	C23H45NO5		-0.1945	-0.0595	0.0715	-0.1075	-0.0255	-0.0165	0.0165	0.0185	0.0325	-0.0175	0.0375	0.0175
HMDB06210	heptadecanoyl carnitine	C24H47NO4		-0.0715	-0.1175	0.1335	-0.1995	0.0045	-0.0395	0.0115	0.0775	-0.0045	-0.0745	0.0105	0.0995
HMDB00848	stearoylcarnitine	C25H49NO4		-0.126	-0.202	0.218	-0.26	-0.131	0.03	-0.022	0.077	0.022	-0.05	0.085	0.212
HMDB06464	Elaidic carnitine/Vaccenyl carnitine	C25H47NO4		-0.0035	-0.0365	0.0075	-0.1335	0.0165	-0.0335	0.0035	0.0365	-0.0215	-0.0665	0.0125	0.0445
HMDB00271	sarcosine	C3H7NO2		0.161	-0.071	0.005	-0.3	-0.134	-0.175	-0.005	0.011	-0.033	0.058	0.063	0.018
HMDB60065	N-methyl-467-trihydroxy-1234-tetrahydroisoquinoline	C10H13NO3		0.1425	0.0325	-0.1185	-0.6715	-0.3485	-0.1755	0.0095	0.0305	-0.0095	0.0295	0.0745	-0.0185
HMDB60158	Tetracosatetraenoyl carnitine	C31H53NO4		-0.043	-0.199	-0.002	-0.631	-0.483	-0.393	0.214	0.107	0.169	0.002	0.187	0.217
NA	C6H11NO3(4)	C6H11NO3		0.058	0.046	-0.05	-0.102	-0.051	-0.01	-0.045	-0.027	0.028	0.01	0.02	0.038
METPA0491	N2-Formyl-N1-(5-phospho-D-ribosyl)glycinamide	C8H15N2O9P		0.0905	-0.0225	0.1355	0.0225	-0.1715	-0.0615	0.1545	0.2795	0.3575	-0.1565	-0.0465	-0.2115
HMDB00211	myo-inositol	C6H12O6		-0.03	0.041	-0.006	-0.124	-0.175	-0.18	0.182	0.157	0.022	-0.022	0.006	0.015
NA	C6H12O6(5)	C6H12O6		-0.029	0.042	-0.006	-0.124	-0.175	-0.18	0.182	0.157	0.023	-0.021	0.006	0.016
HMDB00239	Pyridoxine/Norepinephrine-1	C8H11NO3		0.066	0.064	-0.03	-0.112	-0.153	-0.088	0.174	0.145	0.213	-0.117	-0.159	0.03
HMDB00201	O-acetylcarnitine	C9H17NO4		0.151	-0.011	0.011	-0.011	-0.081	-0.126	0.145	0.15	0.101	-0.027	-0.06	0.015
HMDB00034	adenine	C5H5N5		-0.172	0.002	-0.327	-0.047	-0.055	-0.127	0.104	0.067	0.038	0.028	-0.002	0.169
HMDB00068	Adrenaline/L-Normetanephrine	C9H13NO3		-0.0005	0.0005	-0.0595	-0.0105	-0.1115	-0.0545	0.0645	0.0395	-0.0155	0.0685	0.0955	0.0575
HMDB00086	sn-Glycero-3-phosphocholine	C8H20NO6P		-0.0225	-0.1145	-0.0575	0.0225	-0.1425	-0.1385	0.0245	0.0525	-0.0615	0.0595	0.0875	0.0355
NA	NeuNGc	C11H19NO10		0.0555	-0.1245	-0.1915	-0.2095	-0.0895	-0.1875	0.1595	-0.0025	0.0025	0.0965	0.0805	0.1645
HMDB00230	N-acetylneuraminic acid	C11H19NO9		-0.1555	-0.1815	-0.1655	-0.1845	-0.1385	-0.1305	0.3065	0.1305	0.2125	0.3135	0.3135	0.6305
NA	gama-L-glutamyl-L-alpha-aminobutyrate	C9H16N2O5		-0.2235	-0.2295	-0.2655	-0.1255	-0.0855	-0.2345	0.1405	0.0915	0.0855	0.1195	0.1675	0.1975
HMDB00828	N-Carbamoyl-L-aspartate	C5H8N2O5		-0.6355	-0.5515	-0.6905	-0.6985	-0.6535	-0.7055	0.6245	0.7015	0.5515	1.0355	0.8985	1.0925
HMDB03349	dihydroorotate	C5H6N2O4		-0.7385	-0.7295	-0.5965	-0.5935	-0.5575	-0.6215	0.6605	0.7115	0.5575	0.8835	0.7615	0.9005
HMDB00076	5,6-dihydrouracil/L-3-Cyanoalanine	C4H6N2O2		-0.729	-0.719	-0.62	-0.594	-0.568	-0.602	0.67	0.737	0.568	0.904	0.784	0.923
HMDB13127	3-Hydroxybutyrylcarnitine	C11H21NO5		-0.1205	0.0135	-0.1085	-0.1425	-0.2255	-0.0935	0.1525	0.1155	0.1565	-0.0135	0.1795	0.1885
HMDB00214	Ornithine	C5H12N2O2		-0.0965	-0.1425	-0.0325	-0.0485	-0.0075	-0.0035	0.0565	0.1065	0.0635	0.1155	0.0035	0.0375
HMDB02757	L-cysteate	C3H7NO5S		-0.087	-0.141	-0.06	0.004	-0.028	0.046	0.137	0.054	0.072	0.07	-0.084	-0.004
HMDB00254	succinate(2-)	C4H6O4		-0.052	-0.002	-0.083	-0.066	0.015	0.002	0.053	0.078	0.086	0.019	-0.025	-0.003
HMDB01248	Flavin adenine dinucleotide oxidized	C27H33N9O15P2		-0.1695	-0.0075	-0.1125	-0.0205	0.0265	-0.0235	0.1025	-0.0665	0.0465	0.0075	0.0935	0.1385
NA	L-Iditol/D-glucitol/galactitol	C6H14O6		-0.24	-0.145	-0.135	0.109	-0.015	-0.185	0.015	0.02	-0.052	0.134	0.147	0.136
NA	N-acetyl-seryl-aspartate	C9H14N2O7		-0.077	-0.101	-0.059	0.033	-0.016	-0.034	0.026	0.016	-0.076	0.038	0.121	0.105
METPA0585	Sedoheptulose 7-phosphate	C7H15O10P		-0.103	-0.045	-0.002	0.063	-0.004	0.002	0.036	-0.021	-0.075	0.078	0.215	0.177
HMDB01401	G6P/F6P	C6H13O9P		-0.136	-0.116	-0.092	-0.007	-0.003	-0.06	0.1	0.028	0.003	0.073	0.209	0.218
HMDB01316	6-Phosphogluconic acid	C6H13O10P		-0.6175	-0.1625	-0.1505	-0.0025	-0.0745	-0.1075	0.1885	0.0025	0.1105	0.2735	0.5665	0.5665
HMDB60444	beta-D-Fructose 1,6-bisphosphate	C6H14O12P2		-0.9025	-0.2815	-0.0625	-0.0115	-0.0665	-0.1215	0.1115	0.0115	0.0535	0.0865	0.3295	0.3125
HMDB01423	Coenzyme A	C21H36N7O16P3S		-1.0395	-0.3025	-0.0055	0.0055	-0.0365	0.0115	0.1895	-0.0615	-0.0205	0.0335	0.2165	0.1765
HMDB60274	sedoheptulose 1,7-bisphosphate	C7H16O13P2		-1.655	-0.6	-0.007	0.024	-0.002	0.079	0.002	-0.153	-0.119	0.055	0.274	0.181
NA	7,9-dihydro-1H-purine-2688(3H)-trione	C5H4N4O3		-0.163	-0.054	-0.075	-0.026	-0.011	0.001	-0.001	0.017	0.017	0.066	0.046	0.062
HMDB28848	Glycyl-phenylalanine	C11H14N2O3		-0.4825	-0.2685	-0.3515	-0.0145	-0.0825	-0.1755	0.0755	0.1135	0.0145	0.0405	0.1735	0.1825
HMDB00292	Xanthine	C5H4N4O2		-0.1485	-0.1205	-0.1605	0.0255	-0.0085	-0.0135	0.0555	0.0815	0.0245	-0.0075	0.0165	0.0075
HMDB00299	xanthosine	C10H12N4O6		-0.473	-0.248	-0.4	0.002	-0.141	-0.159	0.166	0.16	-0.001	0.006	0.001	0.054
HMDB00244	Riboflavin	C17H20N4O6		-0.1895	-0.1365	-0.1095	0.0255	-0.1155	-0.1045	0.0475	0.0945	0.0125	0.0005	-0.0005	0.0465
HMDB01018	UDP-alpha-D-xylose	C14H22N2O16P2		-0.325	-0.159	-0.151	0.007	-0.025	0.018	0.1	0.138	0.07	-0.053	0.077	-0.007
HMDB00574	L-cysteine	C3H7NO2S		-0.625	-0.315	-0.185	-0.035	-0.075	-0.008	0.113	0.05	0.078	0.008	0.115	0.042
HMDB01163	GDP-D-mannose	C16H25N5O16P2		-0.482	-0.36	-0.045	0.002	-0.102	-0.002	0.193	0.084	-0.075	0.132	0.303	0.307
HMDB42012	(-)-Salsolinol/NN-dimethyldopaminequinone-1	C10H13NO2		-0.4405	-0.3405	-0.1445	-0.0025	-0.0455	-0.0755	0.0595	0.0385	0.0025	0.0415	0.1335	0.1835
HMDB01185	S-adenosyl-L-methionine	C15H22N6O5S		-0.598	-0.5	-0.289	0.045	-0.118	-0.121	0.205	0.125	-0.045	0.104	0.08	0.139
HMDB00935	UDP-D-glucuronate	C15H22N2O18P2		-0.4545	-0.2135	0.0245	0.0215	-0.0215	0.0635	0.0465	-0.1065	-0.1915	-0.1115	0.1545	0.0275
NA	gama-glutamylglutathione	C15H24N4O9S		-0.457	-0.304	0.159	0.282	-0.077	-0.022	0.263	0.022	-0.243	-0.071	0.392	0.337
HMDB01201	GDP	C10H15N5O11P2		-0.2955	-0.2645	0.0495	0.1375	-0.0375	-0.0175	0.1385	-0.0665	-0.0845	0.0175	0.1965	0.1585
HMDB01341	ADP	C10H15N5O10P2		-0.277	-0.176	0.035	-0.001	-0.121	-0.033	0.048	0.001	-0.13	0.024	0.198	0.154
HMDB01397	GMP	C10H14N5O8P		-0.1335	-0.0745	0.0905	0.0935	-0.0795	0.0085	-0.0025	-0.0415	-0.0705	0.0025	0.1215	0.0525
HMDB06369	ADP-mannose/GDP-L-fucose/ADP alpha-D-glucoside	C16H25N5O15P2		-0.198	-0.314	0.048	0.042	-0.072	0.044	-0.032	-0.066	-0.137	0.032	0.126	0.155
NA	C9H13N5O3(4)	C9H13N5O3		-0.2485	-0.0095	-0.0475	0.0175	0.0095	0.0125	-0.0465	-0.0975	-0.0725	0.1035	0.0665	0.0705
HMDB01000	dUDP	C9H14N2O11P2		-0.2455	-0.1695	-0.0955	0.0895	-0.0205	0.0855	0.0035	-0.1075	-0.0035	0.0275	0.0995	0.1525
HMDB00641	L-glutamine	C5H10N2O3		-0.3335	-0.1035	-0.2435	0.2085	0.2045	0.1985	-0.1225	-0.1625	-0.0805	0.0805	0.1125	0.0845
HMDB59629	(R)-mevalonate	C6H12O4		-0.385	-0.166	-0.359	0.189	0.18	0.144	-0.13	-0.172	-0.101	0.109	0.101	0.117
HMDB06248	gama-L-glutamyl-L-alanine/5-L-Glutamyl-L-alanine-1	C8H14N2O5		-0.6095	-0.3615	-0.5685	0.1325	0.0875	0.0935	-0.0875	-0.1765	-0.2135	0.1745	0.2705	0.2515
HMDB00168	L-asparagine	C4H8N2O3		-0.044	-0.029	-0.091	0.066	0.029	0.04	-0.051	-0.049	-0.051	0.072	0.035	0.04
HMDB00026	Ureidopropionic acid/Glycyl-glycine	C4H8N2O3		-0.044	-0.029	-0.091	0.066	0.029	0.04	-0.051	-0.049	-0.051	0.072	0.035	0.04
HMDB00301	Urocanate	C6H6N2O2		-0.085	-0.142	-0.148	0.014	0.009	0.016	-0.009	-0.031	-0.01	0.028	0.06	0.08
NA	C20H30O(4)	C20H30O		-0.0745	-0.4125	-0.2095	0.0515	0.0075	0.0615	-0.0325	-0.0915	-0.0075	0.1945	0.2415	0.1595
HMDB00807	D-Glycerate 3-phosphate/D-Glycerate 2-phosphate	C3H7O7P		-0.196	-0.32	-0.078	-0.019	0.079	0.019	-0.053	-0.042	0.044	0.026	0.1	0.109
HMDB00071	Deoxyinosine	C10H12N4O4		-0.1	-0.278	-0.21	-0.033	0.174	-0.107	0.033	0.094	-0.11	0.101	0.128	0.137
HMDB00195	inosine	C10H12N4O5		-0.112	-0.122	-0.111	0.013	0.081	-0.013	0.024	-0.031	-0.04	0.066	0.042	0.076
HMDB00538	ATP	C10H16N5O13P3		-0.2305	-0.4575	-0.2585	0.1745	0.0215	-0.0985	0.0965	0.0945	-0.1115	-0.0215	0.0745	0.1265
HMDB03224	2-deoxy-D-ribose	C5H10O4		-0.0775	-0.0465	-0.0965	0.0335	0.0395	-0.0425	0.0275	-0.0275	-0.0325	0.1495	0.0945	0.1405
HMDB01254	D-Glucosamine 6-phosphate	C6H14NO8P		-0.021	-0.083	-0.122	0.02	0.018	-0.012	-0.057	0.012	-0.087	0.096	0.118	0.078
HMDB00694	2-Hydroxyglutarate	C5H8O5		0.005	-0.056	-0.095	0.001	-0.005	0.006	-0.001	-0.056	-0.079	0.127	0.114	0.12
HMDB01321	D-Erythrose 4-phosphate	C4H9O7P		-0.0335	-0.0975	-0.0725	-0.0165	0.0375	-0.0525	0.1175	-0.0945	0.0165	0.1125	0.1625	0.1975
HMDB00939	S-Adenosyl-L-homocysteine	C14H20N6O5S		-0.0535	-0.0685	-0.0225	0.0715	-0.0235	-0.0235	0.0165	0.0005	0.0345	-0.0005	0.0695	0.0105
HMDB00217	NADP+	C21H28N7O17P3		-0.3555	-0.0705	0.1245	-0.0805	0.0105	-0.0105	0.1015	0.0885	-0.2555	-0.0395	0.0915	0.2455
HMDB01406	Nicotinamide	C6H6N2O		-0.1265	-0.0345	0.0055	0.0395	0.0155	-0.0355	-0.0055	0.0065	-0.0265	-0.0245	0.0445	0.0385
HMDB00078	L-cysteinylglycine	C5H10N2O3S		-0.2585	0.0085	-0.0365	0.0195	0.0245	-0.0495	0.0775	-0.0085	-0.0575	-0.0765	0.1025	0.0585
HMDB00125	glutathione	C10H17N3O6S		-0.2385	0.0295	0.0455	0.0205	0.0275	-0.0315	0.0165	-0.0575	-0.0725	-0.1245	0.0585	-0.0165
HMDB03290	gulonate	C6H12O7		-0.1295	-0.0235	-0.0095	0.1135	-0.0225	-0.0155	0.0175	0.0695	-0.0665	0.0095	0.0295	0.0265
NA	L-arabinitol/xylitol/D-ribitol	C5H12O5		-0.114	-0.046	-0.06	0.011	-0.103	0.001	0.028	-0.048	0.036	-0.001	0.008	0.02
HMDB01138	N-acetyl-L-glutamate	C7H11NO5		-0.015	0.014	-0.007	0.047	-0.05	-0.011	-0.008	0.007	-0.093	0.046	0.048	0.017
HMDB01178	ADP-ribose	C15H23N5O14P2		-0.2655	0.0425	-0.1215	0.0595	-0.1525	0.0145	-0.0735	-0.0125	-0.1075	0.0515	0.0125	0.1255
HMDB01487	NADH	C21H29N7O14P2		-0.3755	0.0205	-0.1215	-0.0205	-0.1715	-0.0545	0.1775	0.1215	-0.1605	0.1645	0.1195	0.2225
HMDB06293	L-erythrulose	C4H8O4		-0.06	0.141	-0.11	0.002	-0.104	-0.101	-0.002	-0.051	0.037	0.087	0.077	0.213
HMDB00191	aspartate	C4H7NO4		-0.0485	0.0295	0.0375	-0.0325	-0.0995	-0.1075	-0.0295	0.0355	-0.0965	0.1135	0.1415	0.2245
HMDB00763	5-Hydroxyindoleacetate	C10H9NO3		-0.362	0.1	-0.158	0.151	-0.167	-0.253	-0.207	0.075	-0.075	0.316	0.34	0.25
HMDB00684	L-kynurenine/Formyl-5-hydroxykynurenamine	C10H12N2O3		-0.158	0.12	-0.075	0.156	-0.137	-0.18	-0.097	0.051	-0.051	0.289	0.313	0.24
HMDB00425	3-Deoxy-D-glycero-D-galacto-2-nonulosonic acid	C9H16O9		-0.029	0.035	-0.085	0.052	-0.069	-0.034	0.05	-0.001	-0.009	0.079	0.026	0.001
HMDB01473	Dihydroxyacetone phosphate	C3H7O6P		0.0165	0.0015	-0.0885	0.0215	-0.0695	-0.0505	-0.0015	-0.0605	-0.0115	0.0695	0.0775	0.0205
HMDB00285	UTP	C9H15N2O15P3		0.1275	-0.5295	0.0395	0.2045	-0.0795	-0.1535	0.2825	0.1675	-0.1775	-0.1635	0.0305	-0.0305
HMDB00562	creatinine	C4H7N3O		-0.025	-0.108	0.011	0.152	0.044	-0.037	0.052	0.111	-0.057	0.002	-0.095	-0.002
HMDB00210	(R)-Pantothenate	C9H17NO5		-0.056	-0.671	-0.006	0.66	0.101	-0.523	0.679	0.603	-0.164	0.406	-0.178	0.006
HMDB00965	Hypotaurine	C2H7NO2S		-0.0305	-0.0585	-0.0515	0.0935	-0.0075	-0.0715	0.1035	0.1295	-0.0275	0.1285	0.0465	0.0075
HMDB00192	Cystine	C6H12N2O4S2		0.1365	-0.3825	-0.1905	0.2545	-0.0615	-0.0345	0.2705	0.1285	0.0775	0.0345	-0.1695	-0.1045
HMDB01173	5-Methylthioadenosine	C11H15N5O3S		-0.177	-0.108	0.01	0.001	0.003	-0.001	0.079	-0.083	0.05	0.013	-0.076	-0.107
HMDB00699	1-methylnicotinamide	C7H8N2O		-0.111	-0.014	-0.018	0.081	-0.035	-0.041	0.076	0.044	0.05	0.049	-0.079	0.014
HMDB00295	UDP	C9H14N2O12P2		-0.0645	0.0115	0.1605	0.0375	-0.0815	-0.0115	0.1635	-0.0755	-0.1395	-0.0255	0.1845	0.0665
HMDB00159	L-phenylalanine	C9H11NO2		-0.029	0	0.015	0.009	0	0.024	-0.024	-0.05	0.019	0	-0.002	-0.042
HMDB00172	L-isoleucine/L-leucine	C6H13NO2		-0.0455	-0.0005	0.0005	0.0525	0.0145	0.0375	-0.0105	-0.0265	0.0205	-0.0065	0.0125	-0.0605
NA	fructosyllysine	C12H24N2O7		-0.1085	-0.1175	0.3095	-0.1795	0.3065	0.3365	0.0135	0.1035	0.2575	-0.0135	-0.0885	-0.1065
HMDB02231	Eicosenoic acid	C20H38O2		-0.0685	-0.1905	-0.0005	0.0205	0.2645	0.1195	-0.1675	-0.0595	0.1365	0.0005	-0.0865	0.0435
HMDB00033	carnosine	C9H14N4O3		-0.066	-0.192	0.078	-0.082	0.326	0.399	-0.269	-0.189	0.072	0.067	-0.072	0.066
HMDB00826	pentadecanoate	C15H30O2		0.067	0.012	0.008	-0.031	0.165	0.083	-0.117	-0.015	0.055	-0.063	-0.075	-0.008
HMDB00220	palmitate	C16H32O2		0.014	-0.021	0.109	0.061	0.24	0.162	-0.083	-0.02	0.148	-0.03	-0.082	-0.014
HMDB02259	margarate	C17H34O2		0.083	-0.021	0.135	-0.016	0.248	0.164	-0.118	0.012	0.215	-0.05	-0.096	-0.012
HMDB00827	stearate	C18H36O2		0.098	-0.027	0.203	-0.074	0.144	0.173	-0.177	-0.109	0.202	-0.106	-0.081	0.027
HMDB00257	thiosulfate	H2O3S2		-0.032	-0.168	0.174	-0.067	0.032	0.1	-0.152	-0.093	0.353	0.084	-0.087	0.035
HMDB00273	Thymidine	C10H14N2O5		0.13	-0.105	-0.045	-0.072	0.394	0.086	0.029	0.043	-0.013	-0.036	0.013	-0.097
HMDB00672	Hexadecanedioic acid	C16H30O4		-0.0365	0.0445	-0.1175	0.0625	0.0095	0.0165	-0.0535	-0.0095	-0.1235	0.0245	0.0225	-0.0595
HMDB00624	(R)-2-hydroxy-4-methylpentanoate	C6H12O3		-0.0185	-0.1255	0.0065	0.0345	0.0175	-0.0065	-0.0305	-0.0755	-0.0435	0.0595	0.0755	0.0155
HMDB00883	Valine	C5H11NO2		0.0025	-0.0425	-0.0005	0.0655	0.0045	-0.0275	-0.0495	-0.0075	0.0005	0.0665	0.0255	-0.0155
NA	4alpha-5-epoxy-8alpha-hydroperoxytocopherone/7-8-epoxy-8alpha-hydroperoxytocopherone	C29H50O5		0.0545	-0.2145	-0.3375	0.2415	-0.0225	0.0575	-0.2075	-0.2625	-0.2055	0.2855	0.0515	0.0225
NA	C27H44O3(5)	C27H44O3		0.0245	-0.0025	-0.0815	0.0925	0.0025	0.0815	-0.0205	-0.0765	-0.0395	0.1625	0.0405	-0.0305
HMDB60287	4-hydroperoxy-2-nonenal	C9H16O3		0.004	-0.037	-0.008	0.134	0.047	-0.004	-0.076	-0.1	-0.041	0.108	0.068	0.099
HMDB00182	lysine	C6H14N2O2		-0.026	-0.105	-0.05	0.177	0.091	0.026	-0.089	-0.063	-0.099	0.225	0.161	0.113
NA	C9H8O3(3)	C9H8O3		0.056	-0.009	-0.044	-0.008	0.015	0.008	-0.06	-0.053	-0.054	0.109	0.024	0.014
HMDB00158	L-tyrosine	C9H11NO3		0.0535	0.0105	-0.0325	-0.0075	0.0065	-0.0005	-0.0715	-0.0595	-0.0545	0.0745	0.0175	0.0005
HMDB01870	benzoate	C7H6O2		0.0675	-0.0055	-0.0655	-0.0045	0.0385	0.0045	-0.0285	-0.0345	-0.0395	0.1425	0.0425	0.0325
HMDB01218	coumarin	C9H6O2		0.034	-0.034	-0.064	-0.008	0.026	0.008	-0.027	-0.066	-0.047	0.154	0.028	0.032
HMDB02092	itaconate/Mesaconate	C5H6O4		0.0495	-0.0155	-0.0515	0.0055	-0.0055	0.0135	-0.0375	-0.0725	-0.0795	0.0695	0.0645	0.0425
HMDB06236	phenylacetaldehyde	C8H8O		0.017	-0.042	-0.027	0.016	0.038	-0.024	-0.009	-0.107	-0.099	0.168	0.009	0.095
HMDB00167	L-threonine	C4H9NO3		0.0945	-0.0145	-0.0275	0.1295	0.0745	-0.0005	-0.1425	-0.1405	-0.1205	0.0775	0.0185	0.0005
HMDB00054	bilirubin	C33H36N4O6		-0.011	0.023	-0.09	0.333	0.359	0.31	-0.139	-0.187	-0.079	0.308	0.011	-0.114
HMDB00177	L-histidine	C6H9N3O2		-0.0365	-0.0315	-0.0115	0.0485	0.0745	0.0225	-0.0475	-0.0805	-0.0645	0.0825	0.0205	0.0115
HMDB00696	L-methionine	C5H11NO2S		-0.0365	-0.0375	-0.0055	0.0305	0.0225	0.0375	-0.1175	-0.1405	-0.1055	0.1135	0.0485	0.0055
HMDB00896	Taurodeoxycholic acid/taurochenodeoxycholate	C26H45NO6S		-0.313	0	-0.191	0	0.237	0.288	-0.338	-0.615	-0.246	0.37	0.21	0.098
HMDB00079	5,6-dihydrothymine	C5H8N2O2		-0.1145	-0.0345	-0.2345	0.0805	0.2195	0.2925	-0.2555	-0.2655	-0.1875	0.1915	0.0345	0.0695
HMDB01325	N6N6N6-Trimethyl-L-lysine	C9H20N2O2		-0.001	-0.038	-0.046	0.001	0.003	0.023	0.007	-0.05	-0.038	0.02	0.007	-0.001
HMDB00133	guanosine	C10H13N5O5		0.019	-0.135	-0.087	0.115	0.085	0.113	0	-0.103	0.01	0	-0.027	-0.022
HMDB01548	ribose-phosphate	C5H11O8P		-0.005	-0.075	0.006	0.056	0.083	0.082	-0.061	-0.103	-0.015	0.005	0.043	-0.005
HMDB00250	Diphosphate	H4O7P2		-0.0515	-0.1145	-0.0135	0.0135	0.0735	0.0485	-0.0115	0.0255	0.0245	-0.0225	0.0115	-0.0305
HMDB00157	Hypoxanthine	C5H4N4O		-0.0385	-0.1345	-0.0235	0.0875	0.0225	0.0525	-0.0145	0.0115	-0.0455	0.0065	0.0195	-0.0065
HMDB03976	D-Glucuronate 1-phosphate	C6H11O10P		-0.103	-0.221	0.018	0.173	0.095	0.14	-0.024	-0.018	-0.141	0.052	0.21	-0.056
HMDB01409	dUMP	C9H13N2O8P		-0.081	-0.161	-0.106	0.025	0.118	0.06	-0.025	0.075	-0.108	0.048	0.073	-0.116
HMDB06294	omega hydroxy hexadecanoate (n-C16:0)	C16H32O3		-0.073	-0.096	-0.009	-0.013	0.097	0.076	-0.104	0.09	0.051	0.009	-0.058	0.03
NA	C27H44O2(5)	C27H44O2		-0.1	-0.196	-0.062	0.219	0.241	0.232	-0.337	0.047	0.021	0.283	-0.021	-0.029
HMDB01546	CDP	C9H15N3O11P2		-0.0615	-0.0115	0.2705	0.0115	0.0125	0.0575	-0.0265	-0.2645	-0.1135	0.0575	0.1275	-0.0605
HMDB00491	3-methyl-2-oxopentanoate/4-methyl-2-oxopentanoate(ketoleucine)	C6H10O3		0.116	-0.083	0.314	0.012	-0.053	0.078	-0.232	-0.283	-0.131	0.206	0.042	-0.012
HMDB01014	4-Imidazolone-5-propanoate	C6H8N2O3		0.017	-0.01	0.01	-0.168	0.018	-0.096	-0.155	-0.266	0.01	0.04	0.015	-0.064
