# Supplementary material for: Integrated Metabolic Profiling and Gene Expression Analysis Reveals Therapeutic Modalities in Breast Cancer
Source: Research Square preprint supplement (doi:10.21203/rs.3.rs-117384/v1), 2020-12-09
Supplement: Supplementary file 9 [file aec0d3f2779fbd2684af99bd.xlsx]

## Sheet: Table S3
Supplementary Table 3. Transformed metabolomics data of breast cell lines grown in vivo and in vitro.
			Inject Name	II_MCF7_1	II_MCF7_2	II_MCF7_3	II_T47D_1	II_T47D_2	II_T47D_3	II_MDAMB231_1	II_MDAMB231_2	II_MDAMB231_3	II_MDAMB468_1	II_MDAMB468_2	II_MDAMB468_3	II_5ulT47D_1	II_5ulT47D_2	II_5ulMCF7_1	II_5ulMCF7_2	II_5ulMDAMB231_1	II_5ulMDAMB231_2	II_5ulMDAMB468_1	II_5ulMDAMB468_2
			Sample Name	MCF-1	MCF-2	MCF-3	T47D-1	T47D-2	T47D-3	MDA-MB-231-1	MDA-MB-231-2	MDA-MB-231-3	MDA-MB-468-1	MDA-MB-468-2	MDA-MB-468-3	T47D-1	T47D-2	MCF-1	MCF-2	MDA-MB-231-1	MDA-MB-231-2	MDA-MB-468-1	MDA-MB-468-2
			Growth Condition	in vivo	in vivo	in vivo	in vivo	in vivo	in vivo	in vivo	in vivo	in vivo	in vivo	in vivo	in vivo	in vitro	in vitro	in vitro	in vitro	in vitro	in vitro	in vitro	in vitro
HMDB	Metabolite	Chemical Formaula
HMDB00034	adenine	C5H5N5		-0.235	-0.151	-0.136	0.354	0.201	0.239	-0.321	-0.042	0.033	-0.541	-0.453	-0.578	-0.703	-0.631	-0.354	-0.581	-0.589	-0.444	-0.71	-0.648
HMDB00257	thiosulfate	H2O3S2		0.1095	-0.1865	-0.5605	0.4515	0.6005	0.3585	-0.7825	-0.9765	-0.6765	-0.5335	-0.4075	-0.3065	-0.2715	-0.2555	-0.0945	-0.0045	0.1885	0.1475	-0.3605	-0.3525
HMDB00694	2-Hydroxyglutarate	C5H8O5		-0.54	-0.551	-0.561	-0.228	-0.209	-0.21	-0.08	-0.132	-0.117	0.378	0.363	0.383	0.24	0.203	-0.543	-0.561	-0.198	-0.215	0.273	0.238
HMDB02092	Mesaconate	C5H6O4		-0.381	-0.401	-0.412	-0.277	-0.267	-0.268	-0.11	-0.165	-0.201	0.1	0.097	0.125	0.194	0.169	0.012	0.026	0.038	0.012	0.31	0.27
HMDB00684	L-kynurenine/Formyl-5-hydroxykynurenamine	C10H12N2O3		-0.138	-0.391	-0.288	-0.649	-0.569	-0.515	-0.105	-0.275	0.276	0.057	0.033	0.059	-0.362	-0.323	-0.187	-0.227	-0.021	-0.077	-0.489	-0.499
HMDB00763	5-Hydroxyindoleacetate	C10H9NO3		-0.069	-0.364	-0.2	-0.643	-0.531	-0.508	-0.052	-0.276	0.349	0.089	0.07	0.085	-0.344	-0.268	-0.176	-0.167	0.04	-0.014	-0.475	-0.442
HMDB01201	GDP	C10H15N5O11P2		-0.1295	-0.0795	-0.0605	0.1275	0.1145	0.0365	0.0975	-0.1145	0.0365	-0.2875	-0.1645	-0.0975	-0.1455	-0.1075	-0.7275	-0.4635	-0.1165	-0.3815	0.0095	-0.0135
HMDB00286	UDP-D-glucose/UDP-D-galactose	C15H24N2O17P2		0.29	0.389	0.347	0.197	0.211	0.207	0.32	0.215	0.099	0.303	0.369	0.348	0.187	0.15	0.22	0.205	0.316	0.323	0.521	0.506
HMDB00935	UDP-D-glucuronate	C15H22N2O18P2		-0.045	0.13	0.136	0.416	0.485	0.407	0.172	-0.151	-0.141	-0.135	0.013	0.147	0.589	0.576	0.812	0.873	0.436	0.425	0.757	0.718
HMDB01546	CDP	C9H15N3O11P2		-0.1635	-0.1725	-0.1445	-0.0005	0.0285	-0.0455	0.1625	0.0195	0.1655	0.1235	0.2585	0.2705	-0.0385	0.0155	-0.2755	-0.2245	0.2515	0.0745	0.4045	0.4055
HMDB00295	UDP	C9H14N2O12P2		0.0795	0.1875	0.1955	0.3085	0.2765	0.2305	0.3755	0.1265	0.2135	0.1645	0.2095	0.2725	-0.0075	-0.0255	0.0605	0.0805	0.0055	-0.0705	0.2305	0.2015
HMDB01341	ADP	C10H15N5O10P2		0.0665	0.1855	0.1675	0.3225	0.2845	0.2515	0.3705	0.1605	0.1275	0.1795	0.2335	0.2625	0.0105	-0.0075	-0.3355	-0.3025	-0.0375	-0.2305	0.1565	0.1095
HMDB01163	GDP-D-mannose	C16H25N5O16P2		0.096	0.227	0.156	0.113	0.119	0.095	-0.228	-0.36	-0.358	-0.243	-0.163	-0.118	0.021	0.044	0.022	0	0.123	0.086	0.013	-0.004
HMDB01018	UDP-alpha-D-xylose	C14H22N2O16P2		0.465	0.581	0.541	0.162	0.196	0.203	0.041	-0.011	-0.066	-0.108	-0.001	-0.043	-0.014	0.002	0.012	0.004	0.001	0.064	-0.056	0.006
HMDB06369	ADP-mannose/GDP-L-fucose/ADP alpha-D-glucoside	C16H25N5O15P2		-0.0025	0.1515	0.0605	0.0175	0.0775	0.0195	-0.0035	-0.1775	-0.1015	-0.0745	-0.0105	0.0025	0.3335	0.3595	0.0125	0.0175	0.1545	0.1105	0.4455	0.4145
HMDB01553	2-keto-4-methylthiobutyrate	C5H8O3S														-0.0115	0.1405	-0.3385	-0.7565	-0.0635	0.1495	0.2445	0.2955
HMDB00214	Ornithine	C5H12N2O2		-0.085	-0.131	-0.122	0.292	0.253	0.272	0.055	0.224	0.005	0.127	0.163	0.104	0.468	0.455	-0.101	-0.095	0.16	0.183	0.414	0.438
HMDB00026	Ureidopropionic acid/Glycyl-glycine	C4H8N2O3		0.0785	0.0895	0.1035	0.0325	0.0035	0.0185	-0.0825	-0.0255	-0.1505	-0.0235	-0.0275	0.0095	0.4695	0.4415	-0.8365	-0.8645	-0.6465	-0.6615	0.5195	0.5095
HMDB00168	L-asparagine	C4H8N2O3		0.076	0.088	0.101	0.031	0.002	0.015	-0.084	-0.026	-0.152	-0.025	-0.029	0.007	0.47	0.441	-0.839	-0.868	-0.646	-0.661	0.52	0.51
HMDB00250	Diphosphate	H4O7P2		0.136	0.113	0.122	0.255	0.231	0.261	0.201	0.206	0.267	-0.092	0.037	0.037	0.416	0.381	-0.923	-0.907	-1.022	-0.972	0.203	0.181
HMDB01248	Flavin adenine dinucleotide oxidized	C27H33N9O15P2		-0.367	-0.375	-0.361	-0.391	-0.026	-0.451	-0.308	-0.478	-0.479	-0.684	-0.833	-0.67	0.067	0.094	0.119	0.13	0.224	0.107	0.311	0.308
HMDB29738	methyl indole-3-acetate	C11H11NO2		-0.0945	-0.1215	-0.0925	-0.2505	-0.1525	-0.1405	-0.2025	-0.1655	-0.2345	-0.3065	-0.3845	-0.3015	0.0745	0.1335	0.5495	0.5135	0.5965	0.6035	0.1115	0.1475
HMDB13333	3-hydroxyhexadecenoylcarnitine	C23H43NO5		-0.3175	-0.3925	-0.7355	-0.2955	-0.8865	-0.4155	-0.7255	-0.7985	0.0465	-0.3125	-0.9865	-1.2135	0.0075	0.1295	-0.0265	-0.0505	0.2565	0.1175	0.0215	0.0485
HMDB29751	naphthalene	C10H8		-0.2665	-0.2475	-0.3005	-0.2365	-0.2115	-0.3455	-0.2865	-0.1935	0.0215	-0.4875	-0.4045	-0.5695	0.3115	0.4385	0.1945	0.1405	0.3685	0.3335	0.2345	0.2855
HMDB00721	Glycylproline/L-Prolinylglycine	C7H12N2O3		-0.068	0.012	-0.022	-0.189	-0.22	-0.215	-0.167	-0.133	-0.198	-0.29	-0.188	-0.255	-0.298	-0.251	0.054	0.028	0.013	0.016	0.102	0.195
HMDB06471	Methylisocitric acid/2-methylcitrate	C7H10O7		-0.2265	-0.1855	-0.2015	-0.1965	-0.1605	-0.1825	-0.5705	-0.5835	-0.5175	-0.4935	-0.3895	-0.3555	-0.0375	-0.0025	0.1125	0.0825	0.0855	0.0955	-0.0295	-0.0555
HMDB00072	cis-aconitate	C6H6O6		-0.273	-0.332	-0.332	-0.189	-0.126	-0.152	-0.106	-0.117	-0.197	-0.148	-0.037	-0.03	0.112	0.142	0.067	0.084	0.118	0.104	0.229	0.24
HMDB01422	3-Hydroxy-N6N6N6-trimethyl-L-lysine	C9H20N2O3		-0.002	-0.015	0.02	-0.326	-0.333	-0.319	-0.253	-0.251	-0.427	0.014	0.085	0.057	-0.249	-0.197	-0.228	-0.214	-0.151	-0.198	0.228	0.24
HMDB06488	2-acetamido-5-oxopentanoate	C7H11NO4		-0.1405	0.1185	0.1225	-0.7525	-0.5085	-0.6745	0.0225	-0.2855	-0.3345	-0.6925	-0.8595	-0.6735	-0.0635	-0.1005	0.0015	0.0165	0.1775	0.1515	0.1785	0.0515
HMDB28848	Glycyl-phenylalanine	C11H14N2O3		0.304	0.321	0.346	-0.048	-0.058	0.001	-0.118	-0.049	0.045	-0.286	-0.211	-0.068	-0.602	-0.161	0.14	-0.006	-0.033	0.107	-0.019	0.113
HMDB00252	sphingosine/(2S)-1-hydroxy-3-oxooctadecan-2-aminium	C18H37NO2		0.0235	0.0425	-0.0335	-0.1575	-0.2575	-0.2165	-0.1985	0.0185	-0.2815	0.0435	-0.1805	-0.2465	-0.2625	-0.1695	-0.3555	-0.4125	0.2275	0.1405	-0.0855	0.0555
HMDB00192	Cystine	C6H12N2O4S2		-0.586	-0.617	-1.515	0.107	0.043	-0.042	0.244	0.001	-1.674	0.22	-0.001	0.191
HMDB02231	Eicosenoic acid	C20H38O2		-0.2775	-0.4005	-0.4835	-0.1655	-0.1055	-0.2245	-0.1675	-0.4355	0.2885	-0.6825	-0.7265	-0.9965	0.0085	0.0105	-0.1265	-0.1865	0.0475	0.0325	-0.0995	-0.0525
HMDB04701	9(10)-EpOME/12(13)-EpOME	C18H32O3		-0.091	-0.381	-0.286	-0.294	-0.087	-0.212	0.07	-0.02	0.453	-0.135	-0.1	-0.132	-0.019	0.016	-0.201	-0.187	0.078	0.051	-0.067	-0.063
HMDB00827	stearate	C18H36O2		-0.223	-0.202	-0.384	-0.092	-0.143	-0.137	-0.062	-0.065	0.125	-0.126	-0.118	-0.268	0.49	0.432	0.017	0.084	0.19	0.015	0.491	0.59
HMDB00220	palmitate	C16H32O2		-0.168	-0.19	-0.417	-0.059	-0.114	-0.085	-0.039	-0.077	0.266	-0.135	-0.121	-0.283	0.689	0.63	0.352	0.425	0.448	0.358	0.658	0.667
HMDB06294	omega hydroxy hexadecanoate (n-C16:0)	C16H32O3		-0.3435	-0.3845	-0.4885	-0.1105	-0.1485	-0.1915	-0.2505	-0.1905	0.0255	-0.3375	-0.3855	-0.5475	0.5335	0.5465	0.3775	0.3475	0.4585	0.4885	0.4605	0.4755
HMDB02259	margarate	C17H34O2		-0.4965	-0.5095	-0.6905	-0.2525	-0.3035	-0.3315	-0.4145	-0.4285	-0.0775	-0.5345	-0.5695	-0.7755	0.4105	0.4085	0.2185	0.2005	0.3925	0.3765	0.3725	0.4005
HMDB00806	myristate	C14H28O2		-0.1405	-0.1175	-0.2255	-0.0005	-0.0335	-0.0065	0.0655	0.0865	0.1405	0.1365	0.1705	0.1115	0.1695	0.1505	-0.0475	0.0125	0.0645	0.0405	0.1055	0.0575
HMDB06009	isoputreanine/putreanine	C7H16N2O2		-0.052	-0.082	-0.089	-0.121	-0.141	-0.096	-0.177	-0.102	-0.237	-0.288	-0.191	-0.212	0.508	0.51	0.113	0.146	0.337	0.361	0.067	0.086
HMDB00020	4-Hydroxyphenylacetate/2-Hydroxyphenylacetate/3,4-Dihydroxyphenylacetaldehyde	C8H8O3		-0.4115	-0.3425	-0.5135	-0.3395	-0.4595	-0.3985	-0.4565	-0.3745	-0.1305	-0.5065	-0.5235	-0.5945	0.2465	0.2585	0.0995	0.0915	0.3185	0.3415	0.1905	0.1985
HMDB00784	Azelaic acid	C9H16O4		-0.045	-0.084	-0.154	-0.161	-0.059	-0.128	-0.364	-0.272	-0.131	0.107	0.305	-0.012	-0.042	0.022	-0.345	-0.332	0.1	-0.039	-0.121	-0.107
HMDB05045	15(S)-Hydroxyeicosatrienoic acid	C20H34O3		-0.607	-0.801	-0.636	-0.095	0.005	-0.099	-0.105	-0.024	-0.021	-0.247	-0.358	-0.241
HMDB01178	ADP-ribose	C15H23N5O14P2		-0.491	-0.74	-0.618	-0.741	-0.799	-0.987	0.129	0.114	0.61	-0.378	-0.286	-0.594	-0.612	-0.658	-0.65	-0.489	-0.33	-0.525	-0.603	-0.415
HMDB06535	beta-1-4-mannose-N-acetylglucosamine	C14H25NO11		-0.749	-0.889	-0.807	-2.397	-2.372	-1.193	-0.019	0.077	-0.059	0.035	0.024	-0.043	-2.216	-1.202	-2.291	-2.424	0.389	0.139	0.033	0.036
HMDB00211	myo-inositol	C6H12O6		-0.276	-0.331	-0.294	-0.239	-0.3	-0.236	0.118	0.072	-0.011	-0.026	-0.038	0.011	-0.223	-0.26	-0.341	-0.355	0.109	0.12	-0.161	-0.172
HMDB05175	(4-hydroxy-3-methoxyphenyl)acetaldehyde	C9H10O3		-0.4625	-0.4935	-0.2795	-0.2885	-0.3245	-0.3675	-0.3655	-0.2615	-0.2935	-0.2935	-0.2225	-0.2585	-0.1665	-0.1305	0.2165	0.2165	-0.0645	-0.0675	0.0385	0.0555
HMDB01385	3-Keto-beta-D-galactose/L-Gulonolactone	C6H10O6		-0.4615	-0.5045	-0.4585	-0.4885	-0.4465	-0.4905	-0.1345	-0.1745	-0.1195	-0.4015	-0.4285	-0.3765	-0.2225	-0.1585	-0.0455	-0.0455	0.1635	0.1335	-0.1445	-0.1145
HMDB06334	3-dehydro-L-gulonate/D-glucuronate/L-iduronate	C6H10O7		-0.4705	-0.4925	-0.4805	-0.7355	-0.7175	-0.6555	0.0005	-0.0425	0.0395	-0.6025	-0.5075	-0.4915	-0.2415	-0.2285	0.0205	0.0395	-0.0025	-0.0005	-0.1545	-0.1685
HMDB60256	L-xylonate/L-lyxonate	C5H10O6		-0.159	-0.107	-0.145	-0.104	-0.164	-0.113	-0.335	-0.296	-0.264	-0.316	-0.303	-0.273	-0.143	-0.118	-0.017	-0.004	-0.058	-0.052	-0.173	-0.18
HMDB04096	5-Methoxyindoleacetate	C11H11NO3		-0.284	-0.373	-0.198	-0.2	-0.235	-0.257	-0.258	-0.143	-0.299	-0.079	-0.026	-0.084	0.009	-0.032	0.076	0.04	0.032	0.09	-0.005	-0.04
HMDB00033	carnosine	C9H14N4O3		-0.7185	-0.8595	-0.6185	-0.0895	-0.2515	-0.1135	-0.6235	-0.3915	-0.1765	-0.4815	-0.4795	-0.3685	0.2375	0.2605	0.0085	0.0105	0.2345	0.2425	0.4345	0.4505
HMDB00094	citrate/isocitrate	C6H8O7		-0.209	-0.231	-0.235	-0.068	-0.045	-0.038	0.031	0.039	-0.105	0.121	0.2	0.222	0.067	0.046	-0.049	0.009	-0.006	-0.001	0.152	0.157
HMDB00097	choline	C5H13NO		-0.0985	-0.1125	-0.0665	0.0295	0.0275	0.0455	0.0855	0.1285	-0.0585	0.0655	0.0955	0.1145
HMDB00174/ HMDB00174	L-fucose/L-Fuculose															0.318	0.33	0.092	0.102	0.434	0.44	0.386	0.376
HMDB00017	4-pyridoxate	C8H9NO4		0.274	0.215	0.402	-0.067	-0.026	-0.03	-0.352	-0.26	0.044	-0.301	-0.278	-0.263	0.402	0.403	0.295	0.243	0.36	0.434	0.418	0.392
HMDB02820	Methylimidazoleacetic acid	C6H8N2O2		-0.207	-0.255	-0.295	0.003	0.072	0.022	-0.456	-0.482	-0.435	-0.042	-0.046	-0.025	0.536	0.475	0.443	0.413	0.31	0.318	0.48	0.466
HMDB12884	adrenochrome/N-benzoylglycinate	C9H9NO3		-0.4375	-0.4935	-0.3745	-0.5005	-0.5255	-0.5335	-0.6935	-0.5585	-0.6925	-0.2905	-0.2345	-0.2855	0.1995	0.1835	-0.0965	-0.1215	0.0305	0.0625	0.1635	0.1705
HMDB00896	Taurodeoxycholic acid/taurochenodeoxycholate	C26H45NO6S		-0.777	-1.016	-0.536	-0.139	-0.089	-0.202	-1.199	-0.545	-2.497	-0.526	-0.41	-0.465	0.861	0.814	0.741	0.703	0.92	0.915	0.824	0.781
HMDB00217	NADP+	C21H28N7O17P3		-1.0575	-0.9625	-0.2835	-0.3795	-0.0895	-0.4785	-0.0695	-0.3565	-0.2565	-0.8535	-0.3695	-0.3365	0.3825	0.4185	0.1655	0.2485	0.6125	0.6105	0.5445	0.5825
HMDB00623	Dodecanedioic acid	C12H22O4		-0.107	-0.184	-0.294	-0.09	-0.104	-0.095	-0.164	-0.105	0.134	-0.11	-0.089	-0.201	0.695	0.702	0.572	0.517	0.728	0.749	0.706	0.702
HMDB04362	4-hydroxy-2-nonenal/3,4-epoxynoal	C9H16O2		0.4625	0.4685	0.2635	0.5435	0.4695	0.4655	0.5365	0.6085	0.8955	0.5355	0.4805	0.2675	1.5525	1.5415	1.4405	1.3985	1.5505	1.5985	1.5005	1.5065
HMDB00209	phenylacetate/(4-hydroxyphenyl)acetaldehyde	C8H8O2		0.436	0.467	0.203	0.511	0.421	0.467	0.41	0.513	0.912	0.576	0.463	0.212	1.206	1.18	1.064	1.058	1.177	1.207	1.149	1.143
HMDB00847	nooate	C9H18O2		-0.161	-0.176	-0.369	-0.106	-0.19	-0.13	0.038	0.096	0.271	0.011	-0.023	-0.276	0.792	0.755	0.677	0.655	0.785	0.841	0.728	0.74
HMDB00511	caprate	C10H20O2		-0.166	-0.13	-0.225	0.033	-0.027	-0.023	-0.016	0.075	0.166	-0.008	-0.016	-0.178	0.692	0.673	0.557	0.531	0.667	0.709	0.606	0.616
HMDB03647	perillyl aldehyde	C10H14O		0.108	0.083	-0.132	0.171	0.022	0.073	0.01	0.068	0.392	0.081	0.016	-0.13	0.829	0.835	0.812	0.775	0.909	0.931	0.82	0.795
HMDB03375	limonene/(+)-alpha-pinene	C10H16		0.134	0.094	-0.074	0.184	0.082	0.088	0.009	0.111	0.413	0.034	-0.023	-0.159	0.853	0.887	0.794	0.775	0.92	0.921	0.862	0.853
HMDB12535	12S-HHT	C17H28O3		0.115	0.089	-0.113	0.151	0.075	0.047	-0.055	0.058	0.385	0.004	-0.055	-0.213	0.971	1.018	0.911	0.873	1.034	1.022	0.988	0.991
HMDB12515	11'-Carboxy-alpha-chromanol	C16H22O4		-0.2415	-0.2325	-0.2785	0.2035	-0.2695	-0.3845	-0.4595	-0.2975	-0.0205	-0.2455	-0.3085	-0.4985	1.0505	1.0985	1.0055	0.9715	1.2185	1.2065	1.0945	1.0825
HMDB00801	phytanic acid/arachidic acid	C20H40O2		-0.4525	-0.4425	-0.6495	-0.3225	-0.3795	-0.4085	-0.3425	-0.3655	0.0385	-0.4575	-0.5615	-0.7695	0.6505	0.6615	0.3635	0.2875	0.6735	0.6745	0.5415	0.5795
HMDB00826	pentadecanoate	C15H30O2		-0.182	-0.158	-0.374	0.006	-0.05	-0.064	-0.14	-0.094	0.276	-0.131	-0.194	-0.442	0.892	0.87	0.737	0.734	0.86	0.902	0.846	0.84
HMDB00795	pristanic acid	C19H38O2		-0.0635	-0.0865	-0.3435	0.0475	-0.0195	-0.0175	-0.0335	-0.0405	0.3795	-0.1085	-0.2605	-0.5995	1.0495	1.0405	0.9355	0.9235	1.1125	1.1135	1.0025	1.0465
HMDB04704	9,10-hydroxyoctadec-12(Z)-enoate/12,13-hydroxyoctadec-9(Z)-enoate	C18H34O4		-0.14	-0.164	-0.333	-0.128	-0.147	-0.154	-0.067	-0.03	0.292	-0.148	-0.093	-0.36	0.85	0.912	0.701	0.648	0.801	0.835	0.768	0.78
HMDB00638	laurate	C12H24O2		-0.158	-0.159	-0.253	-0.029	-0.05	-0.065	-0.076	-0.002	0.18	0.087	-0.032	-0.105	0.745	0.712	0.59	0.588	0.701	0.751	0.667	0.658
HMDB00672	Hexadecanedioic acid	C16H30O4		-0.222	-0.223	-0.367	-0.027	-0.07	-0.07	-0.066	-0.012	0.131	-0.24	-0.277	-0.382	0.745	0.762	0.563	0.552	0.696	0.729	0.626	0.664
HMDB60287	4-hydroperoxy-2-nonenal	C9H16O3		-0.1515	-0.1635	-0.2845	-0.1395	-0.1475	-0.0955	0.0265	-0.0195	0.1855	0.0305	0.0175	-0.1895	0.3825	0.3925	0.2495	0.2205	0.4475	0.4485	0.3345	0.3425
HMDB02203	w-hydroxydecanoicacid	C10H20O3		-0.2785	-0.2915	-0.2515	0.3015	0.2485	0.2355	-0.2055	-0.1125	-0.0975	-0.1735	-0.1295	-0.1475	0.2475	0.2485	0.0815	0.0785	0.2375	0.2445	0.1305	0.1625
HMDB00517	arginine	C6H14N4O2		0.1255	0.1195	0.2035	-0.2345	-0.2555	-0.2085	-0.2615	-0.1995	-0.2155	-0.5925	-0.5415	-0.3125	0.8585	0.8105	0.4155	0.4145	0.4365	0.4915	0.7385	0.7405
HMDB01000	dUDP	C9H14N2O11P2		-0.635	-0.6	-0.384	-0.158	-0.174	-0.229	-0.24	-0.229	-0.488	0.071	0.22	0.279	0.192	0.224	0.389	0.369	0.486	0.498	0.144	0.206
HMDB00807	D-Glycerate 3-phosphate/D-Glycerate 2-phosphate	C3H7O7P		-0.36	-0.318	-0.3	-0.182	-0.127	-0.109	-0.296	-0.248	-0.154	-0.12	-0.039	0.042	-0.005	-0.025	0.544	0.523	0.083	0.125	0.413	0.466
HMDB01316	6-Phosphogluconic acid	C6H13O10P		-0.0535	0.0385	0.1105	-0.2535	-0.2135	-0.2335	-0.2565	-0.2765	-0.2245	0.1905	0.2365	0.4295	-0.0405	0.0315	0.9575	1.0135	0.4755	0.4795	0.8275	0.8505
HMDB00902	NAD+	C21H27N7O14P2		-0.417	-0.399	-0.347	-0.299	-0.304	-0.271	0.136	0.08	-0.042	0.053	0.03	0.046	0.019	0.035	0.15	0.131	0.302	0.328	0.193	0.212
HMDB00285	UTP	C9H15N2O15P3		-0.339	-0.211	-0.25	0.096	0.04	-0.025	0.305	-0.128	-0.191	0.144	0.043	0.318	0.643	0.658	-0.14	-0.012	1.077	0.715	1.141	1.045
HMDB00538	ATP	C10H16N5O13P3		-0.135	-0.088	-0.083	0.176	0.167	0.126	0.286	-0.057	-0.189	0.185	0.122	0.416	0.519	0.542	-0.033	0.103	0.693	0.404	0.757	0.694
HMDB00082	CTP	C9H16N3O14P3		-2.3555	-0.9885	-0.9085	-0.3495	-0.2025	-0.2465	0.2805	-0.1905	-0.3005	0.2755	0.1415	0.4295	0.7185	0.8135	-0.5695	-0.3255	1.5045	0.9895	1.5695	1.4495
HMDB01273	GTP	C10H16N5O14P3		-0.5585	-0.6935	-0.3985	0.0155	-0.1175	-0.1525	-0.0315	-0.3505	-0.3165	-0.1935	-0.3135	0.1205	0.2255	0.4225	-2.4295	-0.8715	0.9535	0.3425	0.7245	0.4825
HMDB06236	phenylacetaldehyde	C8H8O		0.0375	0.0775	0.0945	-0.1625	-0.1115	-0.1295	-0.2685	-0.2045	-0.2755	-0.1925	-0.1905	-0.1575	0.1345	0.2105	0.6375	0.6205	0.6945	0.7095	0.2425	0.2615
HMDB01218	coumarin	C9H6O2		0.056	0.078	0.09	-0.114	-0.081	-0.112	-0.185	-0.162	-0.269	-0.075	-0.054	-0.039	0.133	0.157	0.592	0.597	0.605	0.647	0.199	0.208
HMDB01870	benzoate	C7H6O2		0.0845	0.1095	0.1255	-0.0755	-0.0615	-0.0975	-0.1505	-0.1325	-0.2245	-0.0325	0.0015	0.0075	0.1665	0.1645	0.6155	0.6215	0.6205	0.6625	0.2295	0.2255
HMDB00491	3-methyl-2-oxopentanoate/4-methyl-2-oxopentanoate(ketoleucine)	C6H10O3		-0.8265	-0.7685	-0.7905	-0.7885	-0.8115	-0.8125	-0.6215	-0.4675	-0.5525	-0.1235	0.0095	-0.1035	0.2915	0.2195	0.8845	0.9045	0.5395	0.6045	0.8505	0.8245
HMDB00019	3-methyl-2-oxobutanoate	C5H8O3		-0.2515	-0.2665	-0.4125	-0.1975	-0.2855	-0.2325	-0.0045	-0.1755	-0.0195	-0.2495	-0.2895	-0.2845	0.3495	0.2935	1.0505	1.0465	0.7505	0.7735	0.7815	0.7665
HMDB03501	trans-caffeate/3-(4-hydroxyphenyl)pyruvate	C9H8O4		-0.795	-0.81	-0.814	-0.524	-0.556	-0.725	-0.636	-0.489	-0.265	-0.781	-0.725	-0.79	0.741	0.729	0.869	0.878	0.823	0.794	0.722	0.699
HMDB03345	alpha-D-glucose	C6H12O6		-0.609	-0.567	-0.577	-1.037	-1.086	-1.027	-1.221	-1.147	-0.968	-0.912	-0.872	-0.72	0.384	0.349	0.514	0.546	0.617	0.678	0.306	0.294
HMDB06293	L-erythrulose	C4H8O4		-1.2345	-1.2705	-1.1625	-1.1675	-1.2705	-1.2245	-1.2275	-1.1705	-1.0025	-0.9225	-0.9425	-0.7565	0.4465	0.4325	0.5885	0.5925	0.7375	0.7735	0.3985	0.3865
HMDB02266	2-methylglutaconic acid	C6H8O4		-1.326	-1.43	-1.494	-2.223	-2.279	-2.131	-1.474	-1.312	-1.042	-0.997	-0.962	-0.808	0.429	0.418	0.549	0.566	0.7	0.737	0.346	0.333
HMDB00208	2-oxoglutarate(2-)	C5H6O5		-1.008	-1.016	-1.242	-1	-1.053	-0.992	-0.864	-0.936	-0.852	-0.979	-1.014	-1.032	0.802	0.781	0.697	0.725	0.521	0.483	1.08	1.103
HMDB00243	pyruvate	C3H4O3		-0.6335	-0.5745	-0.6175	-0.6295	-0.6115	-0.5725	-0.5065	-0.5515	-0.3785	-0.6075	-0.6365	-0.6035	0.8705	0.8465	1.2835	1.3645	1.1675	1.2325	0.9375	0.9755
HMDB00263	Phosphoenolpyruvate	C3H5O6P		-0.6945	-0.5875	-0.6365	-0.3865	-0.2135	-0.2345	-0.5525	-0.7065	-0.5295	-0.2865	-0.1925	-0.0825	0.3235	0.3005	0.7715	0.7705	0.4455	0.4655	0.6945	0.7095
HMDB00641	L-glutamine	C5H10N2O3		-0.115	-0.072	-0.058	-0.163	-0.178	-0.146	-0.21	-0.155	-0.224	-0.13	-0.111	-0.109	0.167	0.1	0.306	0.355	0.254	0.321	0.305	0.284
HMDB02031	3-Ureidoisobutyrate/Glycylsarcosine	C5H10N2O3		-0.0845	-0.0425	-0.0275	-0.1315	-0.1475	-0.1155	-0.1795	-0.1245	-0.1935	-0.0995	-0.0815	-0.0795	0.1895	0.1225	0.3295	0.3785	0.2745	0.3425	0.3285	0.3085
HMDB59629	(R)-mevalonate	C6H12O4		-0.1835	-0.1635	-0.1395	-0.2945	-0.2785	-0.2975	-0.3765	-0.3215	-0.3085	-0.4405	-0.4125	-0.4325	0.1595	0.1515	0.3275	0.3235	0.3755	0.3835	0.3335	0.3275
HMDB00448	HMDB00448	adipic acid														0.3385	0.3345	0.1535	0.1285	0.4215	0.3915	0.7055	0.7315
HMDB03357	N(2)-acetyl-L-ornithine	C7H14N2O3		-0.256	-0.292	-0.323	-0.245	-0.22	-0.19	-0.131	-0.156	-0.18	-0.419	-0.379	-0.377	0.118	0.134	0.156	0.156	0.347	0.362	0.35	0.396
HMDB42012	(-)-Salsolinol/NN-dimethyldopaminequinone-1	C10H13NO2		0.146	0.165	0.156	0.137	0.081	0.125	-0.064	0.113	0.245	0.301	0.23	0.155	-0.145	-0.13	0.227	0.102	0.239	0.231	0.366	0.368
HMDB00187	L-serine	C3H7NO3		-0.0075	-0.0135	0.0435	-0.0965	-0.1285	-0.1085	-0.2045	-0.1645	-0.1965	0.0975	0.0795	0.1515	0.0745	0.0395	-0.0615	-0.0565	0.1135	0.1405	0.0995	0.0955
HMDB02757	L-cysteate	C3H7NO5S		-0.467	-0.443	-0.607	-0.456	-0.559	-0.522	-0.33	-0.374	-0.528	-0.204	-0.317	-0.259	-0.267	-0.278	0.01	-0.017	0.228	0.186	0.559	0.539
HMDB28691	L-Alanyl-L-leucine	C9H18N2O3		-0.5535	-0.6125	-0.5885	-0.6055	-0.6315	-0.6375	-0.6595	-0.6895	-0.6945	-0.8965	-0.9355	-0.8285	0.5905	0.5985	0.3685	0.3305	0.3305	0.3345	0.2965	0.2745
HMDB00079	5,6-dihydrothymine	C5H8N2O2		-0.8915	-0.8345	-0.8305	-0.9145	-0.8855	-0.8695	-1.0605	-1.0285	-1.0455	-1.0135	-0.9585	-0.9755	0.0025	-0.0025	0.0685	0.0635	-0.0255	-0.0165	-0.1765	-0.1465
HMDB60278	fructoseglycine	C8H15NO7		-1.089	-1.377	-1.678	-1.629	-1.976	-1.566	-0.849	-0.696	-0.679	0.049	-0.073	0.023	0.242	0.093	0.65	0.52	0.573	0.565	0.702	0.651
HMDB01511	N-phosphocreatinate	C4H10N3O5P		-0.838	-0.87	-0.621	-0.086	-0.039	0.023	-0.215	-0.104	-0.366	-0.229	-0.129	-0.076	0.859	0.833	0.631	0.628	-0.023	-0.057	0.193	0.174
HMDB00854	N-Formimidoyl-L-glutamate	C6H10N2O4														-0.214	-0.208	0.417	0.372	0.13	0.059	0.108	0.08
HMDB00653	cholesterol sulfate	C27H46O4S		0.713	0.633	0.404	-0.234	-0.279	-0.447	-0.723	-1.058	-0.399	-0.361	-0.499	-0.571	0.523	0.527	0.418	0.339	-0.044	-0.52	0.621	0.592
HMDB03337	GSSG	C20H32N6O12S2		-0.365	-0.355	-0.454	-0.263	-0.249	-0.219	-0.156	-0.054	0.033	-0.235	-0.216	-0.246	-0.037	-0.01	-0.309	-0.29	0.072	0.107	0.012	0.01
HMDB06248	gama-L-glutamyl-L-alanine/5-L-Glutamyl-L-alanine-1	C8H14N2O5		-0.997	-0.978	-0.843	-1.116	-1.09	-1.1	-1.395	-1.411	-1.5	-1.379	-1.351	-1.296	-0.064	-0.078	0.358	0.366	-0.004	-0.165	0.229	0.209
HMDB00254	succinate(2-)	C4H6O4		-0.725	-0.688	-0.65	-0.723	-0.781	-0.743	-0.569	-0.665	-0.753	-0.718	-0.723	-0.667	0.075	0.07	-0.034	-0.065	-0.035	-0.003	-0.005	-0.026
HMDB02005	Methionine sulfoxide	C5H11NO3S		-0.405	-0.379	-0.397	-0.601	-0.521	-0.568	-0.353	-0.346	-0.351	-0.132	-0.127	-0.099	-0.04	-0.161	-0.28	-0.317	0.017	-0.077	0.156	0.152
HMDB00624	(R)-2-hydroxy-4-methylpentanoate	C6H12O3		-0.5255	-0.5335	-0.3675	-0.3595	-0.3295	-0.3595	-0.3505	-0.3085	-0.3375	-0.0995	-0.0595	-0.0535	-0.0615	-0.0425	-0.1945	-0.1705	-0.0115	-0.0275	0.2335	0.1985
HMDB00500	4-hydroxybenzoate/Gentisate aldehyde	C7H6O3		-0.5635	-0.5365	-0.5735	-0.7885	-0.7855	-0.7835	-0.6515	-0.6965	-0.7905	-0.7715	-0.7395	-0.7385	-0.0885	0.2155	-0.1705	0.1685	0.2315	0.3535	0.2675	0.2765
HMDB00123	glycine	C2H5NO2		-0.2335	-0.1745	-0.2075	-0.0545	-0.0305	-0.0165	-0.1495	-0.1065	-0.1955	0.1785	0.2245	0.1845	-0.4095	-0.0865	-0.1525	-0.1855	-0.2085	-0.2205	0.0345	0.0545
HMDB00244	Riboflavin	C17H20N4O6		0.106	0.085	0.181	0.148	0.104	0.13	-0.079	-0.039	-0.009	-0.033	-0.057	0.005	0.531	0.561	0.625	0.573	0.731	0.704	0.503	0.504
HMDB01325	N6N6N6-Trimethyl-L-lysine	C9H20N2O2		0.097	0.094	0.158	0.009	-0.048	-0.001	-0.007	0.011	-0.02	0.04	0.066	0.073	0.204	0.168	0.137	0.136	0.174	0.202	0.151	0.138
METPA0491	N2-Formyl-N1-(5-phospho-D-ribosyl)glycinamide	C8H15N2O9P		0.1745	0.1855	0.1705	-0.3375	-0.3235	-0.2965	0.4075	0.3445	0.3275	0.3655	0.2855	0.3345	-0.3465	-0.5785	0.7075	0.7045	0.3995	0.2045	0.9085	0.8915
HMDB00965	Hypotaurine	C2H7NO2S		-0.051	-0.066	-0.032	0.244	0.311	0.322	0.238	0.342	0.129	-0.302	-0.268	-0.191	0.756	0.758	0.6	0.589	0.418	0.431	0.109	0.106
HMDB01545	Pyridoxal	C8H9NO3		0.066	0.117	0.104	-0.246	-0.113	-0.068	-0.169	-0.297	0.079	-0.178	0	0	0.372	0.403	0.202	0.012	0.123	0.347	0.688	0.451
HMDB00191	aspartate	C4H7NO4		0.251	0.331	0.321	0.156	0.119	0.163	0.169	0.229	-0.008	-0.119	-0.084	-0.013	-0.036	-0.079	0.172	0.176	0.178	0.209	-0.099	-0.096
HMDB00068	Adrenaline/L-Normetanephrine	C9H13NO3		-0.6685	-0.6905	-0.4445	-0.5905	-0.5735	-0.6415	-0.9325	-0.9155	-0.8435	-0.5475	-0.5645	-0.5025	0.7305	0.7315	0.9135	0.8785	0.9755	0.9725	0.9405	0.9165
HMDB00076	5,6-dihydrouracil/L-3-Cyanoalanine	C4H6N2O2		-0.6065	-0.5885	-0.6675	-0.6875	-0.6475	-0.7435	-0.6515	-0.6235	-0.6295	-0.2375	-0.3115	-0.1765	-0.3285	-0.2755	0.5145	0.5475	0.6655	0.5865	0.4075	0.3055
HMDB00267/HMDB00267	5-oxoproline/L-1-Pyrroline-3-hydroxy-5-carboxylate															0.6345	0.5715	0.6315	0.6335	0.6185	0.7115	0.5775	0.5675
HMDB01473	Dihydroxyacetone phosphate	C3H7O6P		-0.216	-0.113	-0.068	-0.41	-0.32	-0.4	0.105	0.057	0.019	-0.101	0.059	0.09	0.274	0.266	0.271	0.35	0.441	0.434	0.535	0.561
HMDB00159	L-phenylalanine	C9H11NO2		-0.0075	0.0425	0.0635	-0.0045	-0.0145	0.0335	-0.0125	0.0515	-0.1155	0.0435	0.0235	0.0965	0.0085	-0.0405	0.4245	0.4455	0.3255	0.3985	-0.0195	-0.0205
HMDB00696	L-methionine	C5H11NO2S		-0.0015	0.0075	0.0675	-0.0925	-0.0805	-0.0975	-0.1225	-0.0665	-0.1985	-0.0025	0.0015	0.0275	0.0845	0.0495	0.3085	0.3265	0.2575	0.2975	0.0825	0.0835
HMDB00172	L-isoleucine/L-leucine	C6H13NO2		-0.055	0.002	0.034	-0.045	-0.05	-0.009	-0.004	0.05	-0.122	0.008	0.027	0.058	0.186	0.116	0.33	0.366	0.231	0.318	0.06	0.064
HMDB00158	L-tyrosine	C9H11NO3		-0.029	0.001	0.022	-0.145	-0.165	-0.172	-0.222	-0.204	-0.313	-0.071	-0.046	-0.018	0.053	0.027	0.486	0.487	0.437	0.503	0.093	0.082
HMDB00828	N-Carbamoyl-L-aspartate	C5H8N2O5		-0.4765	-0.5935	-0.3865	-0.2535	-0.2145	-0.4295	0.1835	-0.0215	0.0215	0.5895	0.5315	0.6315	0.3375	0.3085	0.4645	0.4895	0.7365	0.7445	0.6525	0.6235
HMDB00167	L-threonine	C4H9NO3		0.09	0.129	0.106	0.033	0.051	0.072	0.067	0.064	-0.027	0.184	0.187	0.173	-0.269	-0.247	0.208	0.264	0.191	0.238	-0.249	-0.206
HMDB00883	Valine	C5H11NO2		-0.127	-0.062	-0.057	-0.102	-0.151	-0.09	-0.041	-0.01	-0.115	-0.058	-0.016	0.036	-0.073	-0.106	0.396	0.412	0.333	0.405	-0.075	-0.084
HMDB60244	Phosphodimethylethanolamine	C4H12NO4P		0.136	0.165	0.145	0.323	0.357	0.358	0.09	-0.022	-0.007	0.059	0.049	0.066	1.388	1.373	0.762	0.768	1.27	1.29	1.139	1.14
HMDB00299	xanthosine	C10H12N4O6		0.4055	0.3565	0.4765	0.4985	0.5305	0.4855	0.0645	0.1885	-0.0395	-0.0045	-0.1045	0.1495	0.7915	0.8555	0.5125	0.4795	0.8675	0.8555	1.0505	1.0725
HMDB06556	L-4-hydroxyglutamate semialdehyde	C5H9NO4		-0.001	0.009	0.025	-0.162	-0.167	-0.141	0.266	0.227	0.102	-0.012	-0.008	0.031	-0.14	-0.184	-0.001	0.049	0	0.04	0.13	0.123
HMDB00148	L-glutamate	C5H9NO4		-0.0035	0.0065	0.0215	-0.1645	-0.1695	-0.1435	0.2605	0.2215	0.0975	-0.0165	-0.0115	0.0265	-0.1395	-0.1835	0.0005	0.0505	-0.0005	0.0405	0.1295	0.1225
HMDB00929	L-tryptophan	C11H12N2O2		0.07	0.115	0.138	0.031	0.028	0.059	0.024	0.05	-0.101	0.001	0	0	-0.052	-0.091	0.293	0.313	0.178	0.248	-0.105	-0.104
HMDB01173	5-Methylthioadenosine	C11H15N5O3S		0.4145	0.3925	0.4195	0.0165	0.0215	0.1285	0.3275	0.3585	0.2455	0.0335	0.0795	0.1425	-0.0615	-0.0445	0.7125	0.7175	0.4075	0.4955	-0.0015	0.0125
HMDB00182	lysine	C6H14N2O2		0.1035	0.0805	0.1715	-0.1425	-0.1465	-0.1215	-0.1565	-0.0795	-0.1935	-0.1635	-0.1105	-0.0725	0.0855	0.0525	0.4205	0.4655	0.4155	0.4775	-0.0385	-0.0295
HMDB01896	5-methoxytryptophol	C11H13NO2		0.2215	0.2555	0.2875	0.2125	0.1905	0.2125	-0.0855	-0.0675	-0.0845	-0.0095	-0.0635	0.0335	0.2295	0.2305	-0.0975	-0.1585	-0.0365	-0.0565	-0.0375	-0.0555
HMDB01138	N-acetyl-L-glutamate	C7H11NO5		-0.0385	-0.0145	0.0365	-0.5555	-0.5105	-0.5075	1.2915	1.1495	1.1465	-0.4025	-0.3765	-0.3145	-0.4195	-0.3585	0.0995	0.0655	1.1495	1.1525	0.1405	0.1405
HMDB60444	beta-D-Fructose 1,6-bisphosphate	C6H14O12P2		0.4345	0.6455	0.6615	0.1295	0.1855	0.1435	-0.0035	0.0465	0.0265	0.2045	0.4335	0.5185	0.3385	0.3605	0.4305	0.4615	0.5605	0.5695	0.8335	0.8795
HMDB60274	sedoheptulose 1,7-bisphosphate	C7H16O13P2		0.2185	0.4355	0.4395	0.2805	0.4265	0.3845	0.0535	0.0575	0.0765	-0.0865	0.1875	0.2705	0.4845	0.5465	0.3295	0.3915	0.5735	0.5225	0.8395	0.9005
HMDB00125	glutathione	C10H17N3O6S		0.3095	0.3465	0.3175	0.2975	0.2805	0.3135	0.3725	0.2935	0.1355	0.3085	0.3025	0.3435	0.0305	-0.0055	0.2125	0.2515	0.0455	0.0575	0.3085	0.3125
HMDB00078	L-cysteinylglycine	C5H10N2O3S		0.462	0.455	0.463	0.408	0.413	0.431	0.477	0.376	0.27	0.29	0.289	0.333	0.149	0.182	0.354	0.362	0.294	0.23	0.482	0.509
HMDB01423	Coenzyme A	C21H36N7O16P3S		0.513	0.455	0.571	0.484	0.526	0.449	0.486	-0.003	0.16	0.111	0.203	0.363	-0.143	-0.011	0.253	0.277	-0.008	-0.178	0.648	0.627
HMDB00156	malate(2-)	C4H6O5		0.01	0.033	0.017	0.07	0.075	0.091	0.11	0.042	-0.033	0.079	0.076	0.109	0.042	-0.016	0.025	0.058	-0.026	0.029	0.118	0.105
HMDB00134	fumarate	C4H4O4		0.0455	0.0635	0.0425	0.0615	0.0765	0.0855	0.0945	0.0265	-0.0245	-0.0015	-0.0145	0.0235	0.0735	0.0425	0.1175	0.1365	0.0975	0.1265	0.1665	0.1615
HMDB01487	NADH	C21H29N7O14P2		0.3145	0.4245	0.5205	0.2165	0.3775	0.3025	0.6755	0.4315	-0.0035	0.2435	0.2705	0.4225	-0.0435	-0.1745	-0.1535	-0.3045	-0.3125	-0.3275	0.1225	0.1065
HMDB00290	UDP-N-acetyl-alpha-D-glucosamine/UDP-N-acetyl-alpha-D-galactosamine	C17H27N3O17P2		0.3265	0.3795	0.3635	0.2865	0.2675	0.3045	0.4035	0.2435	0.1955	0.2245	0.2515	0.2815	-0.0735	-0.1195	0.2605	0.2845	0.0535	0.0525	0.0945	0.1015
HMDB00052	N(omega)-(L-Arginino)succinate	C10H18N4O6		0.333	0.325	0.347	0.171	0.214	0.201	0.068	-0.034	0.003	-0.025	-0.003	0.023	0.118	0.105	0.02	0.013	-0.045	-0.092	0.284	0.331
HMDB01409	dUMP	C9H13N2O8P		-0.0545	-0.1175	-0.2055	-0.1445	-0.1315	-0.2665	0.0885	-0.0035	0.1445	-0.3505	-0.2635	-0.2925	0.3895	0.4065	0.1115	0.1835	0.6865	0.6935	0.3575	0.3885
HMDB60067	CMP-2-aminoethylphosphonate	C11H20N4O10P2		0.306	0.336	0.279	0.099	-0.061	0.032	-0.074	-0.109	-0.162	0.213	0.151	0.184	-0.399	-0.252	0.123	0.091	-0.462	-0.376	-2.344	-1.242
HMDB60072	CMP-N-trimethyl-2-aminoethylphosphonate	C14H26N4O10P2		0.566	0.595	0.575	0.283	0.22	0.321	-0.064	-0.084	-0.096	0.041	-0.026	0.085	-0.291	-0.258	0.304	0.283	-0.06	-0.14	-0.601	-0.509
HMDB00132	Guanine	C5H5N5O		0.275	0.304	0.344	0.068	0.033	0.044	-0.041	0.026	-0.048	0.186	0.103	0.136	-0.157	-0.109	-0.015	-0.048	-0.082	-0.15	0.164	0.155
HMDB00574	L-cysteine	C3H7NO2S		0.379	0.302	0.334	0.504	0.584	0.514	0.413	0.374	-0.458	0.366	0.434	0.58	-0.917	-0.682	-0.595	-0.463	-0.091	-0.077	-0.289	-0.182
HMDB00288	UMP	C9H13N2O9P		0.5485	0.6225	0.5475	0.3865	0.3595	0.3995	0.4045	0.2215	0.3055	0.0975	0.1725	0.0445	-0.4225	-0.4565	-0.3225	-0.3365	-0.1855	-0.2255	-0.1545	-0.1685
HMDB00300	uracil	C4H4N2O2		0.3965	0.4165	0.5165	0.6675	0.6865	0.7045	0.6665	0.6115	0.4645	0.5755	0.5705	0.6445	-0.0405	-0.0935	-0.0955	-0.1255	-0.1615	-0.0905	-0.0165	-0.0215
HMDB00099	Cystathionine	C7H14N2O4S		2.1585	2.2315	2.2245	0.9385	1.0125	1.0135	-0.0245	0.2095	0.3035	1.4495	1.4495	1.5245	-1.0345	-1.7685	0.7335	0.7205	-2.5075	-1.7195	0.3975	0.4055
HMDB00271	sarcosine	C3H7NO2		0.156	0.27	0.266	0.686	0.709	0.712	-0.01	-0.004	-0.125	0.551	0.615	0.633	0.049	0.03	-0.147	-0.232	-0.205	-0.297	0.141	0.105
HMDB00162	L-proline	C5H9NO2		-0.0445	0.0245	-0.0175	-0.0475	-0.0515	-0.0375	0.0805	0.0625	-0.0725	0.2115	0.2005	0.2375	0.0065	-0.0575	0.0245	0.0305	-0.0655	-0.0345	0.0445	0.0245
HMDB12880	acetamidopropanal	C5H9NO2		0.0225	0.0925	0.0515	0.0195	0.0165	0.0305	0.1485	0.1305	-0.0035	0.2815	0.2695	0.3065	0.0675	0.0035	0.0865	0.0915	-0.0035	0.0265	0.1055	0.0845
HMDB01565	choline phosphate	C5H14NO4P		0.1105	0.1505	0.1665	0.2105	0.2085	0.2345	0.2555	0.2385	0.1085	0.4565	0.4385	0.4625	-0.0605	-0.0455	-0.7565	-0.7505	-0.1515	-0.1485	-0.2185	-0.2125
HMDB00190	lactate	C3H6O3		0.143	0.19	0.113	0.219	0.199	0.248	0.068	0.118	-0.069	0.419	0.401	0.437	-0.078	-0.17	-0.072	-0.018	-0.157	-0.067	-0.058	-0.072
HMDB00292	Xanthine	C5H4N4O2		0.6555	0.6605	0.7115	0.7035	0.7095	0.7215	0.4985	0.6015	0.4355	0.5915	0.5895	0.6965	-0.1145	-0.1265	-0.2265	-0.2245	-0.1445	-0.1375	-0.1535	-0.1685
HMDB00824	propionyl-carnitine	C10H19NO4		0.288	0.281	0.334	0.306	0.445	0.35	0.175	0.148	0.021	0.364	0.415	0.389	0.245	0.274	0.395	0.4	0.033	-0.056	0.207	0.224
HMDB00251	Taurine	C2H7NO3S		0.167	0.203	0.212	0.385	0.352	0.412	0.255	0.326	0.069	0.093	0.09	0.128	0.168	0.135	0.045	0.08	-0.159	-0.123	-0.47	-0.477
HMDB02013	butyryl carnitine	C11H21NO4		0.4	0.439	0.445	0.35	0.406	0.395	0.124	0.072	0	0.291	0.249	0.331	0.299	0.245	0.241	0.253	-0.788	-0.793	-0.291	-0.334
HMDB00064	creatine	C4H9N3O2		0.1265	0.1445	0.1525	0.2105	0.1885	0.2495	0.0615	0.0905	-0.0305	0.1885	0.1455	0.1895	-0.0665	-0.1025	-0.0695	-0.0535	-0.4775	-0.4485	-0.4625	-0.4775
HMDB00086	sn-Glycero-3-phosphocholine	C8H20NO6P		0.1975	0.2495	0.2945	0.0435	0.0095	0.0635	0.1535	0.0735	0.0155	0.0215	-0.0225	0.0105	0.0745	0.0375	0.0175	0.0495	-0.0175	0.0395	-0.7445	-0.7355
HMDB00012	Deoxyuridine	C9H12N2O5		0.6265	0.7405	0.6805	-0.0005	-0.0155	0.0535	0.7205	0.5245	0.6135	-0.0765	-0.1405	0.0095	-0.1685	-0.0505	-0.1615	-0.1715	-0.2185	-0.1185	0.0005	0.0325
HMDB00262	thymine/imidazol-4-ylacetate	C5H6N2O2		0.582	0.602	0.674	0.082	0.167	0.123	0.466	0.54	0.508	0.005	0.033	0.146	-0.003	0.044	0.086	0	-0.204	-0.19	0.28	0.225
HMDB00273	Thymidine	C10H14N2O5		0.9695	0.9865	1.0975	0.3175	0.4305	0.3535	0.8265	0.8365	0.8355	0.0925	0.0655	0.1505	-0.5645	-0.4795	-0.0385	-0.0285	-0.6595	-0.9615	-0.4785	-0.5995
HMDB00812	N-acetyl-L-aspartate/2-Amino-3-oxoadipate	C6H9NO5		0.5075	0.6155	0.5895	-0.3665	-0.3625	-0.3045	0.1035	0.0325	-0.0195	-0.7055	-0.6685	-0.4765	-0.1895	-0.2115	0.6905	0.7005	0.1075	0.1595	-0.1715	-0.1665
HMDB01241	2-aminomuconate	C6H7NO4		0.3935	0.4685	0.4915	-0.5865	-0.6065	-0.5445	-0.0965	-0.2215	-0.1715	-0.9665	-0.9225	-0.6345	-0.2365	-0.1785	0.6485	0.6055	0.1525	0.1365	-0.1535	-0.1115
HMDB01185	S-adenosyl-L-methionine	C15H22N6O5S		0.061	0.059	0.078	-0.066	-0.093	-0.075	-0.554	-0.369	-0.477	-0.635	-0.44	-0.496	-0.188	-0.154	0.2	0.173	-0.195	-0.186	-0.347	-0.272
HMDB01031	2-deoxy-D-ribose 5-phosphate/2-Deoxy-D-ribose 1-phosphate	C5H11O7P														-0.598	-0.454	-0.283	-0.2	0.007	0.057	0.051	0.095
HMDB01548	ribose-phosphate	C5H11O8P		-0.014	-0.103	-0.097	-0.021	-0.018	-0.027	0.025	0.221	0.383	0.035	0.1	0.072	-0.226	-0.221	0.097	0.143	-0.085	-0.084	-0.038	-0.026
HMDB01321	D-Erythrose 4-phosphate	C4H9O7P		-0.0185	0.0635	0.0525	-0.2905	-0.3015	-0.2515	-0.3145	-0.3055	-0.2375	0.1825	0.1745	0.3275	-0.4195	-0.3005	-0.0085	0.0085	0.1335	0.1085	0.0725	0.0855
METPA0585	Sedoheptulose 7-phosphate	C7H15O10P		-0.0145	0.0095	0.0075	0.2065	0.2135	0.2205	-0.1325	-0.0275	-0.0685	0.5465	0.5215	0.6415	-0.4225	-0.3755	-0.1495	-0.1505	-0.1485	-0.1435	-0.3115	-0.2885
HMDB01401	G6P/F6P	C6H13O9P		0.382	0.437	0.39	-0.149	-0.148	-0.13	-0.357	-0.248	-0.381	0.525	0.519	0.662	-0.475	-0.465	-0.067	-0.03	0.131	0.159	0.092	0.091
HMDB00230	N-acetylneuraminic acid	C11H19NO9		-0.068	-0.062	0.002	0.429	0.438	0.442	0.261	0.272	0.211	0.342	0.329	0.386	-0.381	-0.33	-0.413	-0.455	-0.045	-0.096	0.486	0.46
HMDB00050	adenosine	C10H13N5O4		-0.515	-1.228	-1.337	-1.505	-1.461	-1.421	-0.87	0.755	0.975	0.236	0.29	-0.574	-1.265	-1.261	-1.076	-1.182	-0.976	-0.738	-1.565	-1.488
HMDB60158	Tetracosatetraenoyl carnitine	C31H53NO4		0.5215	0.4685	0.5345	0.4985	0.4145	0.3685	0.2975	0.2885	0.2175	0.4885	0.3055	-0.0145	0.3245	0.4255	0.4855	0.4205	-1.6965	-1.8055	-1.9755	-1.9515
HMDB00089	cytidine	C9H13N3O5		0.3525	0.4025	0.4365	0.2695	0.3425	0.3185	-0.4205	-0.1745	-0.5415	0.6115	0.6005	0.6565	-1.3345	-1.2995	-1.9215	-1.6965	-1.2845	-1.8835	-2.0415	-1.1685
HMDB00095	CMP	C9H14N3O8P		0.1695	0.2315	0.1435	-0.0315	-0.0125	-0.0315	0.0525	0.0055	0.1655	0.0905	0.1705	0.0355	-0.7635	-0.6955	-0.6895	-0.6645	-0.6045	-0.6555	-0.3175	-0.2635
HMDB01265	L-Fucose 1-phosphate	C6H13O8P		-0.0635	-0.0095	0.0095	0.1485	0.1575	0.1835	0.3125	0.3795	0.2075	0.0385	0.0915	0.0425	-1.2205	-1.3775	-0.5845	-0.5945	-1.1035	-1.0275	-0.9505	-1.1265
HMDB01397	GMP	C10H14N5O8P		0.589	0.666	0.562	0.522	0.487	0.513	0.495	0.428	0.433	0.04	0.116	-0.014	-0.944	-0.758	-0.518	-0.568	-0.822	-0.838	-1.228	-1.098
HMDB00045	AMP	C10H14N5O7P		0.531	0.574	0.605	0.375	0.337	0.391	0.4	0.223	0.246	0.012	0.047	-0.045	-0.872	-0.872	-0.987	-0.963	-1.067	-1.055	-1.057	-1.024
HMDB01413	CDPcholine	C14H26N4O11P2		0.53	0.573	0.521	0.495	0.469	0.514	0.301	0.251	0.214	0.339	0.304	0.319	-1.116	-1.033	-0.5	-0.51	-0.935	-0.896	-1.485	-1.44
HMDB01043	arachidonic acid	C20H32O2		0.05	-0.049	0.037	0.017	0.002	-0.054	0.044	0.085	0.175	-0.119	-0.244	-0.395	-0.486	-0.477	-0.468	-0.496	-0.911	-0.795	-0.93	-0.903
HMDB00133	guanosine	C10H13N5O5		-0.3355	-0.5615	-0.4115	0.0785	0.0935	0.0425	0.1075	0.2755	0.3975	-0.0615	-0.0845	-0.1545	-1.8165	-1.8675	-1.4995	-1.4095	-1.8645	-1.6675	-2.4445	-2.7875
HMDB00157	Hypoxanthine	C5H4N4O		0.328	0.343	0.365	0.402	0.416	0.409	0.277	0.364	0.197	0.411	0.407	0.485	-1.539	-1.44	-1.769	-1.66	-2.132	-2.057	-2.648	-2.069
HMDB00195	inosine	C10H12N4O5		0.28	0.197	0.198	0.37	0.354	0.34	0.353	0.445	0.434	0.293	0.233	0.24	-2.531	-2.304	-1.949	-1.963	-1.823	-1.853	-2.127	-2.103
HMDB00296	uridine	C9H12N2O6		0.246	0.313	0.229	0.256	0.263	0.303	0.405	0.412	0.386	0.092	0.046	0.126	-1.71	-1.653	-1.787	-1.778	-1.78	-1.815	-1.139	-1.153
HMDB00848	stearoylcarnitine	C25H49NO4		0.2695	0.2515	0.1615	0.3975	0.3015	0.2885	0.0495	0.2775	0.2295	0.6305	0.5685	0.3035	-0.1805	-0.1405	-0.9175	-1.1135	-1.0015	-0.9545	-1.7335	-1.7795
HMDB13336	3-hydroxyhexadecanoylcarnitine	C23H45NO5		0.447	0.445	0.47	0.892	0.921	0.899	0.331	0.378	0.35	0.319	0.262	0.073	-0.145	-0.09	-0.256	-0.371	-2.772	-1.139	-1.783	-3.027
HMDB06464	Elaidic carnitine/Vaccenyl carnitine	C25H47NO4		0.288	0.279	0.305	0.326	0.321	0.35	0.094	0.084	-0.016	0.214	0.091	-0.025	-0.042	-0.033	-0.513	-0.502	-1.336	-1.25	-1.511	-1.611
HMDB00222	L-palmitoylcarnitine	C23H45NO4		0.217	0.203	0.162	0.412	0.376	0.399	0.077	0.121	0.094	0.326	0.218	0.077	0.125	0.126	-0.556	-0.568	-1.315	-1.271	-1.259	-1.379
HMDB06317	trans-Hexadec-2-enoyl carnitine	C23H43NO4		0.334	0.353	0.41	0.402	0.411	0.451	0.179	0.132	-0.006	0.018	-0.06	-0.068	0.285	0.295	-0.075	-0.04	-1.146	-1.075	-1.135	-1.201
HMDB05066	tetradecanoyl carnitine(myristoyl carnitine)	C21H41NO4		0.38	0.4	0.417	0.519	0.504	0.566	0.104	0.094	0.058	0.236	0.17	0.084	0.518	0.501	-0.18	-0.126	-1.608	-1.744	-0.949	-1.025
HMDB02250	lauroyl carnitine	C19H37NO4		0.307	0.356	0.419	0.561	0.608	0.612	0.076	0.095	0.061	0.133	0.246	0.068	0.451	0.485	-0.151	-0.215	-1.499	-1.21	-0.936	-1.049
HMDB00791	octanoyl carnitine/L-Octanoylcarnitine	C15H29NO4		0.217	0.277	0.304	0.552	0.587	0.606	0.045	0.007	-0.059	0.195	0.215	0.212	0.025	0.029	-0.278	-0.291	-1.097	-0.876	-0.853	-0.912
HMDB06210	decanoyl carnitine	C17H33NO4		0.084	0.121	0.21	0.532	0.546	0.571	-0.078	-0.05	-0.128	0.013	0.163	0.002	0.096	0.135	-0.283	-0.398	-1.88	-1.18	-0.901	-1.144
HMDB06469	Linoleyl carnitine/Linoelaidyl carnitine	C25H45NO4		0.0985	0.0835	0.1975	0.0185	0.0415	0.0395	0.2605	0.2515	0.0785	0.1375	0.0615	-0.0205	-0.6815	-0.6425	-0.9705	-0.9765	-1.7755	-1.6985	-2.3325	-2.4185
HMDB06319	alpha-linolenyl carnitine/gamma-linolenyl carnitine	C25H43NO4		-0.0465	-0.0945	0.0525	-0.0325	0.0365	0.0095	0.2875	0.2085	0.1165	-0.1755	-0.2445	-0.2505	-0.4485	-0.4455	-0.7155	-0.7365	-2.6905	-1.7685	-2.5795	-2.9455
HMDB00054	bilirubin	C33H36N4O6		-0.2275	-0.3635	-0.3215	-0.0235	0.0035	-0.0755	-0.0855	-0.1975	-0.2925	-0.4425	-0.5585	-0.7215	-2.0195	-2.7435	-1.0275	-1.0645	-1.3525	-1.4105	-1.2805	-1.5365
HMDB00201	O-acetylcarnitine	C9H17NO4		0.1505	0.1715	0.1365	0.2145	0.2035	0.2135	0.2895	0.2865	0.1075	0.3695	0.3735	0.3885	-0.4085	-0.4325	-0.0885	-0.0825	-0.3355	-0.2755	-0.2495	-0.2795
HMDB13127	3-Hydroxybutyrylcarnitine	C11H21NO5		0.342	0.206	0.262	0.641	0.675	0.628	0.638	0.6	0.495	0.703	0.708	0.744	-0.483	-0.55	-0.264	-0.284	-0.466	-0.484	-0.465	-0.493
HMDB00062	(R)-carnitine	C7H15NO3		0.0535	0.0925	-0.0295	0.2395	0.2175	0.2905	0.1465	0.1305	0.0305	0.2775	0.2505	0.2325	-0.0235	-0.0535	-0.3275	-0.3085	-0.3475	-0.3295	-0.5235	-0.4875
HMDB00043	glycine betaine	C5H11NO2		-0.101	-0.114	-0.113	0.104	0.068	0.097	0.155	0.191	0.056	0.134	0.13	0.137	-0.077	-0.097	-0.198	-0.175	-0.286	-0.296	-0.221	-0.248
HMDB06528	clupanodonic acid/docosa-4,7,10,13,16-pentaenoic acid	C22H34O2		0.0145	-0.2275	-0.1165	0.0525	0.0625	-0.0065	0.0885	0.0265	0.3075	-0.2445	-0.4045	-0.5415	-0.0315	-0.0495	-0.2995	-0.3775	-0.1145	-0.0275	-0.3905	-0.3535
HMDB02925	8,11,14-Eicosatrienoic acid (DGLA)	C20H34O2		-0.0635	-0.2395	-0.1925	0.0165	0.0385	-0.0335	0.0235	-0.0445	0.2575	-0.0385	-0.1265	-0.3685	-0.3175	-0.3435	-0.4555	-0.4605	-0.5055	-0.4605	-0.6445	-0.6195
HMDB00673	linoleic acid/linoelaidic acid (all trans C18:2)/octadecadienoate (n-C18:2)	C18H32O2		0.318	-0.151	-0.029	-0.237	-0.033	-0.152	0.658	0.272	0.899	0.012	-0.164	-0.269	-0.986	-0.999	-0.976	-1.008	-0.792	-0.824	-1.186	-1.142
HMDB03229	palmitoleate	C16H30O2		0.3755	0.0865	0.1635	-0.0645	0.0905	0.0055	0.6015	0.2505	0.7745	-0.0055	-0.2375	-0.2565	-0.2995	-0.3125	-0.3065	-0.3015	-0.3535	-0.3355	-0.4775	-0.4685
HMDB00207	oleic acid/elaidate/trans-vaccenate	C18H34O2		0.2075	-0.0735	-0.0855	-0.0775	0.0205	-0.0675	0.4165	0.0165	0.7165	-0.1635	-0.3155	-0.4765	-0.2415	-0.2635	-0.3695	-0.3655	-0.3095	-0.3075	-0.4565	-0.4415
HMDB00175	IMP	C10H13N4O8P		0.2305	0.2395	0.2255	0.1365	0.1145	0.1205	0.6755	0.7485	0.3715	0.1045	0.1305	0.0685	-0.8615	-0.8385	-0.7405	-0.8725	-0.8365	-0.9855	-0.8575	-0.9645
HMDB01564	CDP-ethanolamine	C11H20N4O11P2		0.331	0.376	0.285	0.425	0.42	0.444	0.071	0.052	0.059	0.318	0.343	0.291	-0.6	-0.524	-0.422	-0.473	-0.533	-0.545	-1.121	-0.918
HMDB00925	Trimethylamine N-oxide	C3H9NO		-0.119	-0.086	-0.191	-0.076	-0.068	-0.075	0.165	0.06	-0.301	0.368	0.416	0.327	-0.354	-0.219	-0.42	-0.578	-0.157	-0.132	-0.287	-0.212
HMDB00092	NN-dimethylglycine	C4H9NO2		-0.0545	-0.0845	-0.0935	-0.0125	-0.0035	-0.0305	-0.0065	0.0595	-0.0355	-0.1405	-0.1045	-0.1145	-0.1215	-0.1285	-0.2865	-0.3345	-0.0765	-0.0695	-0.1495	-0.1415
HMDB13076	spermidine dialdehyde-2	C7H13NO2		-0.042	-0.071	-0.054	0.023	0.01	0.008	0.123	0.184	0.03	0.03	0.032	0.029	-0.52	-0.477	-0.51	-0.526	-0.42	-0.515	-0.423	-0.456
HMDB04586	Perillic acid	C10H14O2		-0.246	-0.339	-0.238	-0.041	-0.045	-0.094	0.019	0.179	-0.044	-0.051	-0.055	-0.007	-0.579	-0.768	-0.73	-0.911	-0.62	-0.574	-0.687	-0.869
HMDB02183	docosahexaenoate(DHA)	C22H32O2		0.1485	-0.0005	0.0775	0.1715	0.1685	0.1185	0.1535	0.0575	0.3445	-0.0265	-0.1115	-0.3135	-0.0445	-0.0705	-0.1885	-0.1995	-0.1545	-0.0875	-0.3465	-0.3195
HMDB00630	cytosine	C4H5N3O		0.5705	0.6545	0.7505	0.2265	0.2345	0.2055	-0.1005	0.2075	0.1335	0.6435	0.6485	0.6995	-0.2375	-0.2035	-0.5865	-0.5135	-0.3905	-0.4095	-0.2515	-0.2345
HMDB00014	2-deoxycytidine	C9H13N3O4		0.637	0.739	0.768	0.237	0.248	0.204	-0.235	0.184	0.171	0.585	0.561	0.632	-0.196	-0.183	-0.305	-0.331	-0.168	-0.198	-0.183	-0.171
HMDB00030	Biotin	C10H16N2O3S		0.3885	0.4415	0.4725	0.3105	0.3595	0.3405	-0.3775	-0.0505	-0.4625	0.5035	0.4715	0.5355	-0.1855	-0.1915	-1.9625	-3.1365	-1.4035	-2.7115	-0.1065	-0.1285
HMDB00161	L-alanine	C3H7NO2		0.0695	0.0915	0.1055	0.0825	0.0795	0.1095	-0.0085	-0.0185	-0.0995	0.1625	0.1535	0.1925	-0.2455	-0.2505	-0.0125	-0.0005	-0.3225	-0.3165	0.0595	0.0495
HMDB00126	Glycerol 3-phosphate	C3H9O6P		0.1565	0.1275	0.2375	0.1905	0.1945	0.2395	0.3075	0.2525	0.1325	0.3125	0.3085	0.4365	-0.1495	-0.1215	-0.7165	-0.7215	-0.7425	-0.7755	-0.5675	-0.5545
HMDB03290	gulonate	C6H12O7		0.003	0.003	0.074	0.115	0.107	0.168	0.469	0.437	0.421	0.133	0.13	0.221	-0.519	-0.467	-0.655	-0.651	-0.145	-0.281	-0.13	-0.077
HMDB02366	tiglyl carnitine	C12H21NO4		-0.0615	-0.0405	0.0095	0.8775	0.8845	0.8955	0.0145	-0.0085	-0.0525	0.0065	-0.0065	0.0315	0.8045	0.7925	0.2065	0.1825	0.0265	0.0205	-0.2465	-0.2715
HMDB00939	S-Adenosyl-L-homocysteine	C14H20N6O5S		0.4335	0.4095	0.4705	0.2245	0.2195	0.2175	0.0075	-0.0105	0.1105	-0.2485	-0.2115	-0.1515	-0.7935	-0.9055	0.1785	0.0705	-0.6065	-0.6335	0.0115	-0.0045
HMDB00425	3-Deoxy-D-glycero-D-galacto-2-nonulosonic acid	C9H16O9		0.3835	0.4215	0.4585	0.0185	-0.0335	0.0165	-0.1955	-0.2225	-0.2825	0.2895	0.2985	0.3375	-0.1185	-0.1135	-0.0995	-0.0905	-0.0025	-0.0105	-0.3095	-0.2945
HMDB01014	4-Imidazolone-5-propanoate	C6H8N2O3		0.104	0.079	0.119	0.155	0.191	0.17	-0.45	-0.301	-0.192	-0.217	-0.121	-0.071	-0.173	-0.105	0.193	0.119	-0.189	-0.223	-0.071	-0.053
HMDB00742	L-homocysteine	C4H9NO2S														-0.151	-0.17	0.008	-0.117	0.048	-0.044	-0.002	0.019
HMDB00895	acetylcholine/4-(trimethylammonio)butanoate	C7H15NO2		-0.265	-0.244	-0.186	-0.035	-0.079	-0.059	-0.113	-0.205	-0.276	-0.092	-0.117	-0.11	0.223	0.22	0.037	0.031	-0.05	-0.047	-0.219	-0.227
HMDB00562	creatinine	C4H7N3O		-0.2245	-0.2145	-0.1745	-0.0935	-0.1135	-0.0955	-0.2525	-0.2165	-0.3565	-0.2015	-0.1895	-0.1735	-0.0035	-0.0615	-0.0965	-0.0975	-0.1235	-0.0555	-0.0695	-0.0755
HMDB06348	pseudoecgonine/ecgonine	C9H15NO3		-0.0635	-0.0245	-0.0635	-0.0045	0.0145	-0.0435	-0.1115	-0.1365	-0.1915	-0.0895	-0.1105	-0.0465	0.2775	0.3045	0.1815	0.1335	-0.0345	-0.0305	-0.0025	-0.0245
HMDB41876	N1,N12-diacetylspermidine	C11H23N3O2														-1.702	-2.672	-0.531	-0.531	-0.548	-0.608	0.536	0.514
HMDB01123	anthranilate	C7H7NO2		0.136	0.14	0.022	0.172	0.184	0.18	0.264	0.17	0.119	0.18	0.135	0.174	-0.151	-0.113	-0.033	-0.031	0.095	0.024	-0.086	-0.079
HMDB03976	D-Glucuronate 1-phosphate	C6H11O10P		-0.2565	-0.1935	-0.1425	0.1925	0.2655	0.2005	0.3285	0.2365	0.2045	-0.1125	-0.0765	0.1445	-0.3665	-0.3485	-0.0855	-0.0875	0.1845	0.1485	-0.4225	-0.4965
HMDB01254	D-Glucosamine 6-phosphate	C6H14NO8P		0.159	0.142	0.143	0.296	0.285	0.29	0.242	0.276	0.123	0.214	0.044	0.114	-0.001	0.004	-0.434	-0.452	-0.061	-0.074	-0.473	-0.531
HMDB00699	1-methylnicotinamide	C7H8N2O		0.4895	0.4605	0.5325	0.5585	0.5835	0.6125	1.1055	1.1555	0.9655	0.6235	0.5945	0.6425	-2.7255	-3.8645	-4.0755	-3.0625	-0.1925	-0.2815	-1.5865	-1.5735
HMDB01406	Nicotinamide	C6H6N2O		0.357	0.374	0.42	0.14	0.12	0.088	0.219	0.352	0.221	0.304	0.311	0.335	-0.445	-0.468	-0.01	0.002	-0.015	0.082	-0.332	-0.363
HMDB00071	Deoxyinosine	C10H12N4O4		0.395	0.503	0.441	0.083	0.116	0.07	0.222	0.35	0.375	0.213	0.169	0.303	-0.904	-0.944	-0.665	-0.788	-1.333	-1.664	-1.68	-1.367
