# Supplementary material for: Integrated Metabolic Profiling and Gene Expression Analysis Reveals Therapeutic Modalities in Breast Cancer
Source: Research Square preprint supplement (doi:10.21203/rs.3.rs-117384/v1), 2020-12-09
Supplement: Supplementary file 10 [file c6ea6cb579ffb7654e9666cc.xlsx]

## Sheet: Table S7
Supplementary Table 7. Transformed metabolomics data of WHIM2 PDX xenograft with drug treatment.
			Sample Name	CRI242-QC-1	CRI242-QC-2	CRI242-QC-3	UNTREATED-1	UNTREATED-2	UNTREATED-3	CB-839 15D-1	CB-839 15D-2	CB-839 15D-3	BREQUINAR 15D-1	BREQUINAR 15D-2	BREQUINAR 15D-3
HMDB	Metabolite	Chemical Formaula
HMDB00082	Cytidine-5'-triphosphate	C9 H16 N3 O14 P3		0.0085	0.0065	0.0195	-0.0065	-0.1645	-0.1685	0.0095	-0.3945	0.0395	0.1795	-0.0545	-0.1435
HMDB01546	CYTIDINE DIPHOSPHATE	C9 H15 N3 O11 P2		0.0425	0.0355	0.0445	0.2335	-0.0185	-0.0265	0.0185	-0.3835	-0.1225	0.2945	-0.1915	-0.1765
HMDB00295	Uridine diphosphate	C9 H14 N2 O12 P2		0.0705	0.0535	0.0615	0.1455	-0.0325	-0.0515	-0.0035	-0.0695	-0.0125	0.3005	0.0085	0.1065
HMDB01511	PHOSPHOCREATINE	C4 H10 N3 O5 P		-0.0025	0.0085	-0.0165	0.1975	0.0535	-0.0345	0.1125	-0.1465	-0.2995	0.1265	-0.0255	-0.2365
HMDB00127	GLUCURONATE	C6 H10 O7		0.0125	-0.0125	-0.0235	0.0585	-0.0865	0.0145	0.0665	-0.0555	-0.0505	0.0445	0.0245	-0.0545
HMDB00034	ADENINE	C5 H5 N5		-0.0355	-0.0175	-0.0015	0.0235	-0.0065	0.0135	0.0345	-0.0075	-0.0135	0.0055	0.0025	-0.0065
HMDB01256	SPERMINE	C10 H26 N4		0.0145	0.0125	0.0325	-0.0155	-0.0655	0.0445	-0.0115	0.0015	-0.0205	0.1245	-0.0815	0.0035
HMDB03011	O-ACETYLSERINE	C5 H9 N O4		0.0065	0.0035	0.0165	0.0855	0.0335	0.0595	-0.0235	0.0135	-0.0175	0.0405	-0.0565	-0.0155
HMDB03339	GLUTAMATE	C5 H9 N O4		0.014	0.01	-0.003	0.115	0.022	0.057	0.075	0.032	-0.026	0.008	-0.009	-0.017
HMDB00893	SUBERATE	C8 H14 O4		-0.0445	-0.0615	-0.0095	2.3595	-0.1635	-0.0015	-0.1435	-0.0535	0.1055	0.1305	0.0435	0.0735
HMDB01341	Adenosine diphosphate	C10 H15 N5 O10 P2		-0.0315	-0.0585	-0.0585	0.3205	-0.0705	0.0485	-0.0055	0.0505	0.0675	0.1555	-0.2315	-0.0485
HMDB00705	hexanoylcarnitine	C13 H25 N O4		0.016	-0.004	0.004	0.205	0.12	0.047	0.063	-0.054	-0.03	-0.14	-0.094	-0.08
HMDB00929	TRYPTOPHAN	C11 H12 N2 O2		0.0175	0.0005	-0.0065	0.0755	0.0885	-0.0235	-0.0025	-0.0095	-0.0495	-0.0725	-0.0195	-0.0645
HMDB00791	octanoylcarnitine	C15 H29 N O4		-0.004	-0.024	0.007	0.167	0.011	-0.014	0.103	-0.045	0.004	-0.117	0.031	0.012
HMDB01044	DEOXYGUANOSINE-MONOPHOSPHATE	C10 H14 N5 O7 P		-0.0705	0.0125	-0.0035	0.1495	0.0035	-0.0265	0.0655	0.0155	-0.0455	-0.1325	0.0145	-0.0355
HMDB00272	PHOSPHOSERINE	C3 H8 N O6 P		-0.069	0.003	0.03	0.073	-0.108	0.148	-0.007	-0.003	0.048	0.015	-0.016	0.043
HMDB00904	CITRULLINE	C6 H13 N3 O3		0.0205	0.0805	0.1165	0.1125	0.0595	0.1805	-0.0695	-0.0765	-0.0445	-0.0095	-0.0435	0.0005
HMDB00027	TETRAHYDROBIOPTERIN	C9 H15 N5 O3		0.015	-0.028	0.003	0.066	-0.013	0.076	0.024	-0.054	-0.02	0.023	-0.062	-0.019
HMDB62660	N-METHYLGLUTAMATE	C6 H11 N O4		0.0795	-0.0225	-0.0185	0.1885	-0.0135	0.1325	-0.0515	0.0015	-0.0525	0.0845	-0.1665	-0.1355
HMDB03355	5-Aminopentanoic acid	C5 H11 N O2		0.0045	0.0305	0.0475	0.1345	-0.0285	0.1435	-0.0455	-0.0045	-0.0305	0.0875	-0.1905	-0.0995
HMDB00510	AMINOADIPATE	C6 H11 N O4		-0.005	0.014	0.017	0.13	-0.045	0.096	-0.032	-0.022	-0.064	0.016	-0.179	-0.14
HMDB00039	BUTANOATE	C4 H8 O2		-0.105	-0.048	-0.069	0.057	0.058	0.093	-0.092	0.029	0.047	0.204	-0.116	-0.029
HMDB00073	DOPAMINE	C8 H11 N O2		-0.1275	-0.0085	-0.0695	0.0985	0.0285	0.0955	-0.1695	0.0185	0.0275	0.0405	-0.1405	-0.0625
HMDB01015	N-FORMYL-L-METHIONINE	C6 H11 N O3 S		-0.028	-0.011	-0.007	0.019	0.073	0.044	-0.146	0.008	0.007	0.028	-0.066	-0.079
HMDB02064	N-ACETYLPUTRESCINE	C6 H14 N2 O		0.0005	-0.0345	0.0175	0.0475	0.0795	0.1045	-0.3235	-0.0215	-0.0365	0.1205	-0.0275	-0.1265
0	MALEIMIDE	C4 H3 N O2		0.047	-0.154	-0.12	0.154	0.113	0.163	-0.011	-0.054	0.06	0.011	-0.145	-0.105
HMDB00078	CYS-GLY	C5 H10 N2 O3 S		0.0795	-0.2785	-0.1385	0.0155	0.0585	0.0095	-0.1725	-0.1065	-0.0095	0.0695	-0.0635	0.0245
HMDB00939	S-ADENOSYLHOMOCYSTEINE-1	C14 H20 N6 O5 S		0.1135	0.0055	0.0095	0.0765	0.1195	-0.0105	-0.0975	0.0585	-0.0055	0.1195	-0.0925	-0.0275
HMDB00243	PYRUVATE	C3 H4 O3		0.018	-0.018	-0.025	0.017	0.018	-0.022	-0.066	-0.012	-0.042	0.039	-0.045	-0.043
HMDB00033	CARNOSINE	C9 H14 N4 O3		0.007	-0.007	0.011	-0.036	-0.031	0.134	-0.041	-0.101	0.259	0.031	-0.072	-0.12
HMDB00194	ANSERINE	C10 H16 N4 O3		0.1155	-0.0715	-0.0315	0.0745	0.0365	0.1815	-0.0855	-0.2395	0.3635	0.0305	-0.1335	-0.1785
HMDB00175	INOSINE MONOPHOSPHATE	C10 H13 N4 O8 P		0.067	-0.002	0.002	-0.014	0.037	0.22	-0.076	0.01	0.355	-0.033	-0.122	-0.162
HMDB00126	GLYCEROL 3-PHOSPHATE	C3 H9 O6 P		0.0265	0.0015	-0.0015	0.1175	0.0575	0.0635	-0.0755	-0.1115	0.0705	0.0305	-0.0545	-0.0715
HMDB00187	SERINE	C3 H7 N O3		0.037	0.011	-0.045	0.044	-0.039	0.066	-0.132	-0.014	-0.023	0.016	-0.011	-0.066
HMDB01861	3-METHYLHISTAMINE	C6 H11 N3		0.0125	-0.0275	-0.0175	0.0375	-0.1435	0.1895	-0.0795	-0.0905	0.0035	0.0365	-0.0435	-0.0085
HMDB00259	SEROTONIN	C10 H12 N2 O		0.058	0.005	-0.005	0.076	-0.069	0.328	-0.068	-0.147	0.068	0.163	-0.156	-0.445
HMDB00870	HISTAMINE	C5 H9 N3		0.083	-0.021	-0.009	0.135	-0.031	0.292	-0.039	-0.608	-0.054	0.115	-0.211	-0.234
HMDB00998	Deoxycytidine triphosphate	C9 H16 N3 O13 P3		0.0025	0.0425	-0.0125	0.1315	-0.0295	-0.0805	-0.1595	-0.0595	0.0235	0.0875	-0.1395	-0.0665
0	2-ACETAMIDO-2-DEOXY-BETA-D-GLUCOSYLAMINE	C8 H16 N2 O5		-0.031	0.006	-0.006	-0.05	-0.063	0.023	-0.138	-0.061	0.052	0.088	-0.032	-0.041
HMDB01058	Fructose 1,6-bisphosphate	C6 H14 O12 P2		0.019	0.007	0.011	-0.039	0.021	0.123	-0.235	-0.119	0.022	-0.012	-0.145	-0.109
HMDB05765	OPHTHALMATE-2	C11 H19 N3 O6		-0.0485	-0.0085	-0.0365	-0.0575	0.0645	0.0305	-0.1755	-0.0015	0.0225	0.1185	-0.0935	0.0205
HMDB01112	GLYCERALDEHYDE 3-PHOSPHATE	C3 H7 O6 P		-0.009	0.019	-0.002	0.002	-0.04	0.029	-0.206	-0.032	0.058	-0.002	0.018	0.006
-----	Hypoxanthine-2	C5 H4 N4 O		0.015	-0.016	0	-0.025	-0.034	0.023	-0.095	-0.032	0	-0.033	0.015	-0.013
HMDB00058	CYCLIC AMP	C10 H12 N5 O6 P		-0.092	0.088	-0.127	0.237	0.05	0.157	-0.285	-0.023	0.023	0.218	-0.056	-0.023
HMDB01372	THIAMINE PYROPHOSPHATE	C12 H19 N4 O7 P2 S		0.0305	-0.1735	-0.1295	0.0165	-0.0645	-0.1845	-0.0335	-0.2915	-0.0165	0.1475	-0.1765	0.0645
HMDB01065	PHENYLETHANOLAMINE	C8 H11 N O		-0.051	0.185	-1.616	0.048	-1.77	-0.101	-0.085	-1.66	0.148	0.256	0.035	-1.533
HMDB00939	S-ADENOSYLHOMOCYSTEINE-2	C14 H20 N6 O5 S		0.225	0.02	-0.037	0.155	-0.011	0	0.046	-0.067	0	0.094	-0.005	-0.108
HMDB01314	CYCLIC GMP	C10 H12 N5 O7 P		0.2795	-0.0195	-0.0555	0.2625	-0.1625	-0.0285	-0.0235	0.0065	-0.0545	0.3145	0.2875	-0.0645
HMDB00044	ASCORBATE	C6 H8 O6		0.0715	-0.0025	-0.0415	0.0685	0.0345	-0.0315	-0.0015	0.0015	-0.0795	0.0405	-0.0215	-0.0585
HMDB00532	N-ACETYLGLYCINE	C4 H7 N O3		0.043	-0.024	-0.093	0.026	-0.106	-0.045	-0.114	0.078	-0.015	0.138	0.059	-0.036
HMDB02757	CYSTEATE	C3 H7 N O5 S		-0.005	-0.027	0.028	-0.058	-0.021	0.068	-0.231	-0.019	-0.063	0.121	0.005	0.007
HMDB01107	7-METHYLGUANOSINE	C11 H15 N5 O5		0.0345	-0.0115	-0.0195	-0.0745	-0.0435	-0.0565	-0.1825	0.0085	-0.0815	0.0715	0.0045	0.0325
HMDB01434	3-METHOXYTYROSINE	C10 H13 N O4		0.0355	0.0435	-0.0285	-0.0785	0.0475	0.0725	-0.1085	-0.0155	-0.0625	0.0925	0.0575	-0.0235
HMDB01254	GLUCOSAMINE 6-PHOSPHATE	C6 H14 N O8 P		0.0015	-0.0225	-0.0045	-0.0425	-0.0175	-0.0215	-0.0285	-0.0015	0.0055	0.0615	-0.0025	0.0095
HMDB42012	SALSOLINOL	C10 H13 N O2		0.0195	-0.0275	0.0735	-0.0745	-0.0825	-0.0245	-0.0865	-0.0195	0.1225	0.1505	-0.0645	0.0445
HMDB00063	CORTISOL	C21 H30 O5		-0.1515	-0.0165	0.0345	-0.1105	-0.1275	-0.0105	0.0355	-0.0095	0.0095	-0.0265	0.2705	0.1375
HMDB00050	Adenosine	C10 H13 N5 O4		-0.1065	-0.1365	-0.1345	-0.1645	-0.1205	-0.0245	-0.0125	0.0095	0.0535	0.0045	0.0605	-0.0045
HMDB01321	Erythrose 4-phosphate	C4 H9 O7 P		0.055	-0.025	-0.03	-0.031	-0.015	0.075	-0.116	-0.071	0.088	0.047	0.004	0.049
HMDB00294	UREA	C H4 N2 O		-0.092	0.016	-0.089	0.022	-0.06	-0.105	-0.188	-0.007	0.104	0.074	0.007	0.049
HMDB00015	CORTEXOLONE	C21 H30 O4		-0.0275	-0.0255	0.0135	0.0345	-0.1285	-0.0115	-0.3175	-0.0915	0.0185	0.1815	0.0675	0.0465
HMDB01252	BETAINE ALDEHYDE	C5 H11 N O		-0.009	0.002	0.006	-0.028	-0.116	0.001	-0.17	-0.08	-0.048	0.085	0.004	0.007
HMDB00126	Glycerol 3-phosphate	C3 H9 O6 P		-0.0165	-0.0205	-0.0015	0.0145	-0.0435	0.0375	-0.1285	-0.1415	0.0545	0.0615	0.0015	-0.0215
HMDB00906	TRIMETHYLAMINE	C3 H9 N		-0.021	-0.002	-0.008	-0.082	-0.142	0.014	-0.052	0.001	0.02	-0.001	0.058	0.055
HMDB00807	3-Phosphoglyceric acid	C3 H7 O7 P		-0.021	-0.093	-0.06	-0.148	-0.141	0.007	-0.118	0.052	0.158	0.25	-0.007	0.069
HMDB01548	Ribose 5-phosphate	C5 H11 O8 P		0.0085	-0.0125	-0.0085	-0.0385	-0.0445	0.0335	-0.0395	0.0235	0.0285	0.0355	0.0355	0.0375
HMDB00076	DIHYDROURACIL	C4 H6 N2 O2		-0.0045	-0.0045	-0.0015	0.0015	-0.0465	0.0025	-0.0365	0.0185	0.0335	0.0425	0.0085	-0.0035
HMDB00857	6-CARBOXYHEXANOATE	C7 H12 O4		-0.039	-0.056	-0.004	-0.104	-0.158	0.004	-0.138	-0.048	0.111	0.136	0.049	0.079
HMDB01545	PYRIDOXAL	C8 H9 N O3		-0.039	-0.056	-0.004	-0.104	-0.158	0.004	-0.138	-0.048	0.111	0.136	0.049	0.079
HMDB00792	SEBACATE	C10 H18 O4		-0.039	-0.056	-0.004	-0.104	-0.158	0.004	-0.138	-0.048	0.111	0.136	0.049	0.079
HMDB59712	3-HYDROXYBENZYL ALCOHOL	C7 H8 O2		-0.039	-0.056	-0.004	-0.104	-0.158	0.004	-0.138	-0.048	0.111	0.136	0.049	0.079
-----	TRYPTOPHAN D5	C11 H7 D5 N2 O2		-0.039	-0.056	-0.004	-0.104	-0.158	0.004	-0.138	-0.048	0.111	0.136	0.049	0.079
HMDB00954	FERULATE	C10 H10 O4		-0.039	-0.056	-0.004	-0.104	-0.158	0.004	-0.138	-0.048	0.111	0.136	0.049	0.079
HMDB00486	7-HYDROXYOCTANOATE	C8 H16 O3		-0.039	-0.056	-0.004	-0.104	-0.158	0.004	-0.138	-0.048	0.111	0.136	0.049	0.079
HMDB01336	3,4-DIHYDROXYPHENYLACETATE-2	C8 H8 O4		-0.039	-0.056	-0.004	-0.104	-0.158	0.004	-0.138	-0.048	0.111	0.136	0.049	0.079
-	10-HYDROXYDECANOATE	C10 H20 O3		-0.039	-0.056	-0.004	-0.104	-0.158	0.004	-0.138	-0.048	0.111	0.136	0.049	0.079
HMDB01895	SALICYLATE	C7 H6 O3		-0.039	-0.056	-0.004	-0.104	-0.158	0.004	-0.138	-0.048	0.111	0.136	0.049	0.079
HMDB00784	AZELATE	C9 H16 O4		-0.039	-0.056	-0.004	-0.104	-0.158	0.004	-0.138	-0.048	0.111	0.136	0.049	0.079
HMDB00888	undecanedioic acid	C11 H20 O4		-0.039	-0.056	-0.004	-0.104	-0.158	0.004	-0.138	-0.048	0.111	0.136	0.049	0.079
HMDB02059	OMEGA-HYDROXYDODECANOATE	C12 H24 O3		-0.039	-0.056	-0.004	-0.104	-0.158	0.004	-0.138	-0.048	0.111	0.136	0.049	0.079
HMDB00220	PALMITATE	C16 H32 O2		-0.039	-0.056	-0.004	-0.104	-0.158	0.004	-0.138	-0.048	0.111	0.136	0.049	0.079
HMDB04437	DIETHANOLAMINE	C4 H11 N O2		-0.039	-0.056	-0.004	-0.104	-0.158	0.004	-0.138	-0.048	0.111	0.136	0.049	0.079
HMDB00448	ADIPATE	C6 H10 O4		-0.039	-0.056	-0.004	-0.104	-0.158	0.004	-0.138	-0.048	0.111	0.136	0.049	0.079
HMDB00423	3,4-Dihydroxyhydrocinnamic acid	C9 H10 O4		-0.039	-0.056	-0.004	-0.104	-0.158	0.004	-0.138	-0.048	0.111	0.136	0.049	0.079
-----	PUTRESCINE-NH3	C4 H9 N		-0.037	-0.02	-0.026	-0.016	-0.064	0.016	-0.104	-0.034	0.065	0.064	-0.047	0.045
HMDB00300	URACIL	C4 H4 N2 O2		-0.024	-0.039	-0.056	0.04	-0.077	0.054	-0.033	-0.05	-0.029	0.141	-0.011	0.057
HMDB01397	Guanosine monophosphate	C10 H14 N5 O8 P		-0.019	-0.151	-0.163	-0.055	0.064	0.033	0.014	0.082	-0.014	0.264	-0.087	-0.017
HMDB00224	ETHANOLAMINE PHOSPHATE	C2 H8 N O4 P		0.015	-0.008	-0.011	-0.012	-0.014	-0.031	-0.004	0.049	-0.004	0.038	0.003	0.003
HMDB00732	HYDROXYKYNURENINE	C10 H12 N2 O4		0.0285	-0.0275	-0.0375	-0.0305	-0.0085	-0.0855	-0.0955	0.0385	0.0395	0.1175	0.0045	-0.0045
HMDB00996	3-SULFINOALANINE	C3 H7 N O4 S		0.011	-0.021	-0.026	0.001	0.017	-0.016	-0.006	0.017	0.01	0.061	-0.012	0.017
HMDB01431	PYRIDOXAMINE	C8 H12 N2 O2		0.004	-0.471	-0.539	0.08	0.088	0.38	-0.1	-0.016	-0.004	0.264	-0.01	-1.667
HMDB61881	4-ACETYLBUTYRATE	C6 H10 O3		0.31	-0.062	0.182	0.123	0.052	0.045	-1.861	-0.045	-0.352	-0.156	0.089	-1.644
HMDB00030	BIOTIN	C10 H16 N2 O3 S		0.031	0.008	-0.008	0.22	0.167	0.121	-0.19	-0.061	0.057	0.154	0.037	-0.024
HMDB00285	Uridine-5'-triphosphate	C9 H15 N2 O15 P3		0.1055	0.0705	0.0905	0.2415	0.2805	-0.2305	-0.1645	-0.3375	-0.2665	-0.0925	-0.0005	0.0005
HMDB00766	N-ACETYLALANINE	C5 H9 N O3		-0.0265	-0.0225	-0.0305	-0.0205	0.0535	0.0065	-0.0915	0.0695	0.0145	0.0335	-0.0165	0.0185
HMDB00232	QUINOLINATE	C7 H5 N O4		-0.095	0.034	-0.023	-0.11	0.001	-0.001	0.143	0.067	0.082	-0.086	0.086	0.18
HMDB00296	URIDINE	C9 H12 N2 O6		0.0035	0.0235	0.0205	-0.2035	0.0415	-0.0865	-0.0985	-0.0035	0.0265	0.0925	0.1385	0.2515
-	NICOTINAMIDE HYPOXANTHINE DINUCLEOTIDE	C21 H26 N6 O15 P2		0.118	0.136	-0.008	-0.171	-0.06	0.158	-0.005	0.01	0.047	-0.067	-0.017	0.045
HMDB00805	OXOPROLINE	C5 H7 N O3		0.0985	0.0025	0.0045	0.0165	-0.0265	0.0925	0.0045	0.1005	0.0925	-0.1165	-0.1875	-0.1195
HMDB00812	N-ACETYLASPARTATE	C6 H9 N O5		0.063	-0.009	-0.022	0.106	0.109	0.071	0.012	0.049	0.009	-0.168	-0.158	-0.126
HMDB00905	DEOXYADENOSINE MONOPHOSPHATE	C10 H14 N5 O6 P		-0.083	0.136	-0.036	-0.088	0.076	0.113	-0.063	0.063	0.007	-0.16	-0.251	-0.137
HMDB00426	CITRAMALATE	C5 H8 O5		0.0365	0.0245	-0.0255	0.0045	-0.0045	0.0625	-0.0215	-0.0145	0.0055	0.0465	-0.0135	-0.0335
HMDB03345	ALPHA-D-GLUCOSE	C6 H12 O6		0.006	0.073	0.138	0.019	0.025	-0.237	-0.177	-0.54	-0.021	-0.002	0.321	0.299
HMDB01273	Guanosine-5'-triphosphate	C10 H16 N5 O14 P3		-0.0535	-0.1615	-0.3045	0.3255	-0.0165	-0.0225	-0.0685	0.1255	0.0915	0.0165	-0.1725	0.0885
HMDB01201	Guanosine diphosphate	C10 H15 N5 O11 P2		0.0415	0.0175	0.0205	0.1555	0.1345	-0.0435	-0.0425	-0.0315	-0.0135	0.0465	-0.1085	-0.1065
HMDB00538	Adenosine triphosphate	C10 H16 N5 O13 P3		0.1075	0.0645	0.0705	0.2715	0.0825	-0.1035	-0.1145	-0.0635	0.0045	-0.0045	-0.0375	-0.0045
HMDB01440	Deoxyguanosine triphosphate	C10 H16 N5 O13 P3		0.1075	0.0655	0.0705	0.2725	0.0845	-0.1035	-0.1145	-0.0645	0.0045	-0.0045	-0.0385	-0.0045
HMDB00001	1-METHYL-L-HISTIDINE	C7 H11 N3 O2		0.0195	0.0585	0.0755	-0.0425	-0.0355	-0.0335	-0.0045	0.0365	0.1085	0.0655	-0.0095	0.0045
HMDB00991	DL-2-AMINOCTANOATE	C8 H17 N O2		0.013	-0.006	-0.001	0.046	-0.027	-0.056	0.037	0.014	0.114	0.018	-0.041	-0.033
HMDB02005	METHIONINE SULFOXIDE	C5 H11 N O3 S		0.036	0.026	0.035	0.076	0.252	0.087	-0.238	-0.302	-0.176	-0.057	-0.005	-0.036
HMDB02024	4-IMIDAZOLEACETATE	C5 H6 N2 O2		-0.033	-0.014	0.057	0.071	0.145	0.218	-0.283	-0.116	-0.118	0.145	-0.04	0.076
-	LUMICHROME	C12 H10 N4 O2		-0.0735	-0.0085	-0.0425	0.0735	0.0595	0.0395	-0.3075	-0.1395	-0.0855	0.0675	0.0015	-0.0005
HMDB02205	HOMOCYSTEIC	C4 H9 N O5 S		-0.0525	-0.0665	-0.0555	0.0075	0.0485	0.0165	-0.6925	-0.6145	-0.5305	0.1055	-0.0395	0.0025
HMDB00122	HEXOSE	C6 H12 O6		0.025	-0.002	-0.014	0.007	0.002	-0.046	-0.182	-0.166	-0.192	0.134	0.106	0.085
HMDB00089	CYTIDINE	C9 H13 N3 O5		0.0235	0.0035	-0.0045	-0.0225	-0.0145	0.0045	-0.0775	-0.0305	-0.0365	0.0465	0.0295	-0.0035
HMDB00086	GLYCEROPHOSPHOCHOLINE	C8 H20 N O6 P		0.0285	-0.0015	-0.0085	0.0155	0.0165	-0.0075	-0.0285	-0.0165	-0.0535	0.0385	0.0205	0.0015
HMDB00230	N-ACETYLNEURAMINATE	C11 H19 N O9		0.0025	-0.0025	0.0115	0.0545	0.0245	0.0455	-0.0855	-0.0305	-0.0665	0.0685	-0.0565	-0.0345
HMDB00161	L-ALANINE	C3 H7 N O2		0.032	0.004	0.01	0.072	-0.004	0.089	-0.126	-0.121	-0.183	0.055	-0.026	-0.039
HMDB06483	ASPARTATE	C4 H7 N O4		0.058	0.031	0.022	0.097	-0.022	0.091	-0.102	-0.118	-0.206	0.068	-0.024	-0.056
HMDB00062	L-CARNITINE	C7 H15 N O3		0.016	0.001	0.004	0.023	-0.023	-0.006	-0.012	-0.043	-0.065	0.032	-0.006	0.011
HMDB13130	GLUTARYLCARNITINE	C12 H21 N O6		-0.023	0.014	0.042	0.141	-0.171	0.13	-0.368	-0.241	-0.18	0.23	-0.014	-0.042
HMDB04825	P-OCTOPAMINE	C8 H11 N O2		0.005	-0.055	0.052	-0.032	0.134	0.112	-0.481	-2.286	-2.127	0.102	0.155	0.011
HMDB00714	HIPPURATE	C9 H9 N O3		0.0295	-0.0005	0.0005	0.0115	0.2005	0.1225	-0.1335	-0.1185	-0.2965	-0.0305	0.0205	0.1035
0	3-METHYL-2-OXINDOLE	C9 H9 N O		0.046	0.005	0.043	-0.006	0.264	0.115	-1.026	-0.636	-1.086	0.184	-0.005	0.196
HMDB03357	N-ACETYLORNITHINE	C7 H14 N2 O3		-0.013	-0.029	-0.015	0.121	0.141	0.054	-0.379	-0.237	-0.471	0.115	0.049	0.013
HMDB00875	TRIGONELLINE	C7 H7 N O2		-0.02	-0.138	-0.052	0.05	0.035	0.05	-0.522	-0.723	-1.019	0.049	0.148	0.118
HMDB03464	4-GUANIDINOBUTANOATE	C5 H11 N3 O2		-0.0145	-0.0155	-0.0015	0.0645	0.0885	0.0485	-0.2935	-0.3085	-0.6385	0.1485	0.0895	0.1345
HMDB00210	PANTOTHENATE	C9 H17 N O5		0.025	-0.017	-0.043	0.08	0.006	0.016	-0.136	-0.103	-0.148	0.056	0.007	-0.006
HMDB00052	ARGININOSUCCINATE	C10 H18 N4 O6		-0.0045	0.0875	0.1265	0.0455	0.0245	0.0785	-0.4025	-0.2885	-0.2525	0.0045	-0.1655	-0.0065
HMDB00517	ARGININE	C6 H14 N4 O2		0.0055	-0.0055	0.0125	-0.0055	-0.0365	0.0825	-0.4075	-0.2315	-0.1145	0.0085	0.0195	0.0495
HMDB31647	2-PROPENOATE	C3 H4 O2		0.0925	-0.0035	0.0035	0.0185	-0.1775	0.1765	-0.3755	-0.3505	0.0595	0.1345	-0.0545	0.0815
HMDB01370	DIAMINOPIMELATE	C7 H14 N2 O4		0.062	0.007	-0.009	-0.007	0.008	0.082	-0.109	-0.196	0.034	0.08	0.02	-0.023
HMDB00271	SARCOSINE	C3 H7 N O2		-0.0005	0.0135	0.0225	0.0005	-0.0555	0.0335	-0.1145	-0.1725	-0.0345	0.0415	0.0535	0.0575
HMDB03157	GUANIDINOSUCCINATE	C5 H9 N3 O4		-0.0075	0.0075	0.0545	-0.0195	-0.1115	0.0105	-0.2215	-0.1675	-0.0875	0.1665	0.1385	0.1235
HMDB00446	N-ALPHA-ACETYLLYSINE	C8 H16 N2 O3		-0.0065	-0.0315	-0.0135	0.0475	-0.0375	0.0195	-0.0985	-0.0725	-0.0325	0.1625	0.0795	0.0515
HMDB04620	N-a-Acetyl-L-arginine	C8 H16 N4 O3		-0.1265	-0.0165	0.0215	0.0145	-0.0335	0.0195	-0.1285	-0.0195	-0.0215	0.1585	0.0705	0.1025
HMDB03072	QUINATE	C7 H12 O6		0.0625	-0.0285	0.0085	0.0905	-0.1305	0.1705	-0.0535	-0.1415	-0.0345	0.2035	0.1575	0.0785
HMDB13205	decenoylcarnitine	C17 H31 N O4		-0.021	-0.001	0.153	0.246	-0.018	0.014	-0.161	-0.315	-0.088	0.077	0.08	0.032
HMDB00824	PROPIONYLCARNITINE	C10 H19 N O4		0.022	-0.004	0.003	0.041	0.023	-0.003	-0.061	-0.01	-0.074	0.086	0.055	0.028
HMDB29942	ARABINOSE	C5 H10 O5		0.0015	-0.0015	-0.0055	0.0625	0.0975	0.0485	-0.0555	-0.0295	-0.0315	0.0825	0.0635	0.0715
HMDB00050	ADENOSINE	C10 H13 N5 O4		0.0015	-0.0125	0.0155	0.2205	-0.0115	0.1855	-0.1165	-0.1835	-0.1525	0.0875	0.1635	0.0065
HMDB13305	PROPIONYLCHOLINE	C8 H17 N O2		-0.147	-0.172	-0.18	0.124	-0.033	0.082	-0.091	-0.074	-0.118	0.132	0.204	0.191
HMDB01173	METHYLTHIOADENOSINE	C11 H15 N5 O3 S		-0.024	-0.039	0.015	0.007	-0.023	0.013	-0.016	-0.084	-0.1	0.158	0.038	0.142
HMDB00221	NADPH	C21 H30 N7 O17 P3		-0.0635	0.0415	-0.1165	-0.0575	-0.0115	0.0185	-0.0315	-0.0335	0.0285	0.1615	0.0805	0.0695
HMDB00055	CELLOBIOSE	C12 H22 O11		0.094	0.151	0.379	-0.118	-0.133	-0.069	-0.151	-0.005	0.103	0.499	0.347	0.374
HMDB00177	HISTIDINE	C6 H9 N3 O2		0.0195	0.0065	-0.0215	-0.0965	-0.1445	-0.0505	-0.0235	-0.0825	-0.0095	0.0485	0.0385	0.0825
HMDB00134	FUMARATE	C4 H4 O4		-0.001	-0.005	0.005	-0.096	-0.064	-0.053	-0.029	-0.005	0.045	0.012	0.014	0.064
HMDB03355	5-AMINOPENTANOATE	C5 H11 N O2		-0.0285	-0.0165	0.0005	-0.0515	-0.0445	-0.0905	-0.0075	-0.0775	-0.0755	0.0945	0.0365	0.0165
HMDB00172	ISOLEUCINE	C6 H13 N O2		0.0015	-0.0205	-0.0185	-0.0015	-0.0235	-0.0515	-0.0275	-0.0325	-0.0135	0.0595	0.0555	0.0555
HMDB00150	GLUCONOLACTONE	C6 H10 O6		0.049	0.028	0.034	-0.135	-0.113	-0.12	-0.124	-0.092	-0.079	0.062	0.043	0.02
HMDB03349	DIHYDROOROTATE	C5 H6 N2 O4		0.366	0.361	0.347	-0.698	-0.662	-0.707	-0.56	-0.522	-0.593	0.388	0.403	0.329
HMDB00235	THIAMINE	C12 H17 N4 O S		0.014	0.048	0.05	-0.048	-0.084	-0.027	-0.034	-0.073	-0.049	0.075	0.068	0.078
HMDB03349	Dihydroorotic acid	C5 H6 N2 O4		0.367	0.354	0.357	-1.163	-1.076	-2.627	-0.725	-0.646	-0.88	0.425	0.436	0.352
HMDB01161	DEOXYCARNITINE	C7 H15 N O2		0.0015	0.0085	0.0235	0.0025	-0.0395	-0.0355	-0.0635	-0.0475	-0.0375	0.0245	0.0235	-0.0015
HMDB00070	PIPECOLATE	C6 H11 N O2		-0.006	-0.012	0.006	0.045	-0.01	-0.083	-0.048	-0.021	0.026	0.122	0.058	0.006
HMDB00902	NAD+	C21 H27 N7 O14 P2		0.055	0.036	0.048	-0.03	0.023	-0.324	0.008	-0.213	-0.229	0.099	-0.008	-0.073
HMDB00045	ADENOSINE-MONOPHOSPHATE	C10 H14 N5 O7 P		0.029	0.013	0	0.006	0	-0.041	0.071	0.008	-0.049	-0.007	0.008	-0.006
HMDB00201	O-ACETYLCARNITINE-1	C9 H17 N O4		0.0095	-0.0035	-0.0015	0.0535	0.0095	0.0015	0.0565	-0.0115	-0.0035	-0.0225	0.0355	0.0195
HMDB00043	BETAINE	C5 H11 N O2		-0.003	0.005	0.016	-0.032	0.022	-0.03	0.096	-0.038	-0.067	0.003	0.115	0.07
HMDB00251	TAURINE	C2 H7 N O3 S		0.0055	-0.0005	0.0005	-0.0055	-0.0065	-0.0265	0.0395	-0.0145	-0.0195	0.0465	0.0575	0.0515
HMDB00162	PROLINE	C5 H9 N O2		-0.018	0.004	0.002	-0.007	0.003	-0.014	0.107	-0.015	-0.068	-0.053	0.048	0.046
HMDB00159	PHENYLALANINE	C9 H11 N O2		0.025	-0.002	0.002	0.025	0.046	-0.026	-0.007	-0.008	-0.027	-0.028	0.029	0.015
HMDB00687	LEUCINE	C6 H13 N O2		0.0055	-0.0285	-0.0195	0.0125	0.0465	-0.0095	-0.0385	-0.0505	-0.0505	0.0345	0.0385	0.0525
HMDB00124	FRUCTOSE 6-PHOSPHATE	C6 H13 O9 P		-0.0605	-0.0135	-0.0335	-0.1075	0.0805	-0.0625	-0.1905	-0.0665	0.0185	0.0135	-0.0385	0.0685
HMDB01068	Sedoheptulose 7-phosphate	C7 H15 O10 P		0.014	-0.037	-0.023	-0.102	-0.006	-0.04	-0.159	0.011	0.011	0.067	0.032	0.112
HMDB01068	SEDOHEPTULOSE-7-PHOSPHATE	C7 H15 O10 P		0.0255	-0.0055	-0.0015	-0.0905	0.0895	-0.0605	-0.1505	0.0605	0.0115	0.0705	0.0015	0.1105
HMDB01401	GLUCOSE 6-PHOSPHATE	C6 H13 O9 P		0.022	-0.013	-0.007	-0.057	0.104	-0.029	-0.298	-0.215	-0.061	0.06	0.03	0.1
HMDB01127	6-Phosphonoglucono-D-lactone	C6 H11 O9 P		0.003	-0.023	-0.001	-0.147	0.095	0.001	-0.412	-0.044	0.04	0.112	0.063	0.165
HMDB01321	ERYTHROSE-4-PHOSPHATE	C4 H9 O7 P		0.017	-0.019	0.002	-0.083	0.096	-0.066	-0.236	-0.075	0.036	0.104	-0.002	0.13
HMDB01316	6-PHOSPHOGLUCONATE	C6 H13 O10 P		-0.159	-0.004	0.009	-0.258	0.128	0.026	-0.382	-0.049	-0.028	0.033	0.051	0.154
HMDB01316	6-Phosphogluconic acid	C6 H13 O10 P		0.003	-0.067	-0.038	0.016	0.161	0.089	-0.2	-0.003	-0.006	0.151	0.038	0.13
0	BIS(2-ETHYLHEXYL)PHTHALATE	C24 H38 O4		-0.107	-0.124	-0.072	-0.172	3.176	-0.064	3.245	-0.116	0.043	3.218	-0.019	0.011
HMDB00290	URIDINE DIPHOSPHATE-N-ACETYLGLUCOSAMINE	C17 H27 N3 O17 P2		-0.134	-0.151	-0.099	3.742	-0.253	-0.091	3.834	-0.143	0.016	0.041	-0.046	-0.016
HMDB02434	HYDROQUINONE	C6 H6 O2		0.2775	0.1195	-0.0935	0.1335	0.1595	0.3695	0.0935	-0.1985	-1.9895	-0.1485	-2.0515	0.1865
HMDB41683	4-Hydroxyphenyl-2-propionic acid	C9 H10 O3		0.287	0.975	1.255	0.576	-0.619	-0.457	1.306	1.089	-0.35	-0.325	-0.412	1.161
HMDB00607	CYANOCOBALAMIN	C63 H89 Co N14 O14 P		0.2365	-0.0675	0.0525	-0.4865	-0.2425	-0.1785	-0.2915	0.0275	-1.7165	0.2625	0.2305	-0.0275
HMDB00292	XANTHINE-2	C5 H4 N4 O2		-0.0005	-0.0065	-0.0055	-0.1065	-0.0135	0.0285	0.0435	0.0665	0.0425	-0.1535	-0.0695	-0.0635
HMDB00299	XANTHOSINE	C10 H12 N4 O6		-0.0125	-0.0125	0.0125	-0.2125	0.0215	-0.0595	-0.0185	0.0715	0.1565	-0.1595	-0.1025	0.0335
HMDB01517	AICAR	C9 H15 N4 O8 P		0.0335	0.0005	-0.0665	-0.1415	0.0295	-0.0405	0.1045	0.0445	0.1425	-0.2135	-0.0335	0.1415
HMDB00289	URATE	C5 H4 N4 O3		0.002	0.001	-0.001	-0.118	0.022	-0.089	0.145	-0.014	0.048	-0.215	-0.002	0.062
HMDB00190	LACTATE	C3 H6 O3		0.0165	-0.0245	-0.0315	-0.0115	0.0415	-0.1045	0.0505	0.0255	0.0175	-0.1445	0.0235	0.0015
HMDB00133	GUANOSINE	C10 H13 N5 O5		-0.0115	-0.0125	-0.0125	-0.1075	-0.1555	0.0295	0.0605	0.0665	0.0625	-0.1125	0.0115	-0.0865
HMDB00133	Guanosine	C10 H13 N5 O5		0.004	-0.041	-0.024	-0.106	-0.166	-0.004	0.046	0.076	0.077	-0.063	0.005	-0.012
HMDB01406	NICOTINAMIDE-1	C6 H6 N2 O		-0.048	-0.002	-0.001	-0.021	-0.143	-0.009	0.054	0.054	0.001	-0.026	0.008	0.035
-----	Hypoxanthine-3	C5 H4 N4 O		0.0115	0.0065	0.0225	-0.1245	-0.1135	0.0045	-0.0395	0.1275	0.0165	-0.1095	0.0285	-0.0045
HMDB00273	Thymidine	C10 H14 N2 O5		-0.099	-0.06	-0.063	-0.177	-0.159	0.021	-0.01	0.023	0.047	-0.187	0.064	-0.11
HMDB00273	THYMIDINE	C10 H14 N2 O5		-0.023	-0.023	-0.01	-0.059	-0.066	0.035	0.001	-0.034	0.022	-0.111	0.042	-0.083
HMDB00292	XANTHINE-1	C5 H4 N4 O2		-0.1695	-0.0435	-0.0035	-0.2045	-0.0605	0.0715	0.0595	0.0965	0.0055	-0.1535	0.0035	-0.0065
HMDB00157	HYPOXANTHINE	C5 H4 N4 O		0.02	-0.011	-0.001	-0.089	-0.029	0.033	-0.031	0.104	0.004	-0.058	0.028	0.001
HMDB00195	INOSINE	C10 H12 N4 O5		0.0415	0.0165	-0.0005	-0.1195	-0.0235	0.0945	-0.0785	0.0595	-0.0215	-0.0855	0.0325	-0.0315
HMDB00195	Inosine	C10 H12 N4 O5		0.0185	-0.0145	-0.0115	-0.1515	-0.0795	0.0985	-0.0995	0.0555	0.0115	-0.0975	0.0265	-0.0405
HMDB01548	D-RIBOSE 5-PHOSPHATE	C5 H11 O8 P		0.0185	-0.0035	-0.0065	-0.0525	0.0365	0.0435	-0.0945	0.0035	0.0135	-0.0365	0.0285	0.0115
HMDB00574	CYSTEINE	C3 H7 N O2 S		-0.0125	0.0145	0.0725	-0.4575	-0.2625	0.0125	-0.2365	0.0605	0.1165	-0.1055	-0.0955	0.0515
HMDB01890	N-ACETYLCYSTEINE	C5 H9 N O3 S		-0.0395	-0.0155	0.0095	-0.2245	-0.0425	-0.0265	-0.2175	0.0275	-0.0035	0.0035	-0.0605	0.0035
HMDB03331	1-METHYLADENOSINE	C11 H15 N5 O4		-0.02	-0.033	-0.018	-0.19	0.055	0.047	-0.061	0.192	0.007	-0.007	-0.203	0.117
HMDB00118	HOMOVANILLATE	C9 H10 O4		-0.003	-0.256	-0.492	-2.022	-0.027	0.003	-0.007	0.175	0.299	0.06	-1.869	0.09
HMDB00244	RIBOFLAVIN	C17 H20 N4 O6		-0.103	0.138	0.001	-0.223	0.043	-0.075	-0.016	0.011	0.041	-0.066	-0.06	0.095
HMDB01066	Lactoylglutathione	C13 H21 N3 O8 S		-0.1015	0.1305	-0.0045	0.0245	0.0215	-0.0365	-0.0815	-0.0215	0.0025	-0.1495	-0.1665	-0.0025
0	O-SUCCINYL-HOMOSERINE	C8 H13 N O6		-0.2195	0.0075	-0.0885	-0.0045	0.0095	0.0015	-0.1125	0.1235	0.1245	-0.0595	-0.1015	-0.0015
HMDB06355	D-GLUCURONOLACTONE	C6 H8 O6		-0.0785	-0.0875	-0.0875	0.0185	-0.0235	-0.0095	0.0665	0.0135	0.0515	-0.0365	-0.0635	-0.0545
HMDB00286	URIDINE DIPHOSPHATE GLUCOSE	C15 H24 N2 O17 P2		-3.9095	-3.9265	-3.8745	0.0555	0.0095	-0.0625	0.2435	-0.0095	-0.3315	-0.5245	-0.1445	-0.1015
HMDB00201	O-ACETYLCARNITINE-2	C9 H17 N O4		-0.2955	-0.2525	-0.2495	0.0155	-0.0455	-0.0275	0.0665	-0.0345	0.0165	0.0225	0.1315	0.1125
HMDB01248	FAD	C27 H33 N9 O15 P2		-1.4245	-1.4415	-1.3895	-1.4895	1.4495	1.2895	1.8895	1.2575	-1.2745	-1.2495	-1.3365	1.7025
HMDB03337	OXIDIZED GLUTATHIONE	C20 H32 N6 O12 S2		-0.2765	-0.1515	0.0535	0.0075	0.0825	-0.0245	0.1215	0.0545	-0.0135	-0.1305	-0.0495	-0.0075
HMDB01413	CITICOLINE	C14 H26 N4 O11 P2		-0.065	-0.174	0.039	-0.109	0.073	-0.166	0.116	0.088	0.057	-0.111	-0.149	0.092
HMDB01564	CDP-ETHANOLAMINE	C11 H20 N4 O11 P2		-0.061	-0.042	0.026	-0.069	0.214	-0.032	0.249	0.078	0.014	-0.066	-0.053	0.053
HMDB02035	4-COUMARATE	C9 H8 O3		-0.0645	0.0095	-0.0095	0.0515	0.1075	0.0345	0.0925	-0.1875	-0.1015	-0.1315	0.1305	-0.1795
HMDB00158	TYROSINE	C9 H11 N O3		-0.0335	-0.0005	-0.0255	0.0025	0.0565	0.0055	0.0575	-0.0225	-0.0045	-0.0425	-0.0045	-0.0625
HMDB00696	METHIONINE-2	C5 H11 N O2 S		0.022	-0.005	0.005	0.024	0.102	0.036	-0.041	-0.03	-0.05	-0.083	-0.028	-0.034
HMDB00696	METHIONINE-1	C5 H11 N O2 S		0.0015	0.0135	0.0325	-0.0075	0.0235	0.0185	-0.0045	-0.0455	-0.0335	-0.0605	0.0035	-0.0195
HMDB03333	8-HYDROXY-DEOXYGUANOSINE	C10 H13 N5 O5		-0.107	-0.124	-0.072	1.534	1.627	-0.064	-0.206	1.169	0.043	0.068	-0.019	0.011
HMDB00064	CREATINE	C4 H9 N3 O2		0.018	0.001	-0.005	0.049	0.038	-0.001	0.044	0.047	-0.015	-0.009	-0.005	-0.036
HMDB00703	MANDELATE	C8 H8 O3		0.1515	-1.9175	-1.8655	0.1835	0.1015	0.0895	0.0965	-0.4225	0.0505	-1.7255	-1.8125	-1.7825
HMDB00267	PYROGLUTAMATE	C5 H7 N O3		0.026	0.03	0.019	-0.086	-0.183	0.229	0.006	0.098	-0.012	-0.133	-0.136	-0.112
HMDB00301	UROCANATE	C6 H6 N2 O2		0.078	0.115	0.141	0.136	-0.136	0.505	-0.068	-0.256	-0.167	-0.25	-0.221	-0.272
HMDB00214	L-ORNITHINE	C5 H12 N2 O2		0.0235	0.0055	-0.0315	0.0485	-0.0705	0.1775	0.0515	-0.0955	-0.0165	-0.1165	-0.0055	-0.0785
HMDB00214	Ornithine	C5 H12 N2 O2		0.0095	-0.0245	0.0045	0.0425	-0.0975	0.1765	0.0515	-0.1565	-0.0585	-0.1715	0.0295	-0.0115
HMDB00085	DEOXYGUANOSINE	C10 H13 N5 O4		-0.0025	-0.0325	0.0025	0.0885	-0.4195	0.0565	-2.6885	0.1645	0.0595	-2.4145	-0.5515	-2.4715
HMDB00071	DEOXYINOSINE	C10 H11 N4 Na O4		0.003	-0.035	-0.003	0.006	-0.059	0.065	-0.26	0.104	0.064	-0.249	-0.095	-0.141
HMDB00707	4-HYDROXYPHENYLPYRUVATE	C7 H6 O2		-0.0235	0.0145	-0.0015	0.1285	-0.0345	0.1095	-0.1565	-0.0865	0.0015	-2.2815	-0.3375	-1.0585
HMDB11718	4-HYDROXYBENZALDEHYDE	C7 H6 O2		-0.0855	0.0305	-0.0055	0.1385	-0.0545	0.1195	-0.1405	-0.0715	0.0055	-2.2755	-0.2755	-0.8725
HMDB00684	KYNURENINE	C10 H12 N2 O3		0.0175	-0.0315	-0.0025	0.0485	-0.0095	0.0025	-0.0295	0.0525	0.0195	-0.0735	-0.0485	-0.0945
HMDB01067	N-ACETYLASPARTYLGLUTAMATE	C11 H16 N2 O8		-0.0215	-0.0375	-0.0305	0.0315	0.0075	0.1495	0.0165	-0.2065	0.1465	-0.1295	-0.1795	-0.2815
HMDB00500	4-HYDROXYBENZOATE	C7 H6 O3		0.02	0.003	-0.057	0.083	-0.082	0.099	0.049	-0.03	0.046	-0.215	-0.157	-0.312
HMDB01257	SPERMIDINE	C7 H19 N3		0.0095	-0.0385	-0.0355	-0.0025	-0.0135	-0.0095	-0.0345	0.0035	-0.0245	0.0085	-0.0215	-0.0385
HMDB00625	GLUCONATE	C6 H12 O7		0.0065	-0.0055	0.0005	0.0075	0.0255	-0.0345	-0.0635	-0.0015	-0.0665	-0.0665	-0.0865	-0.1225
HMDB03466	L-GULONOLACTONE	C6 H10 O6		0.0535	-0.0205	0.0695	-0.0275	0.0075	-0.0185	-0.0575	0.0305	-0.0165	-0.0105	-0.1325	-0.0215
HMDB00125	GLUTATHIONE REDUCED	C10 H17 N3 O6 S		0.1735	0.0195	-0.0025	0.0565	0.0235	0.0015	-0.0255	0.0045	-0.0775	0.0095	-0.0275	-0.0585
HMDB00045	Adenosine monophosphate	C10 H14 N5 O7 P		0.0315	0.0055	0.0065	0.0035	0.0205	-0.0035	-0.0925	-0.0445	-0.1115	0.0225	-0.0605	-0.0565
HMDB01406	NICOTINAMIDE-2	C6 H6 N2 O		0.0895	-0.0155	-0.0265	-0.0115	-0.0425	0.0255	0.0015	0.0675	-0.0055	-0.0205	-0.0015	-0.0205
HMDB00779	PHENYLLACTATE	C9 H10 O3		-0.0305	0.0005	0.0215	0.0165	0.2595	-0.0075	0.0765	-0.0005	-0.0455	-0.1045	0.0675	0.0825
HMDB37115	2-HYDROXY-4-(METHYLTHIO)BUTANOATE	C5 H10 O3 S		0.019	0.02	-0.011	0.018	0.27	0.046	-0.07	-0.033	0.005	-0.109	-0.037	-0.005
HMDB01870	BENZOATE	C7 H6 O2		-0.198	2.108	2.094	-0.263	1.875	1.812	2.093	-0.207	-0.048	-0.023	1.697	2.259
HMDB00619	CHOLATE	C24 H40 O5		-0.0655	0.2705	0.1515	-0.3275	0.2515	0.4675	0.2435	0.2205	-1.9295	-1.9045	0.3465	-0.0005
HMDB00946	URSODEOXYCHOLATE	C24 H40 O4		-0.393	-0.101	0.253	-0.544	0.433	0.367	0.502	0.283	-0.198	0.048	0.185	-0.019
HMDB00626	DEOXYCHOLATE	C24 H40 O4		-0.1085	-0.0075	0.3525	-2.2015	-0.1035	0.2345	0.6535	0.7715	0.3785	-1.9615	0.2055	0.1805
HMDB00902	BETA-NICOTINAMIDE ADENINE DINUCLEOTIDE	C21 H29 N7 O14 P2		-0.2295	-0.1055	0.0465	-0.3365	-0.1305	0.0065	0.0265	0.0845	0.1215	-0.1675	-0.0725	0.0535
HMDB01397	GUANOSINE MONOPHOSPHATE	C10 H14 N5 O8 P		-0.035	0.061	0.043	-0.122	0	-0.007	0.143	0.13	-0.016	-0.187	-0.067	0.022
HMDB00115	GLYCOLATE	C2 H4 O3		-0.023	0.023	0.032	-0.062	-0.069	-0.011	0.053	-0.039	0.036	-0.022	0.078	0.001
HMDB00262	THYMINE	C5 H6 N2 O2		0.009	0.006	-0.003	-0.14	-0.147	-0.098	0.16	-0.08	0.053	-0.084	0.266	0.166
HMDB00017	4-PYRIDOXATE	C8 H9 N O4		0.0085	0.0105	-0.0135	-0.0215	-0.0905	-0.0835	0.1585	0.0125	-0.0175	0.0265	0.1855	0.0815
HMDB00630	CYTOSINE	C4 H5 N3 O		-0.021	0.034	0.044	-0.063	-0.004	-0.095	0.127	0.016	-0.007	0.013	0.023	0.038
HMDB00651	decanoylcarnitine	C17 H33 N O4		-0.0055	-0.0315	-0.0055	0.0425	0.0215	-0.0645	0.1485	0.0125	0.0055	-0.0515	0.1355	0.0615
HMDB02666	THIAMINE MONOPHOSPHATE	C12 H17 N4 O4 P S		-0.0395	0.1425	0.1885	-0.1425	-0.3305	0.0725	-0.0585	-0.0765	0.0185	-0.0285	0.0745	0.1225
HMDB01185	S-ADENOSYLMETHIONINE	C15 H22 N6 O5 S		-0.0285	0.0885	0.1245	-0.0465	-0.1035	-0.0475	-0.0015	-0.0445	0.0015	-0.0805	0.0335	0.1585
HMDB00132	GUANINE-1	C5 H5 N5 O		-0.178	0.01	0.112	-0.142	0.014	-0.01	0.219	0.107	0.136	-0.109	-0.012	-0.095
HMDB00229	NICOTINAMIDE MONONUCLEOTIDE	C11 H15 N2 O8 P		-0.0575	-0.0395	-0.0105	0.0265	0.0235	0.0255	0.0995	0.0865	0.0095	-0.0055	-0.0475	-0.1025
HMDB00746	HYDROXYISOCAPROIC	C6 H12 O3		0.073	0.103	-0.139	0.087	0.054	-0.003	0.229	0.003	0.113	-0.015	-0.137	-0.191
HMDB36458	1-AMINOCYCLOPROPANECARBOXYLATE	C4 H7 N O2		-0.009	0.021	-0.07	0.062	-0.027	0.075	-0.058	-0.03	0.005	0.062	0.044	0.045
HMDB00288	URIDINE MONOPHOSPHATE	C9 H13 N2 O9 P		-0.041	0.012	-0.001	-0.052	0.069	0.033	-0.003	0.031	-0.086	0.061	0.085	0.128
HMDB00296	Uridine	C9 H12 N2 O6		0.0015	0.0025	0.0185	-0.1385	-0.0255	-0.0485	-0.0485	0.0005	0.0175	0.0345	0.1195	0.2035
HMDB00288	Uridine monophosphate	C9 H13 N2 O9 P		0.193	0.164	0.169	-0.036	0.121	-0.01	-0.124	-0.05	-0.118	0.182	0.222	0.125
HMDB00688	Isovalerylcarnitine	C12 H23 N O4		0	-0.011	-0.022	0.049	0.086	0	-0.014	-0.001	-0.099	0.058	0.028	0.061
HMDB11756	N-ACETYLLEUCINE	C8 H15 N O3		0.0065	-0.0155	-0.0025	0.0375	0.0055	0.0165	-0.0765	0.0025	-0.0505	0.0475	0.1385	0.0525
HMDB00512	N-ACETYLPHENYLALANINE	C11 H13 N O3		0.0005	-0.0205	-0.0355	0.0335	-0.0875	-0.0105	0.0125	0.0695	0.0305	0.0085	0.0955	-0.0005
HMDB13713	N-ACETYLTRYPTOPHAN	C13 H14 N2 O3		-0.04	0.005	0.033	0.093	-0.121	-0.01	0	0.043	-0.038	0.012	0.101	0
HMDB00958	TRANS-ACONITATE	C6 H6 O6		-0.101	0.048	0.015	-0.016	-0.004	-0.037	-0.02	0.004	0.058	0.057	0.08	0.035
HMDB00094	CITRATE	C6 H8 O7		-0.0335	-0.0755	-0.0505	0.0585	0.0515	0.0165	-0.0115	0.0335	0.0115	0.0485	0.0225	-0.0165
HMDB03681	4-ACETAMIDOBUTANOATE	C6 H11 N O3		-0.0095	0.0215	-0.0165	0.0395	0.1015	-0.0495	-0.0505	0.1165	0.1315	0.0775	-0.0065	0.0065
HMDB01491	PYRIDOXAL-PHOSPHATE	C8 H10 N O6 P		0.1335	-0.0415	-0.0125	-0.0345	0.0095	0.0305	0.0215	0.0845	0.0565	-0.1395	0.0195	-0.0095
HMDB00092	DIMETHYLGLYCINE	C4 H9 N O2		0.026	0.012	-0.001	-0.077	-0.022	-0.121	0.007	0.292	0.201	0.02	-0.136	-0.11
HMDB00008	2-HYDROXYBUTYRATE	C4 H8 O3		0.1545	0.0645	0.0685	-0.0315	-0.0295	-0.1985	0.2575	0.3455	0.2835	0.0135	-0.0135	-0.0425
HMDB05765	OPHTHALMATE-1	C11 H19 N3 O6		-0.022	0.064	0.046	-0.043	0.002	-0.002	0.034	0.192	0.257	-0.038	-0.212	-0.12
HMDB00562	CREATININE	C4 H7 N3 O		-0.003	0.013	0.034	0.003	-0.034	-0.02	0.021	0.04	0.033	-0.042	-0.076	-0.046
-	3-HYDROXYBENZALDEHYDE	C7 H6 O2		-0.024	0.006	0.031	-0.102	0.149	-0.069	0.167	0.046	0.139	-0.136	-0.006	-0.065
HMDB00755	HYDROXYPHENYLLACTATE	C9 H10 O4		0.0245	-0.0025	-0.0175	-0.0795	0.1325	-0.0635	0.1535	0.0795	0.0705	-0.1895	0.0025	-0.0555
HMDB00883	VALINE	C5 H11 N O2		0.0305	-0.0105	0.0035	-0.0105	-0.0315	0.0245	-0.0525	-0.0245	0.0115	-0.0035	0.0175	0.0295
HMDB00576	MONOETHYLMALONATE	C5 H8 O4		0.021	-0.001	-0.06	-0.057	-0.059	0.042	0.028	0.044	0.027	-0.008	-0.127	0.001
HMDB00622	ETHYLMALONATE	C5 H8 O4		-0.1435	-0.0735	0.0395	-0.0495	0.0955	0.0035	0.0645	0.1015	-0.0175	0.0145	-0.1825	-0.0035
HMDB00157	Hypoxanthine-1	C5 H4 N4 O		-0.063	-0.047	-0.038	0.026	-0.046	0.044	0.158	0.09	0.091	-0.057	0.015	-0.015
HMDB03243	ACETOIN	C4 H8 O2		0.003	-0.003	-0.122	0.051	0.021	-0.108	0.037	0.077	0.043	-0.151	-0.34	-0.249
HMDB00661	GLUTARATE	C5 H8 O4		0.0345	-0.0035	0.0005	0.0755	-0.0005	-0.0145	0.1035	0.2135	0.0405	-0.1845	-0.2515	-0.2105
HMDB00099	CYSTATHIONINE	C7 H14 N2 O4 S		0.025	-0.024	-0.004	0.004	0.167	-0.014	0.01	0.175	0.055	-0.201	-0.195	-0.092
HMDB02931	N-ACETYLSERINE	C5 H9 N O4		-0.0605	-0.1285	-0.0965	0.0795	0.1215	0.1165	0.0605	0.1535	0.0865	-0.1225	-0.2245	-0.1695
HMDB01336	3,4-DIHYDROXYPHENYLACETATE-1	C8 H8 O4		-0.0355	-0.0245	-0.0185	0.0325	0.1295	0.0435	0.0185	0.0635	0.0225	-0.1185	-0.1915	-0.1715
HMDB11745	N-ACETYLMETHIONINE	C7 H13 N O3 S		-0.0055	-0.0115	0.0195	0.0495	0.1555	0.0125	-0.0545	0.0645	0.0055	-0.0595	-0.0765	-0.0215
HMDB02013	Butyrylcarnitine	C11 H21 N O4		0.0035	-0.0035	0.0255	0.0655	0.1295	0.0085	-0.0325	0.0505	-0.0435	-0.0725	-0.0955	-0.0105
HMDB01138	N-ACETYLGLUTAMATE	C7 H11 N O5		0.011	0.009	-0.009	0.168	0.025	0.145	-0.163	-0.034	-0.052	0.044	-0.169	-0.123
HMDB00156	MALATE	C4 H6 O5		0.0685	0.0325	-0.0075	0.1385	0.1125	0.0815	-0.0115	0.0385	-0.0045	-0.0095	-0.0215	-0.0295
HMDB00012	DEOXYURIDINE	C9 H12 N2 O5		0	0	0.022	-0.034	0.166	-0.02	-0.124	0.018	0.02	0.018	-0.048	-0.03
HMDB01112	Glyceraldehyde 3-phosphate	C3 H7 O6 P		0.064	-0.17	-0.108	0.095	0.206	-0.048	-0.039	0.039	0.128	-0.144	-0.124	0.102
HMDB01149	5-AMINOLEVULINATE	C5 H9 N O3		0.017	-0.006	-0.008	0.006	0.057	-0.044	0.018	0.128	0.108	-0.056	-0.081	-0.087
HMDB00355	3-HYDROXYMETHYLGLUTARATE	C6 H10 O5		0.031	-0.002	-0.021	-0.013	0.067	0.002	0.092	0.14	0.014	-0.127	-0.087	-0.079
HMDB00182	LYSINE	C6 H14 N2 O2		0.0065	-0.0155	-0.0145	-0.0695	0.0075	-0.0865	0.1115	0.0495	0.0585	-0.0525	-0.0605	-0.0425
HMDB00167	THREONINE	C4 H9 N O3		0.018	-0.006	0.006	0.01	-0.045	-0.013	0.073	0.066	0.053	-0.045	-0.022	-0.044
HMDB00719	HOMOSERINE	C4 H9 N O3		0.049	-0.028	0.018	0.034	0.014	-0.054	0.056	0.001	-0.006	-0.102	-0.001	-0.11
HMDB00227	MEVALONATE	C6 H12 O4		-0.003	0.007	0.042	-0.024	-0.006	-0.02	0.008	0.014	0.118	-0.146	-0.047	-0.042
HMDB00956	TARTRATE	C4 H6 O6		0.109	0.045	0.077	-0.156	-0.179	-0.138	0.199	0.025	0.124	-0.132	-0.317	-0.22
HMDB00641	GLUTAMINE	C5 H10 N2 O3		0.0815	0.0365	0.0205	-0.1465	-0.2265	-0.0685	0.2595	0.2125	0.1695	-0.0205	-0.0715	-0.0955
HMDB00168	ASPARAGINE	C4 H8 N2 O3		0.011	0.003	-0.018	-0.006	0.013	-0.037	-0.028	-0.002	0.002	-0.03	-0.011	0.022
HMDB29881	SACCHARATE	C6 H10 O8		0.0295	-0.0245	-0.0005	-0.0335	0.0115	0.0035	-0.0165	0.0235	0.0365	0.0225	-0.0055	0.0005
HMDB01227	THYMIDINE-MONOPHOSPHATE	C10 H15 N2 O8 P		-0.078	0.011	0	-0.069	0.088	0.055	-0.073	0.078	0	-0.115	0.047	-0.049
HMDB03213	RAFFINOSE	C18 H32 O16		-0.0585	0.0475	0.0585	-0.0855	-0.0515	0.2535	-0.0765	0.1395	0.0685	-0.1945	0.2225	0.1035
HMDB03553	STACHYOSE	C24 H42 O21		-0.2245	-0.1055	0.0615	-0.0615	-0.1175	0.2315	-0.0475	0.3475	0.2735	-0.3795	0.0485	0.1795
HMDB00186	LACTOSE	C12 H22 O11		-0.133	0.009	0.013	-0.113	-0.147	0.024	-0.078	0.103	0.032	-0.104	0.046	0.054
HMDB00701	HEXANOYLGLYCINE	C8 H15 N O3		-0.081	0.016	0.068	0.113	-0.049	-1.666	-0.376	0.063	-0.068	0.194	0.292	0.16
HMDB00225	OXOADIPATE	C6 H8 O5		0.1305	0.0075	0.1245	-0.0075	0.2005	-2.0785	0.2915	0.0595	0.3535	0.1755	-0.1275	-0.0205
HMDB11600	3-METHYLADENINE	C6 H7 N5		0.0015	-0.0295	-0.0065	-0.0005	-0.0565	-0.1065	0.0825	0.0365	0.0505	0.0365	0.0265	0.0145
HMDB00019	ALPHA-KETOISOVALERATE	C5 H8 O3		-0.0235	-0.0115	0.0115	-0.0145	0.0495	-0.2735	0.1135	0.0435	0.1155	-0.0575	0.1405	0.0675
HMDB00491	3-METHYL-2-OXOVALERATE	C6 H10 O3		0.0175	-0.0635	-0.0445	0.0195	-0.0155	-0.2905	0.0525	-0.0225	0.0535	0.0335	0.1785	0.0435
HMDB00695	KETOLEUCINE	C6 H10 O3		0.067	-0.011	0	0.145	0.175	-0.151	0.085	-0.091	0.037	0.036	0.214	0.067
HMDB02894	5-METHYLCYTOSINE	C5 H7 N3 O		0.373	0.029	0.097	-0.086	-0.141	-0.142	0.158	0.109	0.103	-0.119	0.061	0.057
HMDB02250	LAUROYLCARNITINE	C19 H37 N O4		0.132	0.011	-0.019	-0.031	-0.157	-0.186	0.248	0.099	0.089	-0.099	0.166	0.036
HMDB00139	GLYCERATE	C3 H6 O4		0.04	0.068	0.081	-0.132	-0.188	-0.093	0.274	0.225	0.268	-0.07	-0.005	0.043
HMDB01539	N,N-DIMETHYLARGININE	C8 H18 N4 O2		0.0125	-0.0005	0.0145	-0.0285	-0.0045	-0.0895	0.0895	0.1125	0.0615	-0.0515	0.0795	0.0435
HMDB01186	N1-ACETYLSPERMINE	C12 H28 N4 O		0.046	0.011	0.03	-0.104	-0.011	-0.036	0.449	0.277	0.248	-0.212	0.191	0.22
HMDB59655	2-HYDROXYGLUTARIC	C5 H8 O5		0.0955	0.0575	0.0475	0.0035	-0.0315	-0.0795	0.2335	0.1545	0.1465	-0.1845	0.0605	-0.0035
HMDB00132	GUANINE-2	C5 H5 N5 O		0.0785	0.0255	0.0375	-0.0915	-0.0775	-0.1405	0.1245	0.1005	-0.0025	-0.0855	-0.0015	0.0115
HMDB11691	CYTIDINE 2',3'-CYCLIC PHOSPHATE	C9 H12 N3 O7 P		0.0035	-0.0015	-0.0055	-0.0575	0.0075	-0.0745	0.0375	0.0365	0.0385	-0.0085	0.0335	0.0455
HMDB01565	PHOSPHORYLCHOLINE	C5 H14 N O4 P		0.024	0.009	0.004	0.013	0.017	-0.036	0.08	0.059	-0.012	-0.042	-0.018	-0.017
HMDB00215	N-ACETYLGLUCOSAMINE	C8 H15 N O6		-0.023	-0.001	0.012	-0.049	-0.019	0.001	0.076	0.036	0.032	0.078	-0.019	0.051
HMDB00095	CYTIDINE MONOPHOSPHATE	C9 H14 N3 O8 P		-0.001	-0.013	-0.02	-0.032	-0.053	0.01	0.136	0.228	0.014	0.045	0.012	0.047
HMDB00807	3-PHOSPHOGLYCERATE	C3 H7 O7 P		0.0005	-0.0425	-0.0505	-0.2145	-0.2215	-0.1045	0.0605	0.0275	0.1095	0.0445	0.0015	-0.0685
HMDB02183	DOCOSAHEXAENOATE	C22 H32 O2		-0.0985	0.0215	0.0285	-0.4385	-0.1415	-0.1675	0.3655	0.3335	0.5085	-0.0195	-0.0835	0.0935
HMDB00673	LINOLEATE	C18 H32 O2		-0.086	-0.056	0.002	-0.29	-0.157	-0.057	0.132	0.148	0.433	0.147	-0.096	0.138
HMDB03073	GAMMA-LINOLENATE	C18 H30 O2		-0.192	0.018	-0.032	-0.415	-0.018	0.033	-0.053	0.19	0.445	0.161	-0.018	0.113
HMBD01999	EICOSAPENTAENOATE	C20 H30 O2		-0.224	-0.025	0.012	-0.59	-0.228	-0.1	0.017	0.21	0.503	0.197	-0.027	0.157
HMDB11503	LPE(16:0)	C21 H44 N O7 P		-0.126	0.223	0.061	-0.143	-0.263	-0.28	0.035	0.048	0.184	0.176	0.199	-0.029
HMDB11505	LPE(18:1)	C23 H46 N O7 P		-0.0545	0.1195	-0.0515	-0.3215	-0.4315	-0.4415	0.0595	0.0505	0.3265	0.0535	0.1645	0.1485
HMDB10382	LPC(16:0)	C24 H50 N O7 P		-0.0295	0.2485	0.0945	-0.2355	-0.4465	-0.2095	-0.0055	0.0515	0.1875	0.1255	0.2625	0.0535
HMDB10385	LPC(18:1)	C26 H52 N O7 P		-0.053	0.181	0.169	-0.358	-0.456	-0.26	0.088	0.13	0.214	0.097	0.227	0.095
HMDB05066	TETRADECANOYLCARNITINE	C21 H41 N O4		0.0885	0.1915	0.0165	-0.0715	-0.2805	-0.3085	0.1765	0.1425	0.2635	-0.0925	0.1735	-0.0175
HMDB00846	PALMITOYLCARNITINE	C23 H45 N O4		-0.011	0.377	0.226	-0.21	-0.368	-0.396	0.165	0.202	0.357	-0.147	0.231	-0.053
HMDB00848	STEAROYLCARNITINE	C25 H49 N O4		0.04	0.409	0.122	-0.239	-0.278	-0.42	0.229	0.278	0.418	-0.231	0.393	0.015
HMDB00965	HYPOTAURINE	C2 H7 N O2 S		0.0035	-0.0405	-0.0025	-0.0985	-0.2345	-0.1235	0.0195	0.0255	0.0575	0.0655	0.0715	0.0735
HMDB01325	N,N,N-TRIMETHYLLYSINE	C9 H20 N2 O2		-0.003	-0.02	0.003	-0.059	-0.058	-0.087	0.039	0.063	0.15	0.029	0.064	0.055
YMDB00390	3-DEHYDROSHIKIMATE	C7 H8 O5		-0.0385	0.0405	0.0555	-0.0165	-0.2985	-0.1825	0.0765	0.1385	0.2085	0.0165	0.1165	0.0535
HMDB00462	ALLANTOIN	C4 H6 N4 O3		-0.0025	0.0075	0.0025	0.0875	-0.0435	-0.0925	0.0825	0.1045	0.0925	0.0155	0.0445	-0.0385
HMDB00350	3-Hydroxysebacic acid	C10 H18 O5		0.475	0.265	-0.304	0.047	-1.969	-1.807	0.484	0.467	0.32	-0.047	0.219	-1.732
